# Supplementary material
Source: ML conference proceedings conference paper supplement (https://openreview.net/forum?id=GJsuYHhAga)
Supplement: supplementary_material [file attachment]

# MEISSONIC: REVITALIZING MASKED GENERATIVE TRANSFORMERS FOR EFFICIENT HIGH-RESOLUTION TEXT-TO-IMAGE SYNTHESIS

**Anonymous authors**

Paper under double-blind review

## ABSTRACT

We present Meissonic, which elevates non-autoregressive text-to-image Masked Image Modeling (MIM) to a level comparable with state-of-the-art diffusion models like SDXL. By incorporating a comprehensive suite of architectural innovations, advanced positional encoding strategies, and optimized sampling conditions, Meissonic substantially improves MIM’s performance and efficiency. Additionally, we leverage high-quality training data, integrate micro-conditions informed by human preference scores, and employ feature compression layers to further enhance image fidelity and resolution. Our model not only matches but often exceeds the performance of existing methods in generating high-quality, high-resolution images. Extensive experiments validate Meissonic’s capabilities, demonstrating its potential as a new standard in text-to-image synthesis. We release a model checkpoint capable of producing  $1024 \times 1024$  resolution images.

## 1 INTRODUCTION

Diffusion models, such as Stable Diffusion (Rombach et al., 2022a; Podell et al., 2023; per, 2024; Art, 2023), have rapidly advanced to become the dominant paradigm in visual generation by replacing Generative Adversarial Network (GAN). Recent developments like LlamaGen (Sun et al., 2024) have ventured into autoregressive image generation using discrete image tokens derived from VQ-VAE (Yu et al., 2022a). Despite progress, the substantial number of image tokens compared to text tokens makes autoregressive generation inefficient. For example, tokenizing one  $1024 \times 1024$  image using a  $16\times$  downsampled VQVAE yields 4096 tokens, where a sequential generation process is prohibitively slow.

Masked generative transformers, a class of generative models, have achieved significant results in the fields of image generation. Specifically, MaskGIT (Chang et al., 2022) introduced a more efficient, non-autoregressive alternative, where all image tokens are predicted simultaneously in a parallel, iterative refinement process. Then, MUSE (Chang et al., 2023) extended this technique to higher resolutions, achieving  $512 \times 512$  resolution T2I generation. These non-autoregressive methods offer around 99% reduction in decoding steps compared to autoregressive methods. However, despite their efficiency, non-autoregressive transformers remain limited in performance compared to advancing diffusion or autoregressive models, particularly in high-quality, high-resolution text-to-image synthesis.

In this work, we address these challenges and introduce two key innovations to make masked image modeling (MIM) competitive with advanced diffusion models:

**Enhanced Transformer Architecture:** Previous MIM methods (Chang et al., 2023; 2022) predominantly utilized naive transformer architectures, potentially limiting their capabilities. We discovered that a combination of multi-modal and single-modal transformer layers can significantly boost MIM training efficiency and performance. Language and vision representations are inherently different. The multi-modal transformer can effectively capture cross-modal interactions, extracting information from unpooled text representations and effectively bridging the gap between these distinct modalities. This allows the model to harness useful signals from noisy data. Additionally, subsequent single-modal transformer layers refine the visual representation, improving performance and training stability. Empirically, a 1 : 2 ratio between these two types of transformer layers yields optimal performance.

054  
055  
056  
057  
058  
059  
060  
061  
062  
063  
064  
065  
066  
067  
068  
069  
070  
071  
072  
073  
074  
075  
076  
077  
078  
079  
080  
081  
082  
083  
084  
085  
086  
087  
088  
089  
090  
091  
092  
093  
094  
095  
096  
097  
098  
099  
100  
101  
102  
103  
104  
105  
106  
107

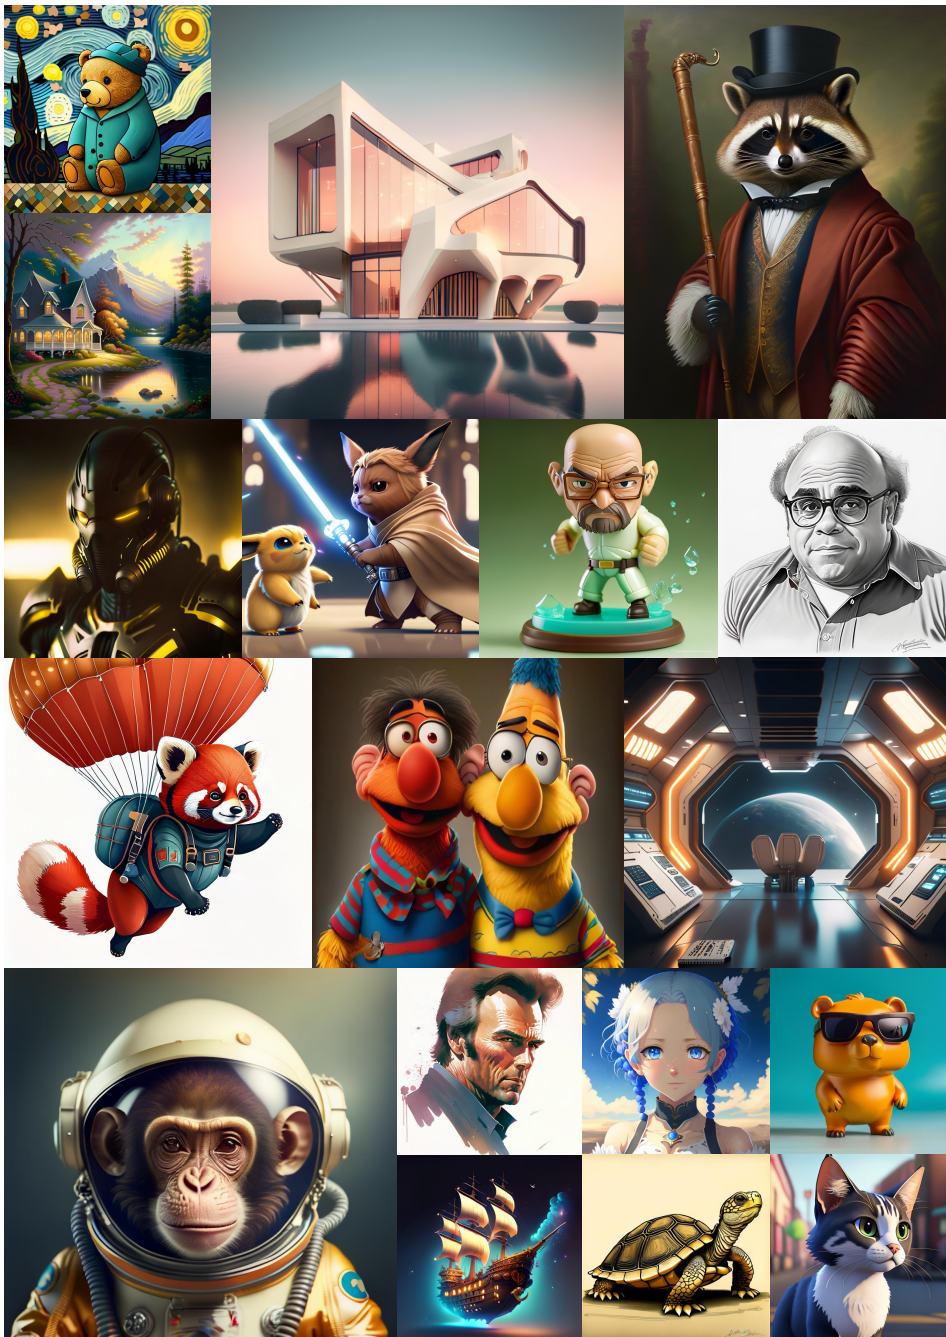

Figure 1: Images produced by Meissonic exhibit exceptional image quality. More samples can be found in Appendix M. Notably, Meissonic can effortlessly produce images with solid-color backgrounds without requiring any additional modifications.

**Advanced Positional Encoding & Masking Rate as Sampling Condition:** We incorporate Rotary Position Embedding (RoPE) (Su et al., 2024) for encoding positional information in queries and keys, which helps maintain detail in high-resolution images. RoPE effectively addresses the issue of context disassociation in transformers as the number of tokens increases. Traditional absolute positional encoding methods lead to distortions and loss of detail at  $512 \times 512$  resolutions, whereas RoPE significantly mitigates these issues. Additionally, we introduce the masking rate as a dynamic sampling condition throughout the generation process. Previous MIM methods Chang et al. (2023; 2022) have overlooked this aspect, resulting in suboptimal image details. This issue arises because the number of tokens predicted by the MIM model changes dramatically throughout the sampling



108 loop. With the masking rate condition, the model can ascertain the current stage of the sampling  
109 period by leveraging conditional information from the masking rate. Note that merely relying on  
110 attention masks is insufficient to bridge this gap. We achieve effective conditional encoding by  
111 discretizing the continuous masking rate into 1000 levels. This approach enables the model to adapt  
112 to different stages of the sampling process, significantly improving image detail and overall quality.

113 Beyond these architectural improvements, to achieve comparable performance with SDXL for high-  
114 resolution generation, we adopt effects in three additional aspects:

115 **High-Quality Training Data:** The quality of training data is crucial. While LAION (Schuhmann  
116 et al., 2022) offers a diverse visual dataset, its captions can be subpar (Chen et al., 2024). We curated  
117 a high-quality internal dataset with accurate captions, which, combined with our training strategy,  
118 significantly improved the generative capabilities of the base model.

119 **Micro-Conditioning:** We identified that incorporating original image resolution, crop coordinates,  
120 and human preference scores (Wu et al., 2023) as micro-conditions greatly enhances model stability  
121 during high-resolution aesthetic training.

122 **Feature Compression Layers:** To efficiently generate high-resolution images, we integrated feature  
123 compression layers, maintaining computational efficiency even at  $1024 \times 1024$  resolution.

124 Our contributions culminate in **Meissonic**, a next-generation T2I model based on masked discrete  
125 image token modeling. Unlike larger diffusion models such as SDXL (Podell et al., 2024) and  
126 DeepFloyd-XL (Liu et al., 2024a), Meissonic, with just 1B parameters, offers comparable or supe-  
127 rior  $1024 \times 1024$  high-resolution, aesthetically pleasing images while being able to run on consumer-  
128 grade GPUs with only 8GB VRAM without the need for any additional model optimizations. More-  
129 over, Meissonic effortlessly generates images with solid-color backgrounds, a feature that usually  
130 demands model fine-tuning or noise offset adjustments in diffusion models.

131 Advancement of Meissonic represents a significant stride towards high-resolution, efficient, and ac-  
132 cessible T2I MIM models. We evaluate Meissonic using various qualitative and quantitative metrics,  
133 including HPS, MPS, GenEval benchmarks, and GPT4o assessments, demonstrating its superior  
134 performance and efficiency.

## 137 2 METHOD

### 139 2.1 MOTIVATION

140 Recent breakthroughs in text-to-image synthesis have been largely propelled by diffusion models,  
141 such as Stable Diffusion XL, which have set *de facto* standards for image quality, detail, and con-  
142 ceptual fidelity.

143 [Another approach, non-autoregressive Masked Image Modeling \(MIM\) techniques, exemplified by](#)  
144 [MaskGIT and MUSE, has shown potential for efficient image generation to replace slow autore-](#)  
145 [gressive techniques like Llamagen.](#) Yet, despite their promise, MIM approaches face two critical  
146 limitations:

147 **(a) Resolution Constraint.** Current MIM methods are limited to generating images at a maximum  
148 resolution of  $512 \times 512$  pixels. This limitation hinders their broader adoption and advancement,  
149 particularly as the text-to-image synthesis community increasingly adopts  $1024 \times 1024$  resolution  
150 as the standard.

151 **(b) Performance Gap.** Existing MIM techniques have not yet achieved the level of performance  
152 exhibited by leading diffusion models like SDXL. They notably underperform in key areas such  
153 as image quality, intricate detailing, and conceptual representation, which are critical for practical  
154 applications.

155 These challenges necessitate the exploration of new approaches. Our objective is to empower MIM  
156 to efficiently generate high-resolution images (e.g.,  $1024 \times 1024$ ), while narrowing the gap with top-  
157 tier diffusion models, and ensuring computational efficiency suitable for consumer-grade hardware.

158 Through our work, Meissonic, we aim to push the boundaries of MIM methods and bring them to  
159 the forefront of text-to-image synthesis.

162  
163  
164  
165  
166  
167  
168  
169  
170  
171  
172  
173  
174  
175  
176  
177  
178  
179  
180  
181  
182  
183  
184  
185  
186  
187  
188  
189  
190  
191  
192  
193  
194  
195  
196  
197  
198  
199  
200  
201  
202  
203  
204  
205  
206  
207  
208  
209  
210  
211  
212  
213  
214  
215

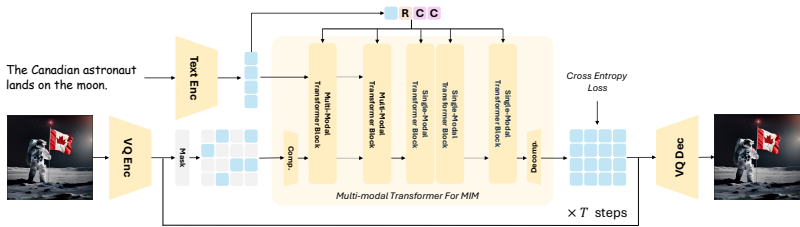

Figure 2: **The architecture of Meissonic.** During the image generation process, discrete tokens are created randomly according to a predefined schedule. Meissonic then applies masking and performs predictions over several steps to reconstruct all tokens and decode the resulting image. In the case of image editing, the original image is converted into discrete tokens, which are masked according to a specified masking strategy. After a series of processing steps, the masked tokens are reconstructed and utilized to decode the target image. Text prompts and other conditions are incorporated to control the synthesis process.  $R$  represents the masking rate condition, and  $C$  indicates the micro conditions. More details about Multi-modal Transformer Block can be found in Appendix I.

## 2.2 MODEL ARCHITECTURE

The Meissonic model is architected to facilitate efficient high-performance text-to-image synthesis through an integrated framework comprising a CLIP text encoder (Radford et al., 2021), a vector-quantized (VQ) image encoder and decoder (Esser et al., 2021a), and a Multi-modal Transformer backbone. Figure 2 illustrates the overall structure of the model.

**Vector-quantized Image Encoder and Decoder.** We employ a VQ-VAE model (Esser et al., 2021a) to convert raw image pixels into discrete semantic tokens. This model comprises an encoder, a decoder, and a quantization layer that maps input images into sequences of discrete tokens using a learned codebook. For an image of size  $H \times W$ , the encoded token size is  $\frac{H}{f} \times \frac{W}{f}$ , where  $f$  represents the downsampling ratio. In our implementation, we utilize a downsampling ratio of  $f = 16$  and a codebook size of 8192, allowing a  $1024 \times 1024$  image to be encoded into a sequence of  $64 \times 64$  discrete tokens.

**Flexible and Efficient Text Encoder.** Instead of using large language model encoders, such as T5-XXL<sup>1</sup> (Raffel et al., 2020) or LLaMa (Touvron et al., 2023), which are prevalent in previous works (Chen et al., 2024; Esser et al., 2024), we utilize a single text encoder from the state-of-the-art CLIP model with a latent dimension of 1024, and fine-tune for optimal T2I performance. While this decision may limit the model’s capacity to fully comprehend lengthy text prompts, our observations indicate that excluding large-scale text encoders like T5 does not diminish visual quality. Moreover, this approach significantly reduces GPU memory requirements and computational cost. Notably, offline extraction of T5 features would entail approximately 11 times more processing time and 6 times more storage than employing the CLIP text encoder, underscoring the efficiency of our design.

**Multi-modal Transformer Backbone for Masked Image Modeling.** Our transformer architecture builds upon the Multi-modal Transformer framework (Sauer et al., 2024), incorporating sampling parameters  $r$  to encode sampling parameters and Rotary Position Embeddings (RoPE) (Su et al., 2024) for spatial information encoding. We introduce feature compression layers to efficiently handle high-resolution generation with numerous discrete tokens. These layers compress embedding features from  $64 \times 64$  to  $32 \times 32$  before processing through the transformer, and followed by feature decompression layers to  $64 \times 64$ , thereby alleviating computational burdens. To enhance training stability and mitigate the *NaN Loss* issue, we follow the training strategy from LLaMa Touvron et al. (2023), implementing gradient clipping and checkpoint reloading during distributed training and integrating QK-Norm layers into the architecture. We elaborate on the designs of our transformer in the subsequent section.

**Diverse Micro Conditions.** To augment generation performance, we incorporate additional conditions such as original image resolution, crop coordinates, aesthetic score, and human preference

<sup>1</sup>Many works indicate that the T5 text encoder is the key factor in obtaining the ability to synthesize words, we still show the ability to synthesize letters in Figure 10. We leave this a future improvement.

score (Wu et al., 2023). These conditions are transformed into sinusoidal embeddings and concatenated as additional channels to the final pooled hidden states of the text encoder.

**Masking Strategy.** Following the approach established in Chang et al. (2023), we employ a variable masking ratio with cosine scheduling. Specifically, we randomly sample a masking ratio  $r \in [0, 1]$  from a truncated *arccos* distribution characterized by the following density function:

$$p(r) = \frac{2}{\pi}(1 - r^2)^{-\frac{1}{2}}$$

In contrast to autoregressive models that learn conditional distributions  $P(x_i | x_{<i})$  for fixed token orders, our approach utilizes random masking with variable ratios to enable the model to learn  $P(x_i | x_\Lambda)$  for arbitrary subsets of tokens  $\Lambda$ . This flexibility is pivotal for our parallel sampling strategy and facilitates various zero-shot image editing capabilities, which will be demonstrated in Section 3.

### 2.3 MULTI-MODAL TRANSFORMER FOR MASKED IMAGE MODELING

Meissonic employs the Multi-modal Transformer as its foundational architecture and innovatively customizes the modules to address the distinctive challenges inherent in high-resolution masked image modeling. We introduce several specialized designs for MIM as follows:

- *Rotary Position Embeddings.* RoPE (Su et al., 2024) has demonstrated exceptional performance within in LLMs (Su et al., 2024; Touvron et al., 2023; Ding et al., 2024; Bai et al., 2023). Some studies (Lu et al., 2024; Lin et al., 2023; Zhuo et al., 2024) have attempted to extend 1D RoPE (Su et al., 2024) to 2D or 3D for image diffusion models. Our findings reveal that, due to the high-quality image tokenizer used for converting images into discrete tokens, the original 1D RoPE yields promising results. This 1D RoPE facilitates a seamless transition from the  $256 \times 256$  stage to the  $512 \times 512$  stage, simultaneously enhancing the generative performance of the model. **The 2D MIM tokens are categorized into two types: image tokens and text tokens. Although image tokens are inherently 2D, they can be reshaped into a 1D sequence, allowing for the concatenation of 1D image tokens and text tokens using 1D RoPE encoding.**
- *Deeper Model with Single-modal Transformer.* Although the Multi-modal Transformer block demonstrated commendable performance, our experiments reveal that reducing the number of multi-modal blocks to a single-modal block configuration offers a more stable and computationally efficient approach for training T2I models. Therefore, we opt to employ Multi-modal Transformer blocks in the initial stages of the network, transitioning to exclusively Single-modal Transformer blocks in the latter half. Our findings suggest an optimal block ratio of about 1:2.
- *Micro Conditions with Human Preference Score.* Our experiments reveal that incorporating three micro-conditions is pivotal for achieving a stable and reliable High-resolution MIM Model: original image resolution, crop coordinates, and human preference score. The original image resolution effectively aids the model in implicitly filtering out low-quality data and learning the properties of high-quality, high-resolution data, while crop coordinates enhance training stability, likely due to improved consistency between image conditions and semantic conditions during cropped patch coordination. In the final stage, we leverage the Human Preference Score (Wu et al., 2023) to effectively enhance image quality, using signals provided by the Human Preference Model to guide the model’s outputs in mimicking and approximating human preferences.
- *Feature Compression Layers.* Existing multi-stage approaches, such as MUSE Chang et al. (2023) and DeepFloyd-XL DeepFloyd (2023), employ cascading multiple subnetworks to achieve higher-resolution image generation. We argue that such multi-stage training introduces unnecessary complexity and hampers the generation of high-fidelity, high-resolution images. Instead, we advocate integrating streamlined feature compression layers during the fine-tuning stage to facilitate efficient high-resolution generation process learning. This approach functions akin to a lightweight high-resolution adapter Guo et al. (2024), a module extensively explored and integrated within Stable Diffusion. By incorporating 2D convolution-based feature compression layers into the transformer backbone, we compress



Table 2: HPS v2.0 benchmark. Scores are collected from <https://github.com/tgxs002/HPSv2>. We highlight the best.

| Model                                         | HPS v2.0     |              |              |              |              |
|-----------------------------------------------|--------------|--------------|--------------|--------------|--------------|
|                                               | Animation    | Concept-art  | Painting     | Photo        | Averaged     |
| DALL-E 2 (Ramesh et al., 2022)                | 27.34        | 26.54        | 26.68        | 27.24        | 26.95        |
| Stable Diffusion v1.4 (Rombach et al., 2022a) | 27.26        | 26.61        | 26.66        | 27.27        | 26.95        |
| Stable Diffusion v2.0 (Rombach et al., 2022a) | 27.48        | 26.89        | 26.86        | 27.46        | 27.17        |
| SDXL Base 0.9 (Podell et al., 2024)           | 28.42        | 27.63        | 27.60        | 27.29        | 27.73        |
| Realistic Vision (rea, 2024)                  | 28.22        | 27.53        | 27.56        | 27.75        | 27.77        |
| SDXL Refiner 0.9 (Podell et al., 2024)        | 28.45        | 27.66        | 27.67        | 27.46        | 27.80        |
| SDXL Base 1.0 (Podell et al., 2024)           | 28.88        | 27.88        | 27.92        | 28.31        | 28.25        |
| SDXL Refiner 1.0 (Podell et al., 2024)        | 28.93        | 27.89        | 27.90        | 28.38        | 28.27        |
| Meissonic-512                                 | 28.90        | 28.15        | 28.22        | 28.04        | 28.33        |
| Meissonic                                     | <b>29.57</b> | <b>28.58</b> | <b>28.72</b> | <b>28.45</b> | <b>28.83</b> |

the feature maps prior to the transformer layers and subsequently decompress them after the transformer layers, effectively addressing the challenges of efficiency and resolution transition. Specifically, the compression layer before the transformer employs 2D convolution with a kernel size of  $2 \times 2$  and stride of 2, while the decompression layer after the transformer utilizes 2D transposed convolution with the same kernel size of  $2 \times 2$  and stride of 2.

## 2.4 TRAINING DETAILS

Meissonic is constructed using a CLIP-ViT-H-14<sup>2</sup> text encoder (Ilharco et al., 2021), a pre-trained VQ image encoder and decoder (Patil et al., 2024), and a customized Transformer-based (Esser et al., 2024) backbone. We employ classifier-free guidance (CFG) (Ho & Salimans, 2022) and cross-entropy loss to train Meissonic. Training occurs across three resolution stages,

leveraging both public datasets and our curated data. First, we train Meissonic-256 with a batch size of 2,048 for 100,000 steps. Second, we continue training Meissonic-512 with a batch size of 512 for an additional 100,000 steps. Third, we continue training Meissonic with a batch size of 256 for 42,000 steps with a resolution of  $1024 \times 1024$ . The performance results of Meissonic-512 and Meissonic are reported in Table 2. All experiments are carried out with a fixed learning rate of  $1 \times 10^{-4}$ . Further details are elaborated in Sec. 2.5. All inferences in this paper are performed with CFG = 9 and 48 steps.

It’s crucial to highlight the resource efficiency of our training process. Our training is considerably more resource-efficient compared to Stable Diffusion (Podell et al., 2023). Meissonic is trained in approximately 100 H100 GPU days, demonstrating that a production-ready image synthesis foundation model can be developed with considerably reduced computational costs. Additional details on this comparison can be found in Table 1.

## 2.5 PROGRESSIVE AND EFFICIENT TRAINING STAGE DECOMPOSITION

Our approach systematically decomposes the training process into four carefully designed stages, allowing us to progressively build and refine the model’s generative capabilities. These stages, combined with precise enhancements to specific components, contribute to continual improvements in synthesis quality. Given that SDXL has not disclosed details regarding its training data, our experience is particularly valuable for guiding the community in constructing SDXL-level text-to-image models. We present images generated by Meissonic at each of the four training stages in Figure 3 to support our claims. More examples can be found in Appendix K.

<sup>2</sup>We utilize “laion/CLIP-ViT-H-14-laion2B-s32B-b79K” from OpenCLIP as our initial weights.

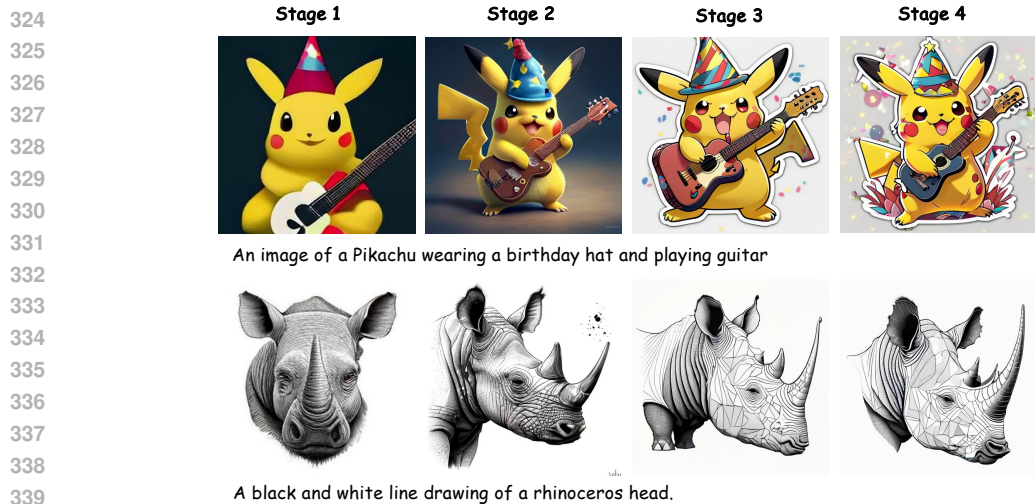

340 Figure 3: Images generated using the same prompt across Meissonic’s four training stages. The  
 341 resolutions for stages 1 and 2 are  $256^2$  and  $512^2$ , respectively, while stages 3 and 4 are  $1024^2$ . For  
 342 clarity and comparison, all images are displayed in a consistent layout.  
 343

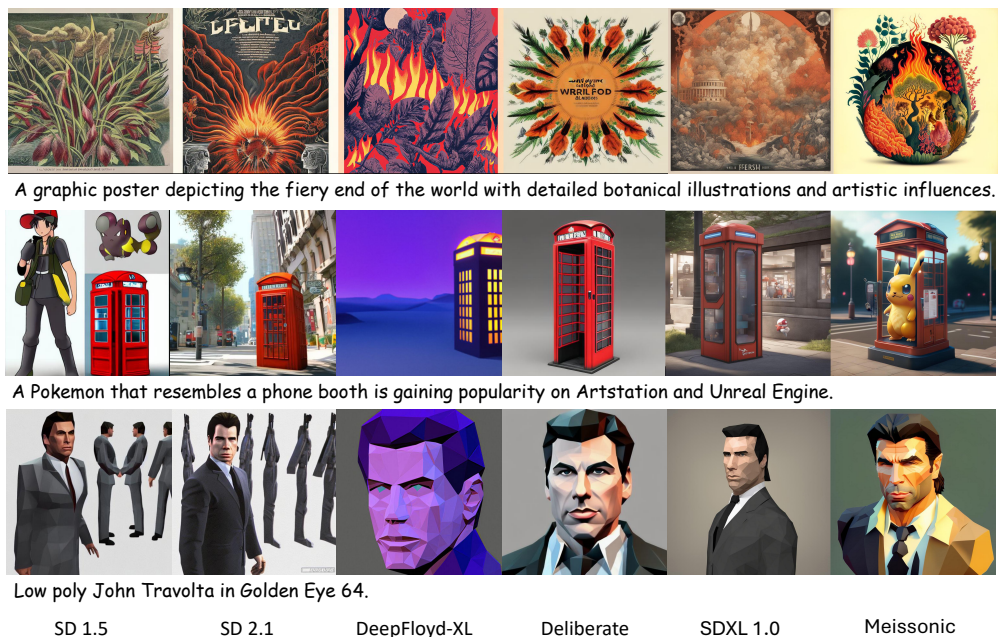

366 Figure 4: Qualitative Comparisons with SD 1.5, SD 2.1, DeepFloyd-XL, Deliberate, and SDXL.  
 367

368  
369 **Stage 1: Understanding Fundamental Concepts from Extensive Data.** Previous studies (Chen  
 370 et al., 2024; Yu et al., 2024) indicate that raw captions from LAION are insufficient for training text-  
 371 to-image models, often requiring the caption refinement provided by MLLMs such as LLaVA (Liu  
 372 et al., 2024b). However, this solution is computationally demanding and time-intensive. While some  
 373 studies (Chen et al., 2024; Schwag et al., 2024) utilize the extensively annotated SA-10M (Kirillov  
 374 et al., 2023) dataset, our findings reveal that SA-10M does not comprehensively cover fundamental  
 375 concepts, particularly regarding human faces. Thus, we carefully curated the deduplicated LAION-  
 376 2B dataset by filtering out images with aesthetic scores below 4.5, watermark probabilities exceeding  
 377 50%, and other criteria outlined in Kolors (2024). This meticulous selection resulted in approxi-  
 mately 200 million images, which were employed for training at a resolution of  $256 \times 256$  in this  
 initial stage.

Table 3: GenEval benchmark. We highlight the **best** result.

| Model       | Overall     | Objects     |             | Counting    | Colors      | Position    | Attribution |
|-------------|-------------|-------------|-------------|-------------|-------------|-------------|-------------|
|             |             | Single      | Two         |             |             |             |             |
| DALL-E mini | 0.23        | 0.73        | 0.11        | 0.12        | 0.37        | 0.02        | 0.01        |
| SD v1.5     | 0.43        | 0.97        | 0.38        | 0.35        | 0.76        | 0.04        | 0.06        |
| SD v2.1     | 0.50        | 0.98        | 0.51        | 0.44        | 0.85        | 0.07        | 0.17        |
| DALL-E 2    | 0.52        | 0.94        | 0.66        | <b>0.49</b> | 0.77        | 0.10        | 0.19        |
| SD XL       | <b>0.55</b> | 0.98        | <b>0.74</b> | 0.39        | 0.85        | <b>0.15</b> | <b>0.23</b> |
| Meissonic   | 0.54        | <b>0.99</b> | 0.66        | 0.42        | <b>0.86</b> | 0.10        | 0.22        |

Table 4: MPS scores on RealUser-800 Prompts. We highlight the **best** result.

| Model                                          | MPS          |
|------------------------------------------------|--------------|
| Latent Diffusion [Rombach et al. (2022b)]      | 10.56        |
| Stable Diffusion v1.4 [Rombach et al. (2022a)] | 13.89        |
| Stable Diffusion v2.0 [Rombach et al. (2022a)] | 14.39        |
| DeepFloyd-XL [DeepFloyd (2023)]                | 15.22        |
| SDXL Base 0.9 [Podell et al. (2024)]           | 16.37        |
| SDXL Refiner 0.9 [Podell et al. (2024)]        | 16.64        |
| SDXL Base 1.0 [Podell et al. (2024)]           | 16.46        |
| SDXL Refiner 1.0 [Podell et al. (2024)]        | 16.56        |
| Meissonic                                      | <b>17.34</b> |

**Stage 2: Aligning Text and Images with Long Prompts.** In the second stage, we focus on improving the model’s capability to interpret long, descriptive prompts. We filtered the initial LAION set more rigorously, retaining only images with aesthetic scores above 8, and other criteria outlined in [Kolors \(2024\)](#). Additionally, we incorporate 1.2 million synthetic image-text pairs with refined captions exceeding 50 words, primarily derived from publicly available high-quality synthetic datasets, complemented by additional high-quality images from our internal 6 million dataset. This aggregation results in around 10 million image-text pairs. Notably, we maintain the model architecture while increasing the training resolution to  $512 \times 512$ , enabling the model to capture more intricate image details. We observed a significant boost in the model’s ability to capture abstract concepts and respond accurately to complex prompts, including diverse styles and fantasy characters.

**Stage 3: Mastering Feature Compression for Higher-resolution Generation.** High-resolution generation remains an unexplored area within MIM ([Chang et al., 2023; 2022; Patil et al., 2024](#)). Unlike methods such as MUSE([Chang et al., 2023](#)) or DeepFloyd-XL ([DeepFloyd, 2023](#)), which rely on external super-resolution (SR) modules, we demonstrate that efficient  $1024 \times 1024$  generation is feasible through feature compression for MIM. By introducing feature compression layers, we achieve a seamless transition from  $512 \times 512$  to  $1024 \times 1024$  generation with minimal computational cost. In this stage, we further refine the dataset by filtering based on resolution and aesthetic score, selecting approximately 100K high-quality, high-resolution image-text pairs from the LAION subset utilized in Stage 2. This, combined with the remaining high-quality data, results in approximately 6 million samples for training at 1024 resolution.

**Stage 4: Refining High-Resolution Aesthetic Image Generation.** In the final stage, we fine-tune the model using a small learning rate, without freezing the text encoder, and incorporate aesthetic score as a micro condition. This can significantly enhance the model’s performance in high-resolution image generation. This targeted adjustment significantly enhances the model’s performance in generating high-resolution images, while also improving diversity. The training data remains the same as in Stage 3.

## 3 RESULTS

### 3.1 QUANTATIVE COMPARISON

Classic evaluation metrics for image generation models, such as FID and CLIP Score, have limited relevance to visual aesthetics, as highlighted by [Podell et al. \(2024\)](#); [Chen et al. \(2024\)](#); [Kolors \(2024\)](#); [Schwag et al. \(2024\)](#). Therefore, we report our model’s performances using Human Preference Score v2 (HPSv2) ([Wu et al., 2023](#)), GenEval ([Ghosh et al., 2024](#)), and Multi-Dimensional Human Preference Score (MPS)<sup>3</sup> ([Zhang et al., 2024b](#)), as illustrated in Table 2,3,4.

In our pursuit of making Meissonic accessible to the broader community, we optimized our model to 1 billion parameters, ensuring that it runs efficiently on 8GB VRAM, making inference and fine-tuning both convenient. Figure 5 provides a comparative analysis of GPU memory con-

Table 5: Comparison of 1 step (50 steps) inference time (s) for Different Models and Batch Sizes.

| Model          | Batch Size  |              |              |              |
|----------------|-------------|--------------|--------------|--------------|
|                | 1           | 2            | 4            | 8            |
| SDXL Base 1.0  | 0.36 (5.38) | 0.75 (10.06) | 1.41 (19.69) | 2.79 (38.58) |
| Meissonic-256  | 0.09 (3.11) | 0.10 (3.14)  | 0.11 (3.22)  | 0.16 (4.70)  |
| Meissonic-512  | 0.13 (3.24) | 0.17 (4.24)  | 0.28 (7.74)  | 0.51 (14.51) |
| Meissonic-1024 | 0.24 (3.48) | 0.35 (4.62)  | 0.62 (8.52)  | 1.17 (16.46) |

<sup>3</sup>Given that the KolorsPrompts benchmark was unavailable, we curated a diverse prompt dataset consisting of 800 real user-generated prompts spanning various concepts and themes for the MPS evaluation.



432  
433  
434  
435  
436  
437  
438  
439  
440  
441  
442  
443  
444  
445  
446  
447  
448  
449  
450  
451  
452  
453  
454  
455  
456  
457  
458  
459  
460  
461  
462  
463  
464  
465  
466  
467  
468  
469  
470  
471  
472  
473  
474  
475  
476  
477  
478  
479  
480  
481  
482  
483  
484  
485

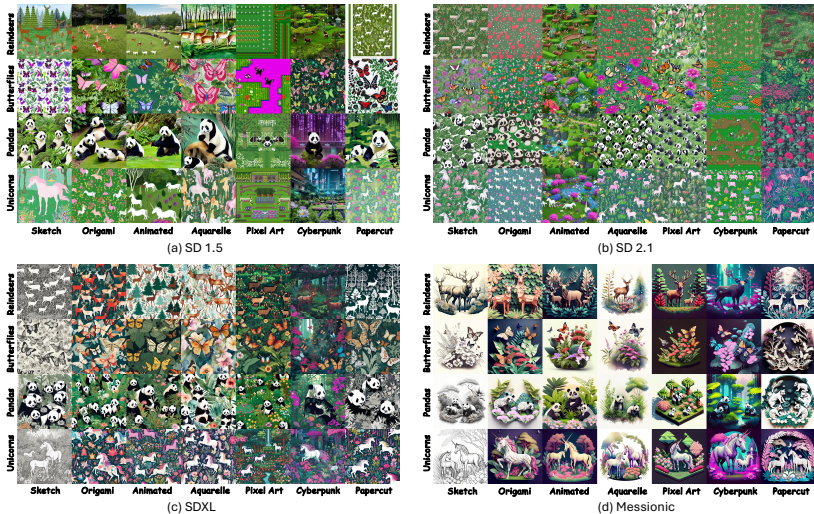

Figure 6: Evaluating the ability to generate diverse styles. *Prompt*: A garden full of [Y] illustrated in [X] style.

sumption<sup>4</sup> across different inference batch sizes against SDXL. Additionally, Table 5 details the inference time per step<sup>5</sup>.

### 3.2 QUALITATIVE COMPARISON

We also present qualitative comparisons of image quality and text-image alignment in Figure 4, with additional comparisons provided in the Appendix. Furthermore, Figure 6 illustrates Meissonic’s proficiency in generating text-driven style art image.

To complement these analyses, we conduct GPT-4o to evaluate the performance between Meissonic and other models in Figure 9.

All Figures and Tables demonstrate that Meissonic achieves competitive performance in human performance and text alignment compared to DALL-E 2 and SDXL, as well as showcasing its efficiency.

### 3.3 ZERO-SHOT IMAGE-TO-IMAGE EDITING

For image editing tasks, we benchmarked Meissonic against state-of-the-art models using the EMU-Edit dataset (Sheynin et al., 2024), with results presented in Table 6. Additionally, examples from our internal image editing dataset<sup>6</sup>, including mask-guided editing in Figure 7 and mask-free editing in Figure 8, further showcase Meissonic’s versatility. Remarkably, Meissonic achieved this performance without any training or fine-tuning on image editing-specific data or instruction dataset. More comparisons for zero-shot image editing ability can be found in Appendix F.

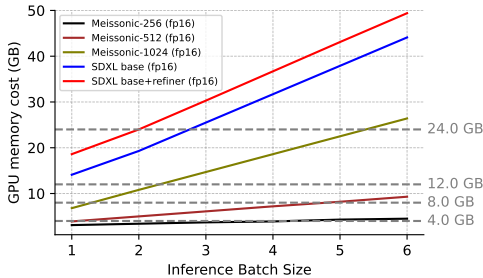

Figure 5: GPU Memory Cost vs Inference Batch Size for Different Models.

| Model                                 | CLIP-I $\uparrow$ | CLIP-T $\uparrow$ | DINO $\uparrow$ |
|---------------------------------------|-------------------|-------------------|-----------------|
| InstructPix2Pix (Brooks et al., 2023) | 0.834             | 0.219             | 0.762           |
| MagicBrush (Zhang et al., 2024a)      | 0.838             | 0.222             | 0.776           |
| PnP (Tumanyan et al., 2023)           | 0.521             | 0.089             | 0.153           |
| Null-Text Inv. (Mokady et al., 2023)  | 0.761             | 0.236             | 0.678           |
| EMU-Edit (Sheynin et al., 2024)       | 0.859             | 0.231             | 0.819           |
| Meissonic                             | 0.871             | 0.266             | 0.760           |

Table 6: Results on the EMU-Edit Sheynin et al. (2024) test set. As a foundational text-to-image generation framework, Meissonic demonstrates image editing capabilities comparable to leading proprietary systems.

<sup>4</sup>GPU memory usage was gauged using `torch.cuda.memory_reserved()`. While this method might yield higher values, all models are measured under identical settings to maintain fairness.

<sup>5</sup>Inference time is assessed using an A100 GPU with fp16 models. Notably, the reported times contributions from the VAE and text encoder, meaning that multi-step inferences do not scale linearly.

<sup>6</sup>This dataset will be released in a separate work.

486  
487  
488  
489  
490  
491  
492  
493  
494  
495  
496  
497  
498  
499  
500  
501  
502

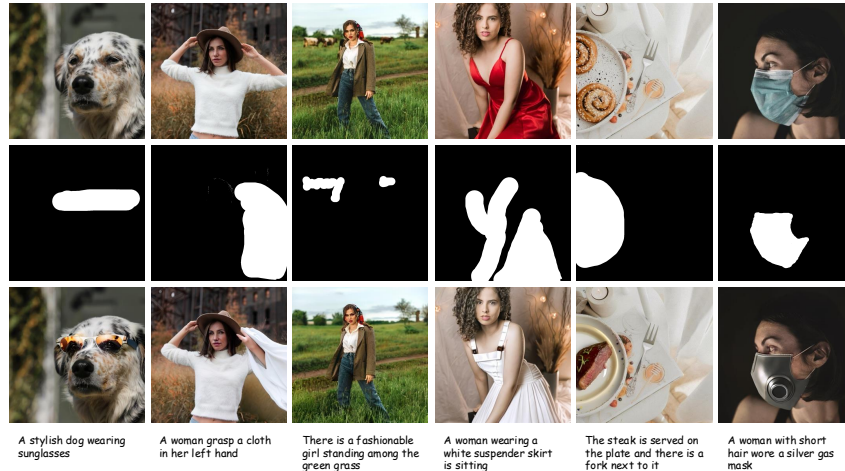

Figure 7: Examples of image editing with mask on internal Image Editing Dataset

503  
504  
505  
506  
507  
508  
509  
510  
511  
512  
513  
514  
515  
516

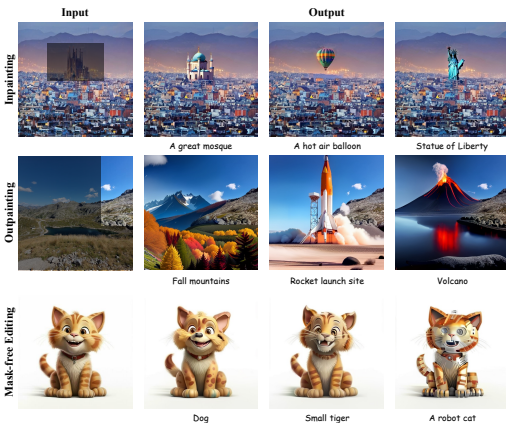

Figure 8: Examples of image inpainting, outpainting, and mask-free image editing on our internal Image Editing Dataset

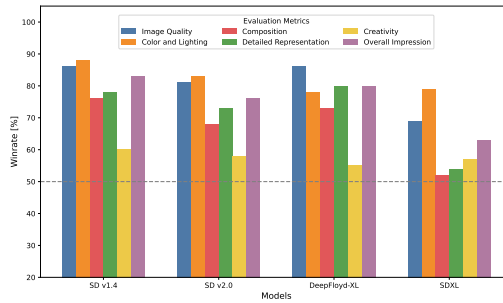

Figure 9: GPT4o Preference Evaluation of Meissonic against current open Text-to-image Models.

## 4 CONCLUSION AND IMPACT

522  
523  
524  
525  
526  
527  
528  
529  
530  
531  
532  
533  
534  
535  
536  
537  
538  
539

In this work, we have significantly advanced masked image modeling (MIM) for text-to-image (T2I) synthesis by introducing several key innovations: a transformer architecture blends multi-modal and single-modal layers, advanced positional encoding strategies, and an adaptive masking rate as the sampling condition. These innovations, coupled with high-quality curated training data, progressive and efficient training stage decomposition, micro-conditions, and feature compression layers, have culminated in Meissonic, a 1B parameter model that outperforms larger diffusion models in high-resolution, aesthetically pleasing image generation while remaining accessible on consumer-grade GPUs. Our evaluations demonstrate Meissonic’s superior performance and efficiency, marking a significant step towards accessible and efficient high-resolution non-autoregressive T2I MIM models.

**Broader Impact.** Recently, offline text-to-image applications on mobile devices have emerged, such as Pixel Studio from Google Pixel 9 and Image Playground from Apple iPhone. These innovations reflect a growing trend toward enhancing user experience and privacy. As a pioneering resource-efficient foundation model, Meissonic represents a significant advancement in this field, delivering state-of-the-art image synthesis capabilities with a strong emphasis on user privacy and offline functionality. This development not only empowers users with creative tools but also ensures the security of sensitive data, marking a notable leap forward in mobile imaging technology. We will continue developing Meissonic II.

540 **Ethics Statement.** This research does not raise any ethical concerns, as it exclusively utilizes publicly  
541 available datasets and does not involve subjective human evaluations. All work presented in  
542 this paper strictly adheres to the ethical guidelines outlined in the ICLR Code of Ethics.

543 **Reproducibility Statement.** We have followed standard baseline settings as employed by com-  
544 parable evaluation benchmarks. Comprehensive implementation details of our methodology are  
545 provided in Section 2.4 and 2.5. To promote transparency and facilitate reproducibility, we are  
546 committed to releasing both the checkpoint and the inference code under an open-access license,  
547 accompanied by thorough documentation and step-by-step instructions. These materials will en-  
548 able the accurate replication of the primary experimental results reported in this work. Additionally,  
549 our research strictly complies with the reproducibility guidelines established by the ICLR Repro-  
550 ducibility Requirements, ensuring that all aspects of the study are reproducible and verifiable by the  
551 community.

## 552 REFERENCES

- 553 Perfect deliberate. <https://civitai.com/models/24350/perfectdeliberate>,  
554 2024.
- 555 Realvisxl v5.0. <https://civitai.com/models/139562/realvisxl-v50>, 2024.
- 556 Dreamlike Art. Dreamlike photoreal 2.0. [https://huggingface.co/dreamlike-art/  
557 dreamlike-photoreal-2.0](https://huggingface.co/dreamlike-art/dreamlike-photoreal-2.0), 2023.
- 558 Jinze Bai, Shuai Bai, Yunfei Chu, Zeyu Cui, Kai Dang, Xiaodong Deng, Yang Fan, Wenbin Ge,  
559 Yu Han, Fei Huang, et al. Qwen technical report. *arXiv preprint arXiv:2309.16609*, 2023.
- 560 Fan Bao, Shen Nie, Kaiwen Xue, Yue Cao, Chongxuan Li, Hang Su, and Jun Zhu. All are worth  
561 words: A vit backbone for diffusion models. In *Proceedings of the IEEE/CVF conference on  
562 computer vision and pattern recognition*, pp. 22669–22679, 2023.
- 563 Tim Brooks, Aleksander Holynski, and Alexei A Efros. Instructpix2pix: Learning to follow image  
564 editing instructions. In *Proceedings of the IEEE/CVF Conference on Computer Vision and Pattern  
565 Recognition*, pp. 18392–18402, 2023.
- 566 Huiwen Chang, Han Zhang, Lu Jiang, Ce Liu, and William T Freeman. Maskgit: Masked generative  
567 image transformer. In *Proceedings of the IEEE/CVF Conference on Computer Vision and Pattern  
568 Recognition (CVPR)*, pp. 11315–11325, 2022.
- 569 Huiwen Chang, Han Zhang, Jarred Barber, AJ Maschinot, Jose Lezama, Lu Jiang, Ming-Hsuan  
570 Yang, Kevin Murphy, William T Freeman, Michael Rubinstein, et al. Muse: Text-to-image gen-  
571 eration via masked generative transformers. *arXiv preprint arXiv:2301.00704*, 2023.
- 572 Junsong Chen, Jincheng YU, Chongjian GE, Lewei Yao, Enze Xie, Zhongdao Wang, James Kwok,  
573 Ping Luo, Huchuan Lu, and Zhenguo Li. Pixart- $\alpha$ : Fast training of diffusion transformer  
574 for photorealistic text-to-image synthesis. In *The Twelfth International Conference on Learning  
575 Representations (ICLR)*, 2024.
- 576 Xi Chen, Nikhil Mishra, Mostafa Rohaninejad, and Pieter Abbeel. Pixelsnail: An improved au-  
577 toregressive generative model. In *International conference on machine learning (ICML)*, pp.  
578 864–872. PMLR, 2018.
- 579 IF DeepFloyd. Deepfloyd if, 2023. URL [https://huggingface. co/DeepFloyd](https://huggingface.co/DeepFloyd), 2023.
- 580 Yiran Ding, Li Lyna Zhang, Chengruidong Zhang, Yuanyuan Xu, Ning Shang, Jiahang Xu, Fan  
581 Yang, and Mao Yang. Longrope: Extending llm context window beyond 2 million tokens. *arXiv  
582 preprint arXiv:2402.13753*, 2024.
- 583 Patrick Esser, Robin Rombach, and Bjorn Ommer. Taming transformers for high-resolution image  
584 synthesis. In *Proceedings of the IEEE/CVF Conference on Computer Vision and Pattern Recog-  
585 nition (CVPR)*, pp. 12873–12883, 2021a.



- 594 Patrick Esser, Robin Rombach, and Bjorn Ommer. Taming transformers for high-resolution image  
595 synthesis. In *Proceedings of the IEEE/CVF conference on computer vision and pattern recogni-  
596 tion (CVPR)*, pp. 12873–12883, 2021b.
- 597
- 598 Patrick Esser, Sumith Kulal, Andreas Blattmann, Rahim Entezari, Jonas Müller, Harry Saini, Yam  
599 Levi, Dominik Lorenz, Axel Sauer, Frederic Boesel, et al. Scaling rectified flow transformers for  
600 high-resolution image synthesis. In *Forty-first International Conference on Machine Learning*,  
601 2024.
- 602 Dhruva Ghosh, Hannaneh Hajishirzi, and Ludwig Schmidt. Geneval: An object-focused frame-  
603 work for evaluating text-to-image alignment. *Advances in Neural Information Processing Systems  
604 (NeurIPS)*, 36, 2024.
- 605
- 606 Lanqing Guo, Yingqing He, Haoxin Chen, Menghan Xia, Xiaodong Cun, Yufei Wang, Siyu Huang,  
607 Yong Zhang, Xintao Wang, Qifeng Chen, et al. Make a cheap scaling: A self-cascade diffusion  
608 model for higher-resolution adaptation. *arXiv preprint arXiv:2402.10491*, 2024.
- 609 Jonathan Ho and Tim Salimans. Classifier-free diffusion guidance. *arXiv preprint  
610 arXiv:2207.12598*, 2022.
- 611
- 612 Gabriel Ilharco, Mitchell Wortsman, Ross Wightman, Cade Gordon, Nicholas Carlini, Rohan Taori,  
613 Achal Dave, Vaishaal Shankar, Hongseok Namkoong, John Miller, Hannaneh Hajishirzi, Ali  
614 Farhadi, and Ludwig Schmidt. Openclip, July 2021.
- 615 Minguk Kang, Jun-Yan Zhu, Richard Zhang, Jaesik Park, Eli Shechtman, Sylvain Paris, and Taesung  
616 Park. Scaling up gans for text-to-image synthesis. In *Proceedings of the IEEE/CVF Conference  
617 on Computer Vision and Pattern Recognition (CVPR)*, pp. 10124–10134, 2023.
- 618
- 619 Alexander Kirillov, Eric Mintun, Nikhila Ravi, Hanzi Mao, Chloe Rolland, Laura Gustafson, Tete  
620 Xiao, Spencer Whitehead, Alexander C Berg, Wan-Yen Lo, et al. Segment anything. In *Proceed-  
621 ings of the IEEE/CVF International Conference on Computer Vision*, pp. 4015–4026, 2023.
- 622 Kolors. Kolors: Effective training of diffusion model for photorealistic text-to-image synthesis.  
623 *arXiv preprint*, 2024.
- 624
- 625 Doyup Lee, Chiheon Kim, Saehoon Kim, Minsu Cho, and Wook-Shin Han. Autoregressive image  
626 generation using residual quantization. In *Proceedings of the IEEE/CVF Conference on Computer  
627 Vision and Pattern Recognition (CVPR)*, pp. 11523–11532, 2022.
- 628
- 629 Xiuyu Li, Yijiang Liu, Long Lian, Huanrui Yang, Zhen Dong, Daniel Kang, Shanghang Zhang,  
630 and Kurt Keutzer. Q-diffusion: Quantizing diffusion models. In *Proceedings of the IEEE/CVF  
631 International Conference on Computer Vision (ICCV)*, pp. 17535–17545, 2023.
- 632 Ji Lin, Hongxu Yin, Wei Ping, Yao Lu, Pavlo Molchanov, Andrew Tao, Huizi Mao, Jan Kautz,  
633 Mohammad Shoeybi, and Song Han. Vila: On pre-training for visual language models, 2023.
- 634
- 635 Bingchen Liu, Ehsan Akhgari, Alexander Visheratin, Aleks Kamko, Linmiao Xu, Shivam Shrirao,  
636 Joao Souza, Suhail Doshi, and Daiqing Li. Playground v3: Improving text-to-image alignment  
637 with deep-fusion large language models. *arXiv preprint arXiv:2409.10695*, 2024a.
- 638 Haotian Liu, Chunyuan Li, Qingyang Wu, and Yong Jae Lee. Visual instruction tuning. *Advances  
639 in neural information processing systems*, 36, 2024b.
- 640
- 641 Zeyu Lu, Zidong Wang, Di Huang, Chengyue Wu, Xihui Liu, Wanli Ouyang, and Lei Bai. Fit:  
642 Flexible vision transformer for diffusion model. *arXiv preprint arXiv:2402.12376*, 2024.
- 643
- 644 Simian Luo, Yiqin Tan, Longbo Huang, Jian Li, and Hang Zhao. Latent consistency models: Synthe-  
645 sizing high-resolution images with few-step inference. *arXiv preprint arXiv:2310.04378*, 2023.
- 646
- 647 Ron Mokady, Amir Hertz, Kfir Aberman, Yael Pritch, and Daniel Cohen-Or. Null-text inversion for  
editing real images using guided diffusion models. In *Proceedings of the IEEE/CVF Conference  
on Computer Vision and Pattern Recognition*, pp. 6038–6047, 2023.

- 648 Kaihang Pan, Siliang Tang, Juncheng Li, Zhaoyu Fan, Wei Chow, Shuicheng Yan, Tat-Seng Chua,  
649 Yueting Zhuang, and Hanwang Zhang. Auto-encoding morph-tokens for multimodal llm. *arXiv*  
650 *preprint arXiv:2405.01926*, 2024.
- 651 Suraj Patil, William Berman, Robin Rombach, and Patrick von Platen. amused: An open muse  
652 reproduction, 2024.
- 654 William Peebles and Saining Xie. Scalable diffusion models with transformers. In *Proceedings of*  
655 *the IEEE/CVF International Conference on Computer Vision*, pp. 4195–4205, 2023.
- 656 Pablo Pernias, Dominic Rampas, Mats Leon Richter, Christopher Pal, and Marc Aubreville.  
657 Würstchen: An efficient architecture for large-scale text-to-image diffusion models. In *The*  
658 *Twelfth International Conference on Learning Representations (ICLR)*, 2024.
- 660 Dustin Podell, Zion English, Kyle Lacey, Andreas Blattmann, Tim Dockhorn, Jonas Müller, Joe  
661 Penna, and Robin Rombach. Sdxl: Improving latent diffusion models for high-resolution image  
662 synthesis. *arXiv preprint arXiv:2307.01952*, 2023.
- 663 Dustin Podell, Zion English, Kyle Lacey, Andreas Blattmann, Tim Dockhorn, Jonas Müller, Joe  
664 Penna, and Robin Rombach. SDXL: Improving latent diffusion models for high-resolution image  
665 synthesis. In *The Twelfth International Conference on Learning Representations (ICLR)*, 2024.
- 666 Alec Radford, Jong Wook Kim, Chris Hallacy, Aditya Ramesh, Gabriel Goh, Sandhini Agarwal,  
667 Girish Sastry, Amanda Askell, Pamela Mishkin, Jack Clark, et al. Learning transferable visual  
668 models from natural language supervision. In *International conference on machine learning*, pp.  
669 8748–8763. PMLR, 2021.
- 671 Colin Raffel, Noam Shazeer, Adam Roberts, Katherine Lee, Sharan Narang, Michael Matena, Yanqi  
672 Zhou, Wei Li, and Peter J Liu. Exploring the limits of transfer learning with a unified text-to-text  
673 transformer. *Journal of machine learning research*, 21(140):1–67, 2020.
- 674 Aditya Ramesh, Prafulla Dhariwal, Alex Nichol, Casey Chu, and Mark Chen. Hierarchical text-  
675 conditional image generation with clip latents. *arXiv preprint arXiv:2204.06125*, 2022.
- 676 Robin Rombach, Andreas Blattmann, Dominik Lorenz, Patrick Esser, and Björn Ommer. High-  
677 resolution image synthesis with latent diffusion models. In *Proceedings of the IEEE/CVF Con-*  
678 *ference on Computer Vision and Pattern Recognition (CVPR)*, pp. 10684–10695, June 2022a.
- 680 Robin Rombach, Andreas Blattmann, Dominik Lorenz, Patrick Esser, and Björn Ommer. High-  
681 resolution image synthesis with latent diffusion models. In *Proceedings of the IEEE/CVF confer-*  
682 *ence on computer vision and pattern recognition (CVPR)*, pp. 10684–10695, 2022b.
- 683 Chitwan Saharia, William Chan, Saurabh Saxena, Lala Li, Jay Whang, Emily L Denton, Kamyar  
684 Ghasemipour, Raphael Gontijo Lopes, Burcu Karagol Ayan, Tim Salimans, et al. Photorealistic  
685 text-to-image diffusion models with deep language understanding. *Advances in neural informa-*  
686 *tion processing systems (NeurIPS)*, 35:36479–36494, 2022.
- 687 Axel Sauer, Dominik Lorenz, Andreas Blattmann, and Robin Rombach. Adversarial diffusion dis-  
688 tillation. *arXiv preprint arXiv:2311.17042*, 2023.
- 690 Axel Sauer, Frederic Boesel, Tim Dockhorn, Andreas Blattmann, Patrick Esser, and Robin Rom-  
691 bach. Fast high-resolution image synthesis with latent adversarial diffusion distillation. *arXiv*  
692 *preprint arXiv:2403.12015*, 2024.
- 693 Christoph Schuhmann, Romain Beaumont, Richard Vencu, Cade W Gordon, Ross Wightman,  
694 Mehdi Cherti, Theo Coombes, Aarush Katta, Clayton Mullis, Mitchell Wortsman, Patrick  
695 Schramowski, Srivatsa R Kundurthy, Katherine Crowson, Ludwig Schmidt, Robert Kaczmarczyk,  
696 and Jenia Jitsev. LAION-5b: An open large-scale dataset for training next generation image-text  
697 models. In *Thirty-sixth Conference on Neural Information Processing Systems Datasets and*  
698 *Benchmarks Track*, 2022.
- 700 Vikash Sehwar, Xianghao Kong, Jingtao Li, Michael Spranger, and Lingjuan Lyu. Stretching each  
701 dollar: Diffusion training from scratch on a micro-budget. *arXiv preprint arXiv:2407.15811*,  
2024.

- 702 Piyush Sharma, Nan Ding, Sebastian Goodman, and Radu Soricut. Conceptual captions: A cleaned,  
703 hypernymed, image alt-text dataset for automatic image captioning. In *Proceedings of ACL*, 2018.  
704
- 705 Shelly Sheynin, Adam Polyak, Uriel Singer, Yuval Kirstain, Amit Zohar, Oron Ashual, Devi Parikh,  
706 and Yaniv Taigman. Emu edit: Precise image editing via recognition and generation tasks. In *Pro-*  
707 *ceedings of the IEEE/CVF Conference on Computer Vision and Pattern Recognition*, pp. 8871–  
708 8879, 2024.
- 709 Jianlin Su, Murtadha Ahmed, Yu Lu, Shengfeng Pan, Wen Bo, and Yunfeng Liu. Roformer: En-  
710 hanced transformer with rotary position embedding. *Neurocomputing*, 568:127063, 2024.  
711
- 712 Peize Sun, Yi Jiang, Shoufa Chen, Shilong Zhang, Bingyue Peng, Ping Luo, and Zehuan Yuan.  
713 Autoregressive model beats diffusion: Llama for scalable image generation. *arXiv preprint*  
714 *arXiv:2406.06525*, 2024.
- 715 Hugo Touvron, Thibaut Lavril, Gautier Izacard, Xavier Martinet, Marie-Anne Lachaux, Timothée  
716 Lacroix, Baptiste Rozière, Naman Goyal, Eric Hambro, Faisal Azhar, et al. Llama: Open and  
717 efficient foundation language models. *arXiv preprint arXiv:2302.13971*, 2023.
- 718 Narek Tumanyan, Michal Geyer, Shai Bagon, and Tali Dekel. Plug-and-play diffusion features for  
719 text-driven image-to-image translation. In *Proceedings of the IEEE/CVF Conference on Com-*  
720 *puter Vision and Pattern Recognition*, pp. 1921–1930, 2023.  
721
- 722 Xiaoshi Wu, Yiming Hao, Keqiang Sun, Yixiong Chen, Feng Zhu, Rui Zhao, and Hongsheng Li.  
723 Human preference score v2: A solid benchmark for evaluating human preferences of text-to-  
724 image synthesis. *arXiv preprint arXiv:2306.09341*, 2023.
- 725 Tianwei Yin, Michaël Gharbi, Taesung Park, Richard Zhang, Eli Shechtman, Fredo Durand, and  
726 William T Freeman. Improved distribution matching distillation for fast image synthesis. *arXiv*  
727 *preprint arXiv:2405.14867*, 2024.  
728
- 729 Jiahui Yu, Xin Li, Jing Yu Koh, Han Zhang, Ruoming Pang, James Qin, Alexander Ku, Yuanzhong  
730 Xu, Jason Baldridge, and Yonghui Wu. Vector-quantized image modeling with improved VQ-  
731 GAN. In *International Conference on Learning Representations (ICLR)*, 2022a.
- 732 Jiahui Yu, Yuanzhong Xu, Jing Yu Koh, Thang Luong, Gunjan Baid, Zirui Wang, Vijay Vasudevan,  
733 Alexander Ku, Yinfei Yang, Burcu Karagol Ayan, et al. Scaling autoregressive models for content-  
734 rich text-to-image generation. *arXiv preprint arXiv:2206.10789*, 2(3):5, 2022b.
- 735 Qiying Yu, Quan Sun, Xiaosong Zhang, Yufeng Cui, Fan Zhang, Yue Cao, Xinlong Wang, and  
736 Jingjing Liu. Capsfusion: Rethinking image-text data at scale. In *Proceedings of the IEEE/CVF*  
737 *Conference on Computer Vision and Pattern Recognition*, pp. 14022–14032, 2024.  
738
- 739 Kai Zhang, Lingbo Mo, Wenhui Chen, Huan Sun, and Yu Su. Magicbrush: A manually annotated  
740 dataset for instruction-guided image editing. *Advances in Neural Information Processing Systems*,  
741 36, 2024a.
- 742 Sixian Zhang, Bohan Wang, Junqiang Wu, Yan Li, Tingting Gao, Di Zhang, and Zhongyuan Wang.  
743 Learning multi-dimensional human preference for text-to-image generation. In *Proceedings of*  
744 *the IEEE/CVF Conference on Computer Vision and Pattern Recognition (CVPR)*, pp. 8018–8027,  
745 2024b.  
746
- 747 Le Zhuo, Ruoyi Du, Han Xiao, Yangguang Li, Dongyang Liu, Rongjie Huang, Wenze Liu, Lirui  
748 Zhao, Fu-Yun Wang, Zhanyu Ma, et al. Lumina-next: Making lumina-t2x stronger and faster  
749 with next-dit. *arXiv preprint arXiv:2406.18583*, 2024.  
750  
751  
752  
753  
754  
755



## A MODEL NAME ORIGIN

The name “Meissonic” is derived from a combination of the renowned French painter Ernest Meissonier and the term “sonic”. Ernest Meissonier is celebrated for his meticulous attention to detail and his ability to capture dynamic moments in art. The addition of “sonic” evokes a sense of speed and modernity, highlighting the model’s capabilities in efficient image synthesis and transformation.

## B RELATED WORK

**Diffusion-based Image Generation.** Diffusion models have achieved remarkable advances in image generation, with notable contributions like Stable Diffusion (Rombach et al., 2022b), and the more recent SDXL (Podell et al., 2024), often driven by large-scale datasets. These models move beyond pixel-level operations by working within compressed latent spaces, forming what we now recognize as latent diffusion models (Luo et al., 2023; Podell et al., 2024). SDXL represents a significant leap in this domain, introducing micro-conditions and multi-aspect training to gain greater control over image generation, which has inspired a wide range of derivative models in the community, such as Deliberate (per, 2024) and RealVisXL (rea, 2024).

The integration of transformer architectures has also become more prevalent, with models like DiT (Peebles & Xie, 2023) and U-ViT (Bao et al., 2023) demonstrating the potential of diffusion transformers in this field. SD3 (Esser et al., 2024), which combines diffusion transformers with flow matching at an impressive scale of 8B parameters, underscores the scalability and potential of the multimodal transformer-based diffusion backbone. Despite these advances, diffusion models still face challenges, particularly their reliance on acceleration techniques (Sauer et al., 2023; Luo et al., 2023; Yin et al., 2024) to speed up inference, making them cumbersome for real-time applications. Additionally, the quantization of diffusion transformers has proven less straightforward than with large language models (Li et al., 2023). The research community continues to explore better paradigms for image generation. Addressing these limitations, our work aims to contribute an efficient, high-quality alternative in the form of Meissonic.

**Token-based Image Generation.** Token-based autoregressive transformers (Lee et al., 2022; Chen et al., 2018; Yu et al., 2022b), first validated by VQ-GAN (Esser et al., 2021b), have shown considerable promise for image generation. However, these methods are inherently computationally demanding, requiring the prediction of hundreds to thousands of tokens to form a single image. As a pioneering work, MaskGIT (Chang et al., 2022) challenged this paradigm by introducing a masked image modeling (MIM) approach, achieving competitive fidelity and diversity in class-conditional image generation. Building on this, MUSE (Chang et al., 2023) extended MIM to text-to-image synthesis, scaling up to 3B parameters and achieving remarkable performance.

MUSE demonstrates the viability of non-autoregressive token-based models, but it encountered limitations in generating high-resolution images, capping at  $512 \times 512$ , and lagging behind SDXL (Podell et al., 2023) in terms of fidelity and text-image alignment. Meissonic advances the performance of token-based models beyond what latent diffusion methods have achieved, effectively pushing the envelope in terms of both quality and resolution in the text-to-image synthesis landscape with the MIM method.

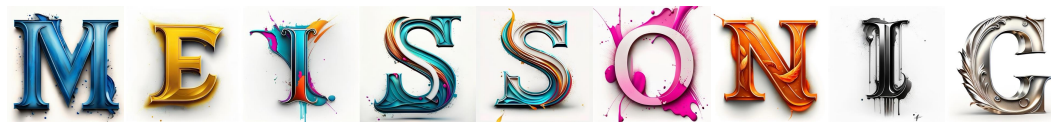

Figure 10: Zero-shot generation of stylized letters. Meissonic can synthesize individual letters to form the word “MEISSONIC.” *Prompt:* A post featuring a [COLOR] '[LETTER]' painted on top.

## C APPLICATIONS

We present the letter synthesis capability of Meissonic in Figure 10.

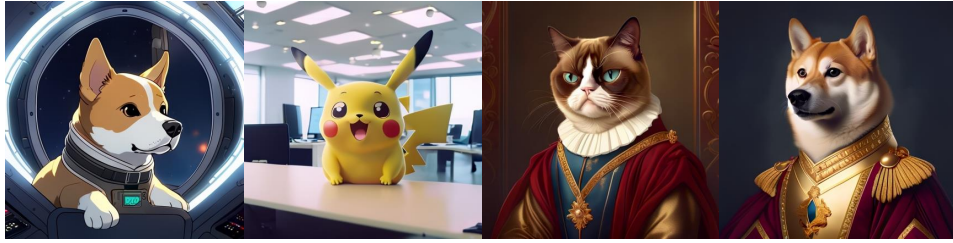

Figure 11: Memes generated by Meissonic.

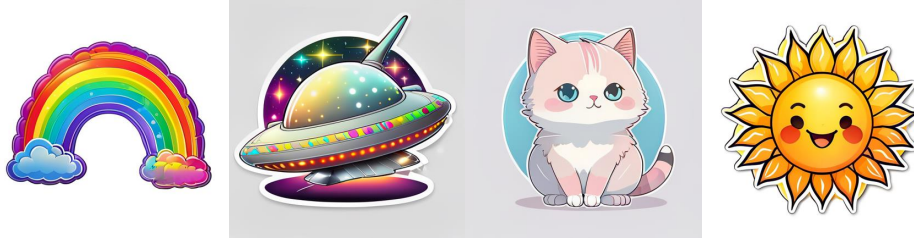

Figure 12: Cartoon Stickers generated by Meissonic.

We present the combination capability of complex concepts of Meissonic in Figure 1.

We present meme generation in Figure 11.

We present cartoon sticker generation in Figure 12.

## D PERFORMANCE COMPARISONS FOR COMPLEX VERSUS SIMPLE PROMPTS

We present performance comparisons for complex prompts versus simple prompts in Figure 13.

## E PERFORMANCE COMPARISONS WITH DIFFERENT NUMBERS OF INFERENCE STEPS AND CLASSIFIER FREE GUIDANCE (CFG)

We present performance comparisons with different numbers of inference steps and Classifier Free Guidance (CFG) in Figure 14,15,16,17,18,19.

864  
865  
866  
867  
868  
869  
870  
871  
872  
873  
874  
875  
876  
877  
878  
879  
880  
881  
882  
883  
884  
885  
886  
887  
888  
889  
890  
891  
892  
893  
894  
895  
896  
897  
898  
899  
900  
901  
902  
903  
904  
905  
906  
907  
908  
909  
910  
911  
912  
913  
914  
915  
916  
917

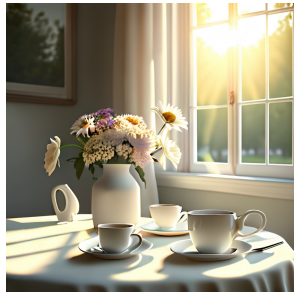

A white table with a vase of flowers and a cup of coffee on top of it, accompanied by a plate of buttery croissants, a folded linen napkin, and a faint ray of sunlight streaming through a nearby window in a cozy dining room.

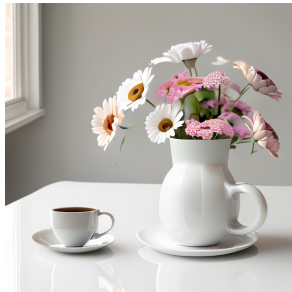

A white table with a vase of flowers and a cup of coffee on top of it.

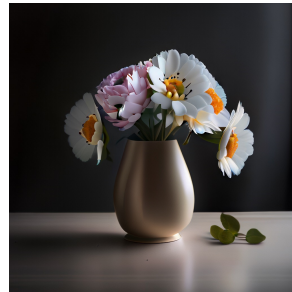

Table flowers.

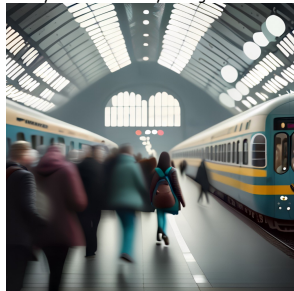

A busy train station with people hurrying along the platforms, some carrying luggage, while a sleek modern train is arriving, its headlights cutting through the slight morning haze, under a vast glass roof with beams of sunlight streaming in.

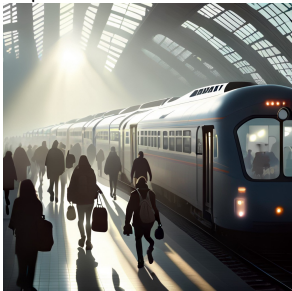

A busy train station with people hurrying along the platforms.

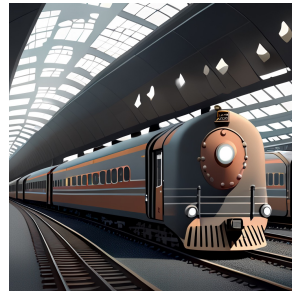

Train station.

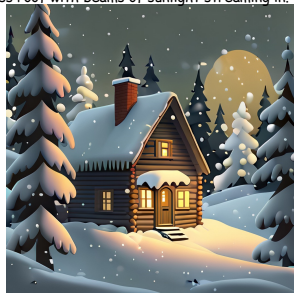

A cozy wooden cabin covered in a blanket of snow, with smoke rising from its chimney, surrounded by tall pine trees, as soft snowflakes fall from the gray sky, and a warm yellow glow from the windows invites you in.

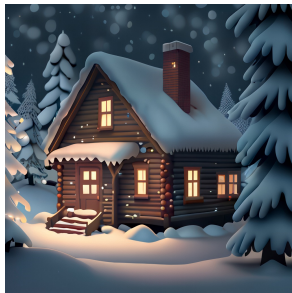

A cozy wooden cabin covered in a blanket of snow.

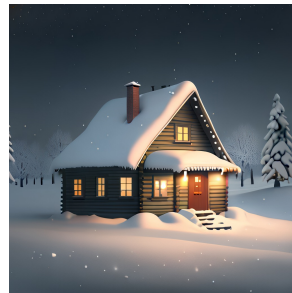

Snow cabin.

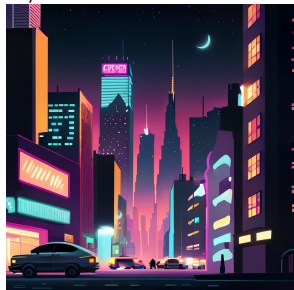

A vibrant city at night with skyscrapers illuminated by neon lights, busy streets filled with cars and people, and a towering billboard flashing colorful advertisements, while a clear night sky reveals the faint twinkle of distant stars.

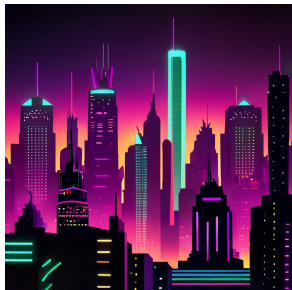

A vibrant city at night with skyscrapers illuminated by neon lights.

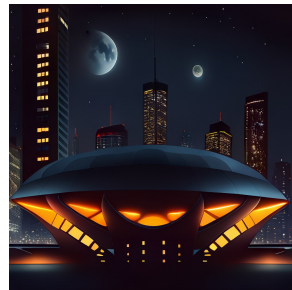

Night city.

Figure 13: Performance Comparisons for Complex versus Simple Prompts



918  
 919  
 920  
 921  
 922  
 923  
 924  
 925  
 926  
 927  
 928  
 929  
 930  
 931  
 932  
 933  
 934  
 935  
 936  
 937  
 938  
 939  
 940  
 941  
 942  
 943  
 944  
 945  
 946  
 947  
 948  
 949  
 950  
 951  
 952  
 953  
 954  
 955  
 956  
 957  
 958  
 959  
 960  
 961  
 962  
 963  
 964  
 965  
 966  
 967  
 968  
 969  
 970  
 971

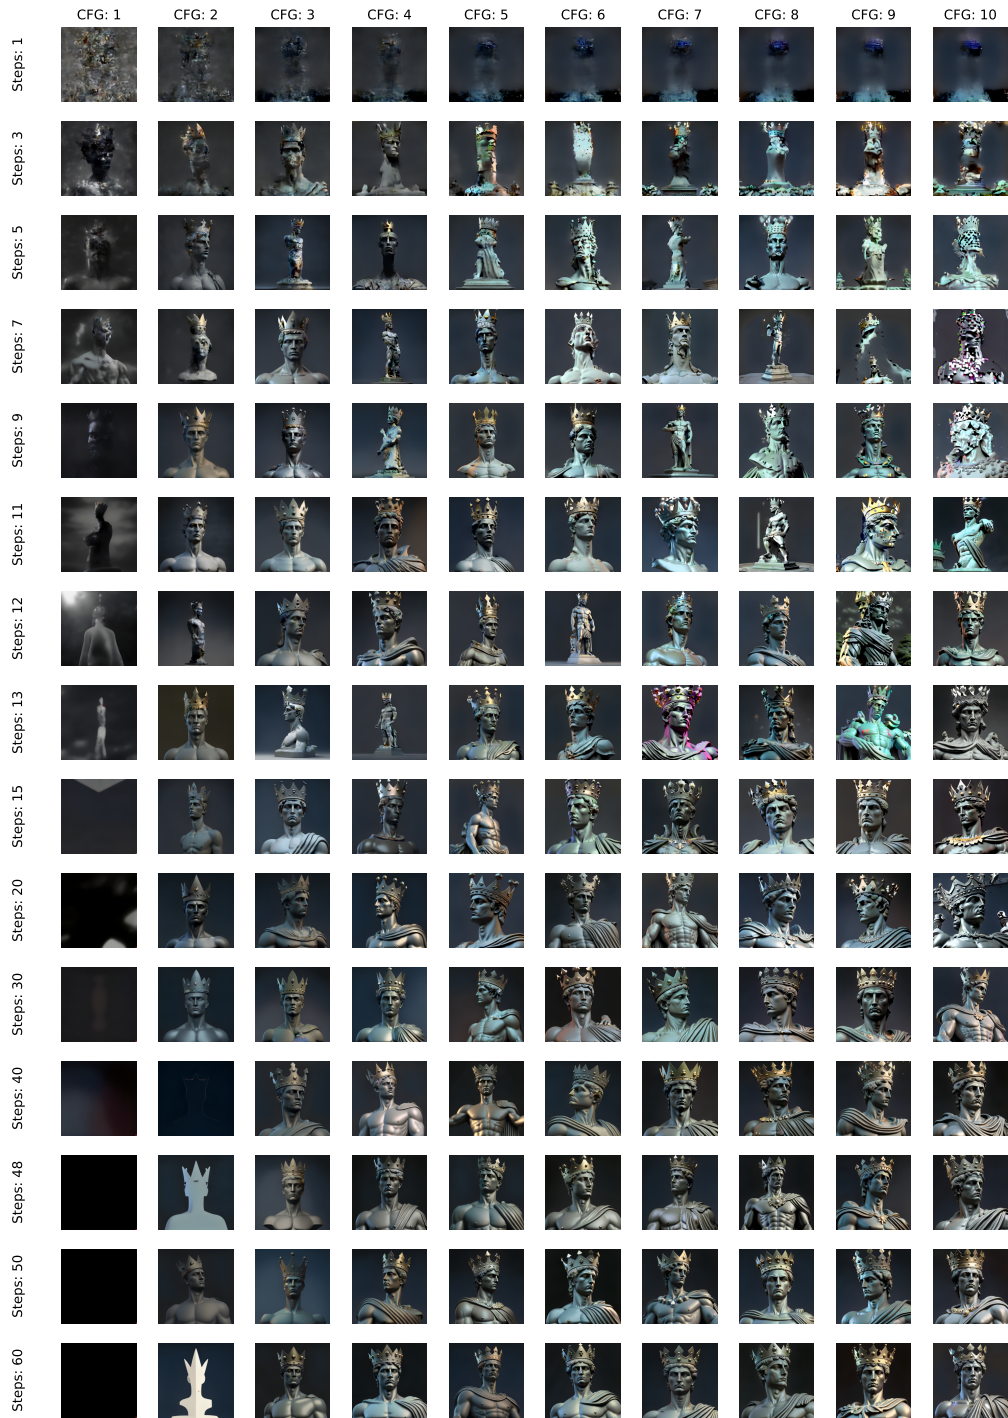

Figure 14: Performance Comparisons with Different Numbers of Inference Steps and Classifier Free Guidance (CFG). *Prompt*: A statue of a man with a crown on his head.



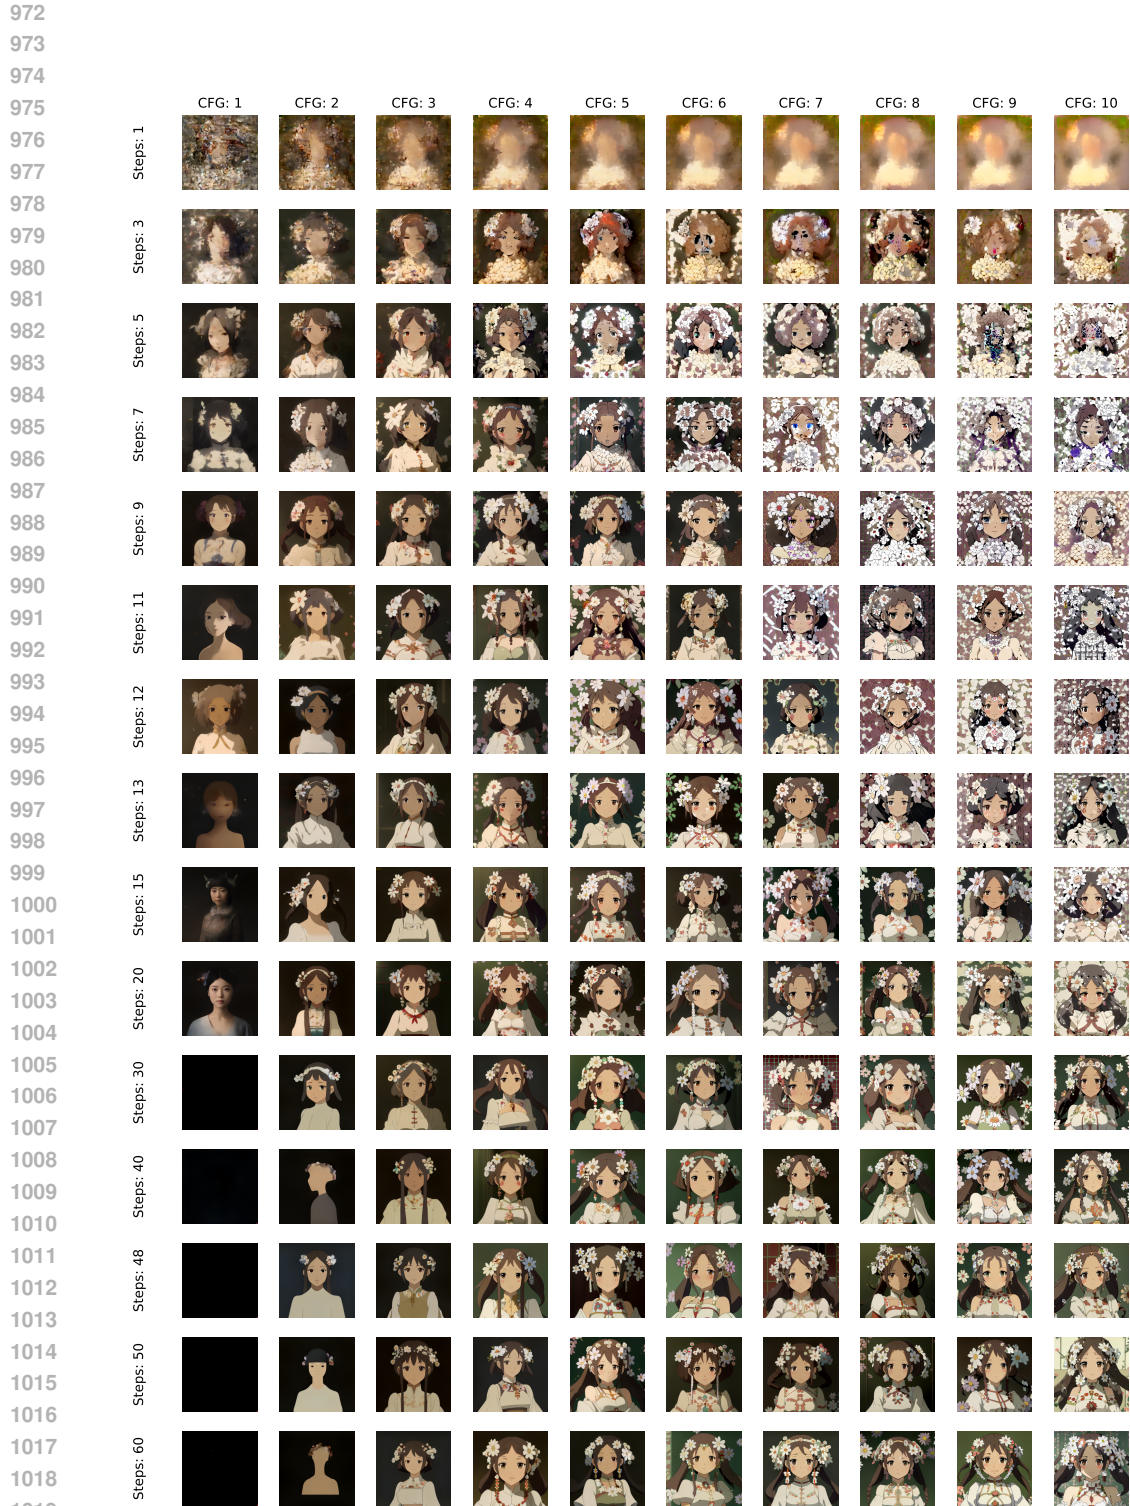

1021 Figure 15: Performance Comparisons with Different Numbers of Inference Steps and Classifier  
1022 Free Guidance (CFG). *Prompt*: Studio photo portrait of Lain Iwakura from Serial Experiments Lain  
1023 wearing floral garlands over her traditional dress.  
1024  
1025

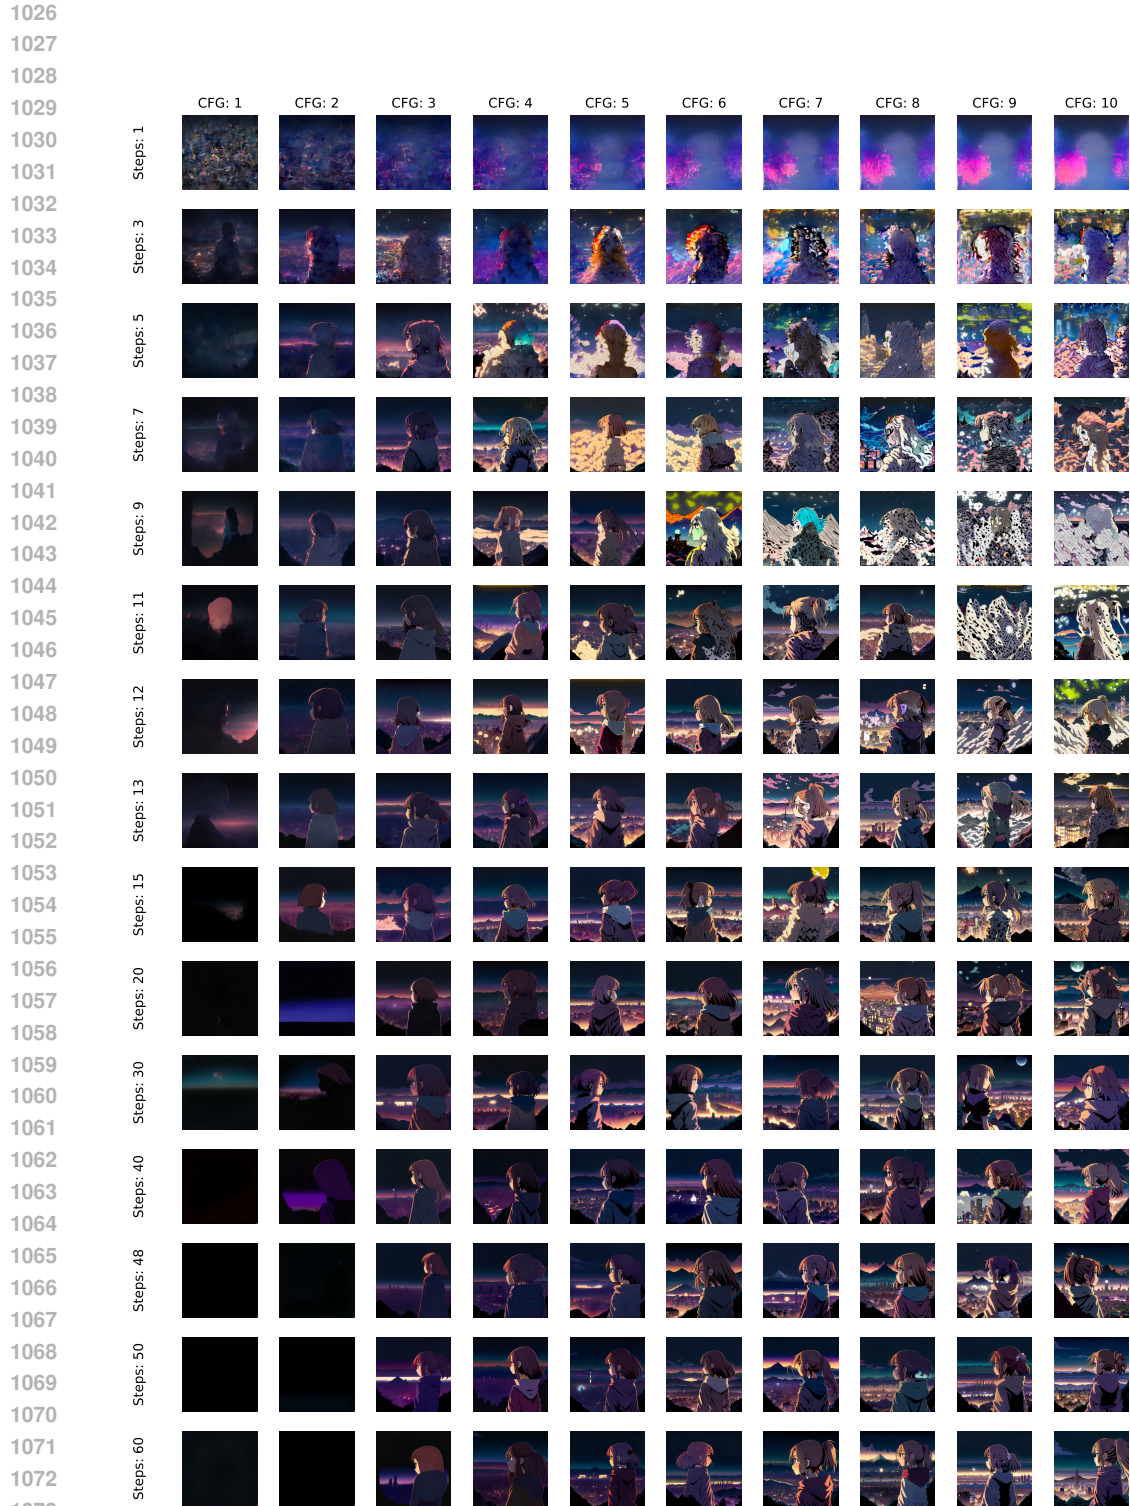

1075 Figure 16: Performance Comparisons with Different Numbers of Inference Steps and Classifier  
 1076 Free Guidance (CFG). *Prompt*: A girl gazes at a city from a mountain at night in a colored manga  
 1077 illustration by Diego Facio.  
 1078  
 1079



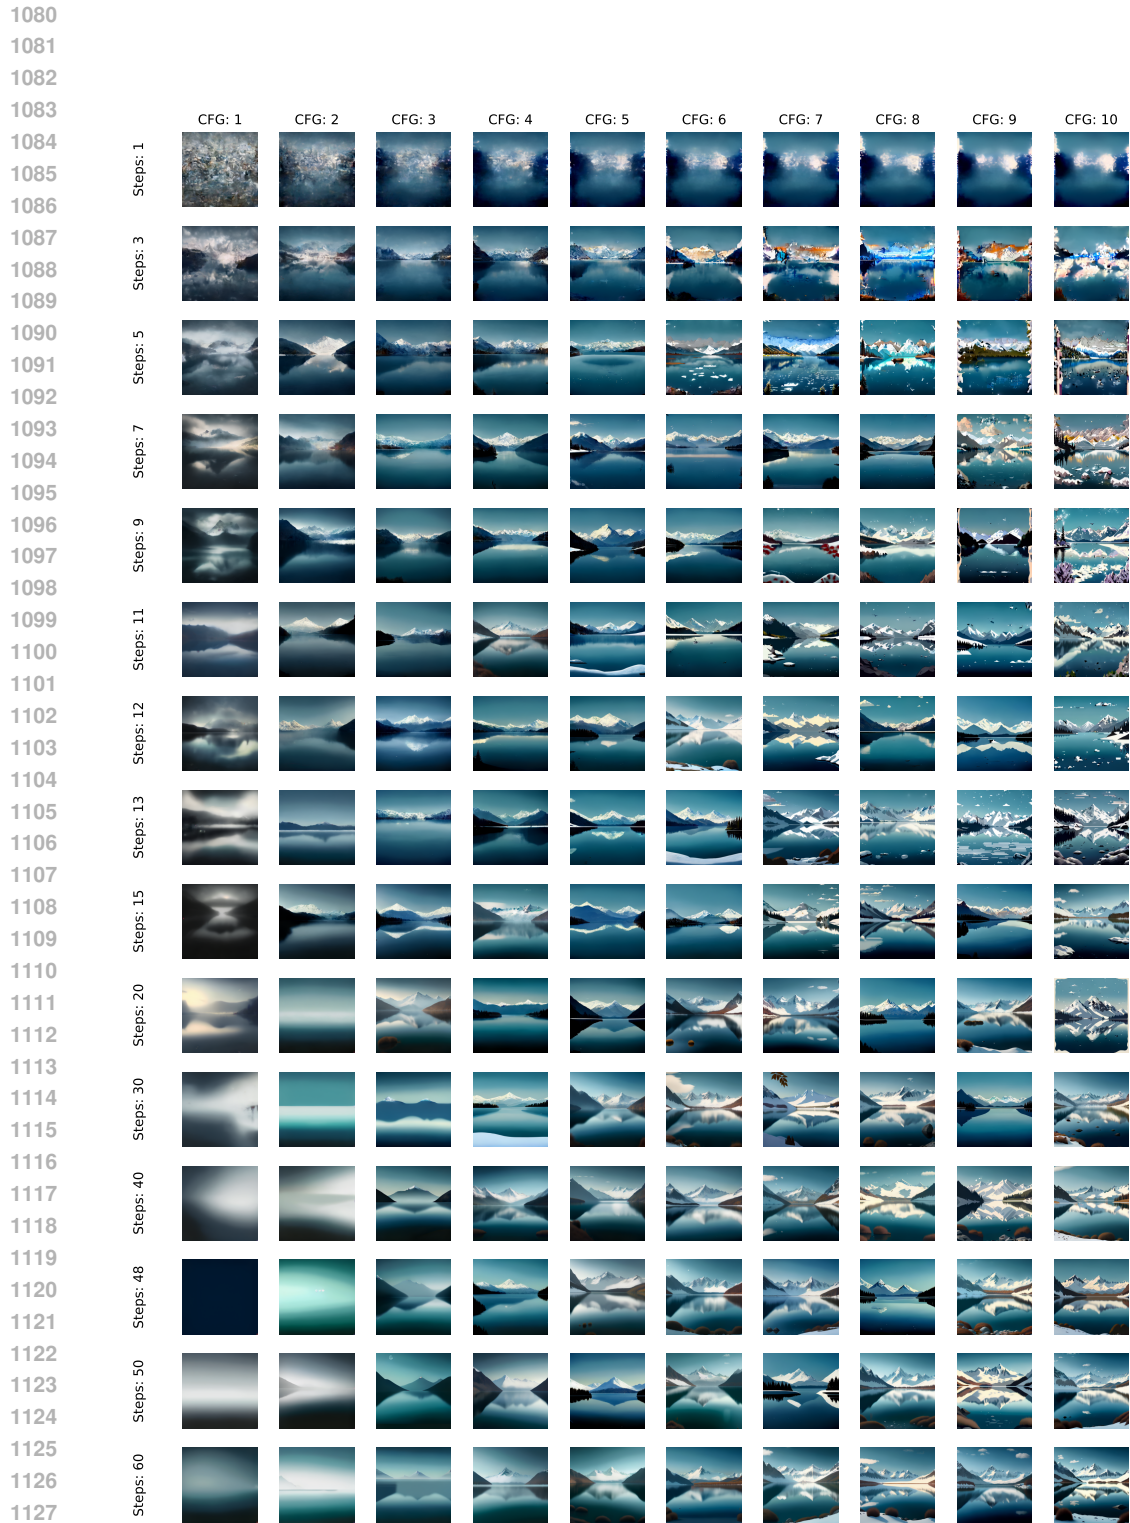

Figure 17: Performance Comparisons with Different Numbers of Inference Steps and Classifier Free Guidance (CFG). *Prompt*: A tranquil lake surrounded by snow-capped mountains under a clear sky.

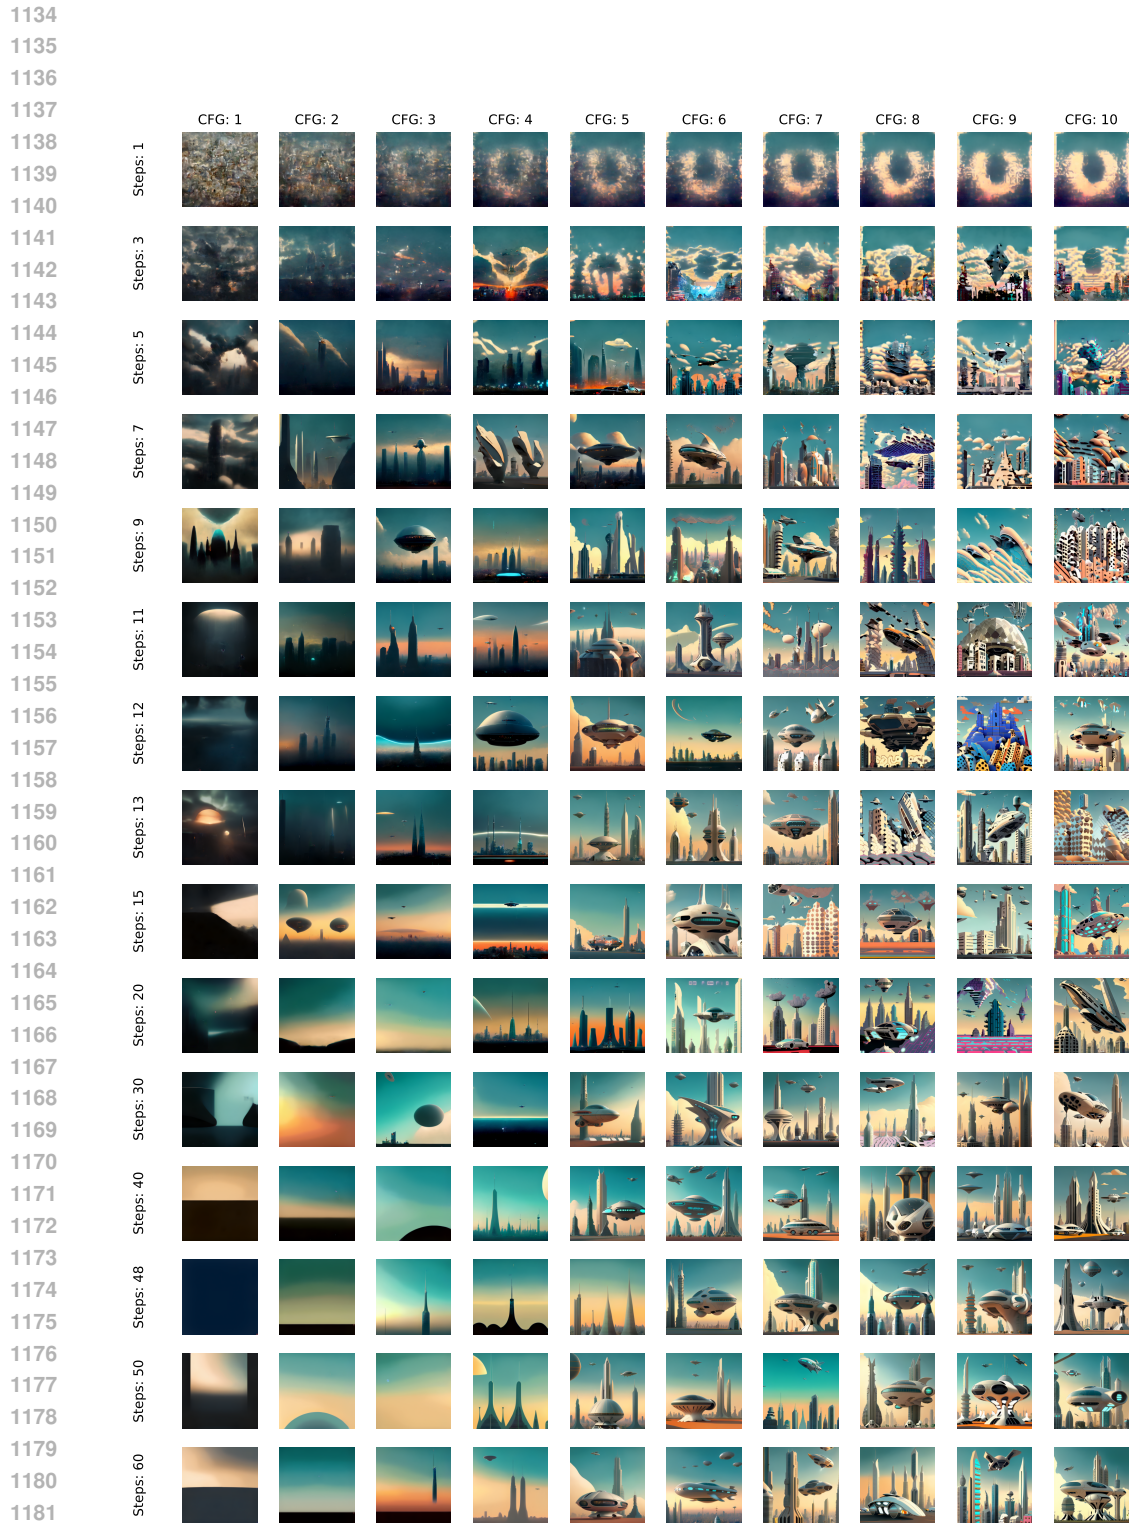

Figure 18: Performance Comparisons with Different Numbers of Inference Steps and Classifier Free Guidance (CFG). *Prompt*: A futuristic cityscape with hovering vehicles and towering structures.



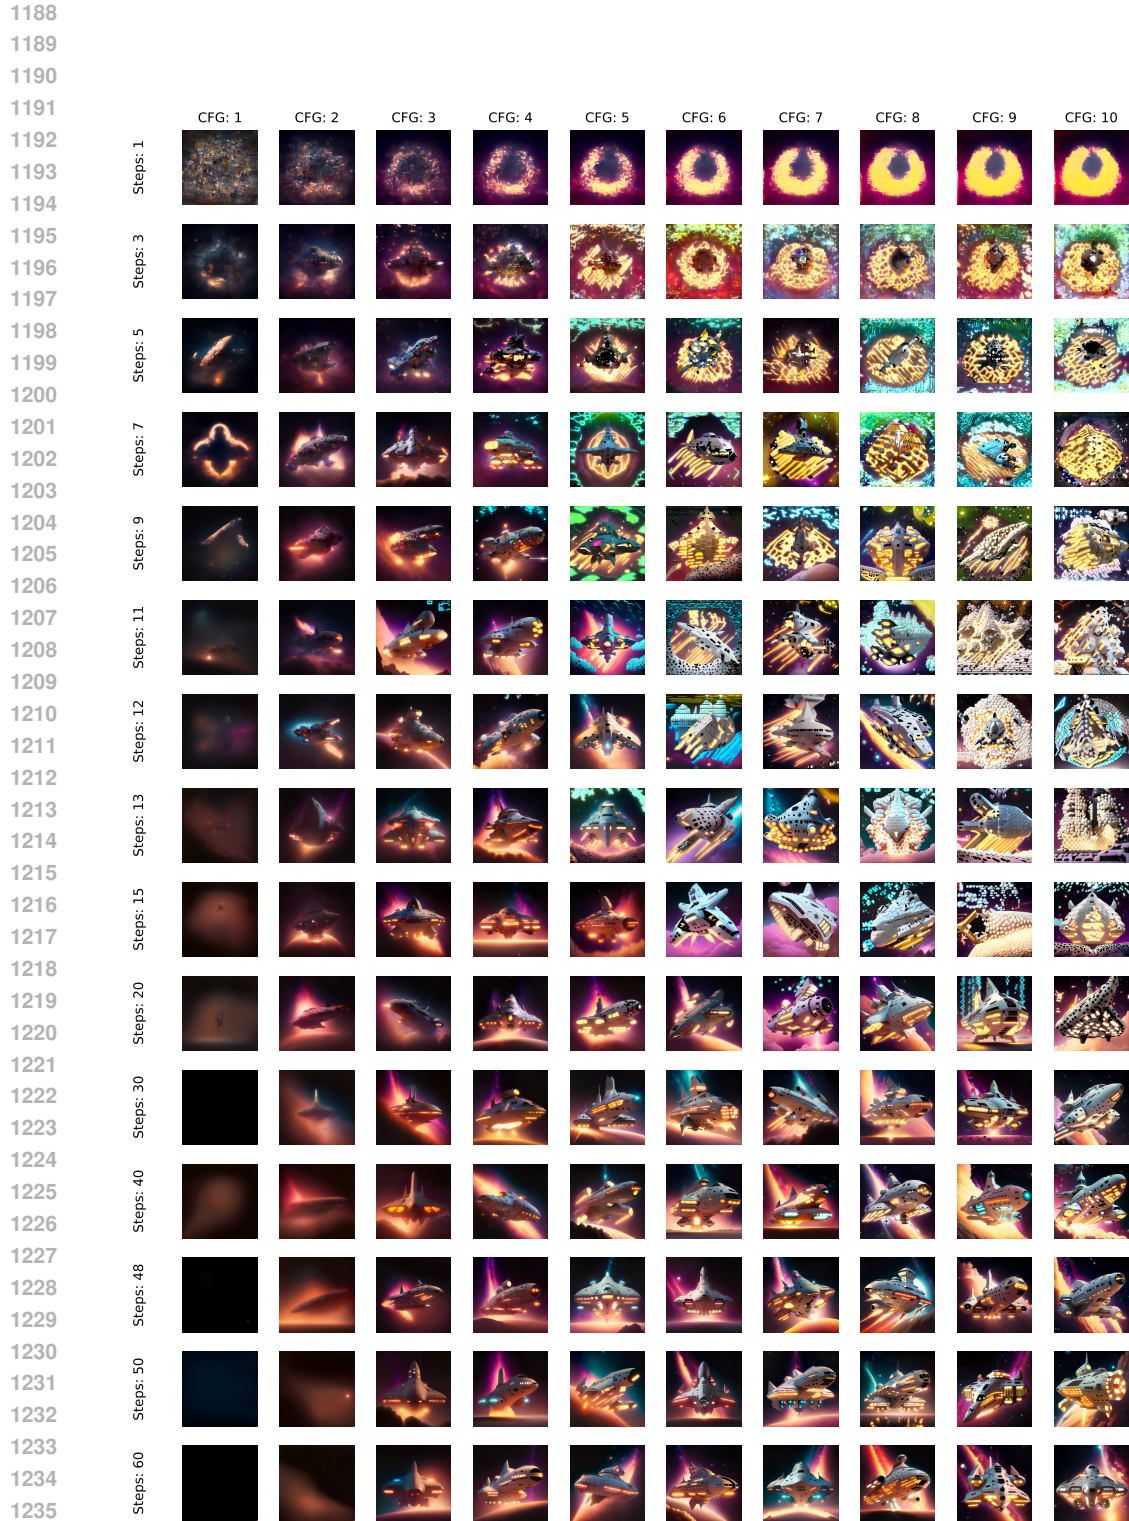

Figure 19: Performance Comparisons with Different Numbers of Inference Steps and Classifier Free Guidance (CFG). *Prompt: A massive starship docked in a glowing nebula.*

## F MORE COMPARISONS FOR ZERO-SHOT IMAGE EDITING ABILITY

To ensure fair evaluations of zero-shot capabilities with SD1.5 and SDXL, we utilize Null-Text Inversion (Mokady et al., 2023) for zero-shot editing with our method, taking into account that other methods have been extensively trained on editing datasets. The configurations used for Null-Text Inversion, along with any undocumented parameters, align with those provided in the [official code repository](#). The primary parameters are outlined as follows:

- `cross_replace_steps.default` = 0.8
- `self_replace_steps` = 0.5
- `blend_words` = None
- `equilizer_params` = None

For consistency, we used the recommended  $512 \times 512$  resolution for editing and ran tests using `torch.float32`, which is the official setting for Null-Text Inversion. On A6000 GPUs (48 GB), the execution of MagicBrush (Zhang et al., 2024a) took approximately 36 hours for SD1.5 and 60 hours for SDXL. The runtime for Emu-Edit was significantly longer. Given the extensive computation, we randomly sampled 500 examples per benchmark for testing.

We present more comparisons for zero-shot image editing ability on EMU-Edit in Table 7.

|                         | CLIP-I $\uparrow$ | CLIP-T $\uparrow$ | DINO $\uparrow$ | L1 $\downarrow$ | CLIPdir $\uparrow$ |
|-------------------------|-------------------|-------------------|-----------------|-----------------|--------------------|
| SD 1.5 + Null-Text Inv. | 0.780             | 0.240             | 0.637           | 0.159           | 0.096              |
| SDXL + Null-Text Inv.   | 0.787             | 0.238             | 0.653           | 0.146           | 0.085              |
| Meissonic-512 (Ours)    | 0.791             | 0.244             | 0.689           | 0.128           | 0.102              |

Table 7: EMU-Edit Results

We present more comparisons for zero-shot image editing ability on MagicBrush in Table 8.

|                         | CLIP-I $\uparrow$ | CLIP-T $\uparrow$ | DINO $\uparrow$ | L1 $\downarrow$ | CLIPdir $\uparrow$ |
|-------------------------|-------------------|-------------------|-----------------|-----------------|--------------------|
| SD 1.5 + Null-Text Inv. | 0.824             | 0.228             | 0.647           | 0.121           | 0.106              |
| SDXL + Null-Text Inv.   | 0.840             | 0.241             | 0.665           | 0.122           | 0.111              |
| Meissonic-512 (Ours)    | 0.835             | 0.248             | 0.689           | 0.115           | 0.120              |

Table 8: MagicBrush Results

Our findings indicate that due to the inherent characteristics of MIM, Meissonic exhibits faster zero-shot editing capabilities. Performance was evaluated with `batch size = 1` and `inference step = 50` (compared to Null-Text Inv., which requires 500 backpropagation steps). Tests were conducted on an A6000 GPU with 48 GB VRAM.

Besides, we present inference time comparison in Table 9.

|                   | SD 1.5 + Null-Text Inv. | SDXL + Null-Text Inv. | Meissonic-512 (Ours) |
|-------------------|-------------------------|-----------------------|----------------------|
| Time (s/10 pairs) | 1040 + 100              | 1850 + 120            | 108                  |
| GPU (GB)          | 13.4                    | 26.8                  | 5.9                  |

Table 9: Inference Time Comparison

These results demonstrate the substantial potential for reduced processing time with Meissonic.

We also present qualitative comparisons on zero-shot image editing ability in Figure 20.

## G MORE COMPARISONS WITH SDXL FOR IMAGE GENERATION ABILITY

We present more comparisons with SDXL for image generation ability in Figure 21,22,23.

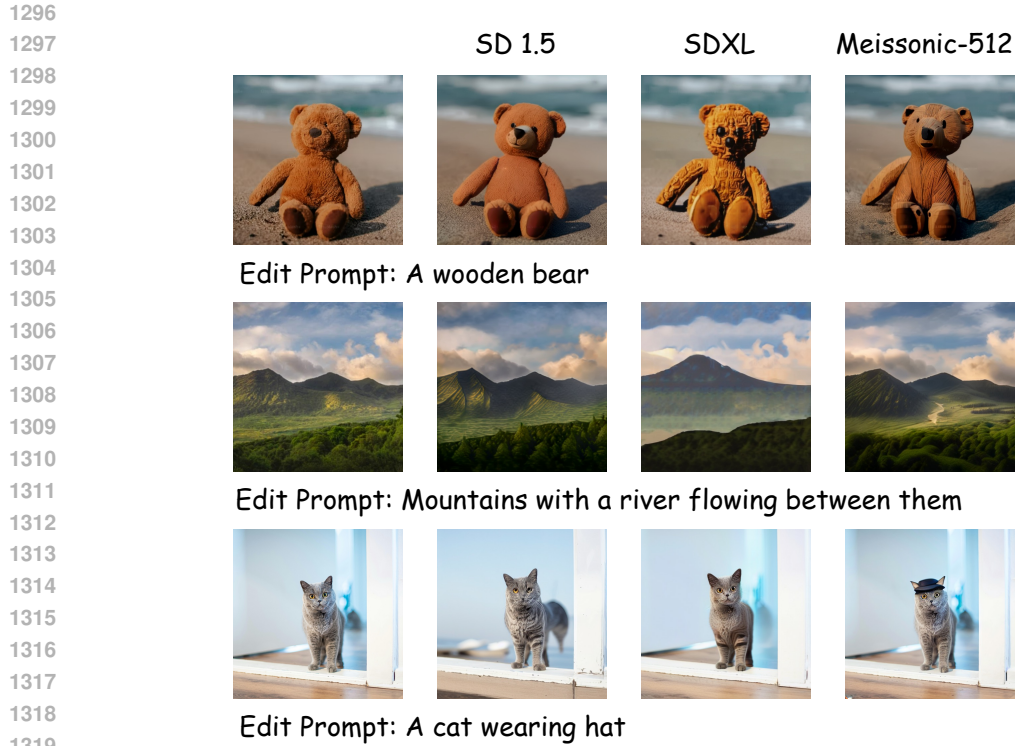

1321 Figure 20: Qualitative comparisons on zero-shot image editing ability.

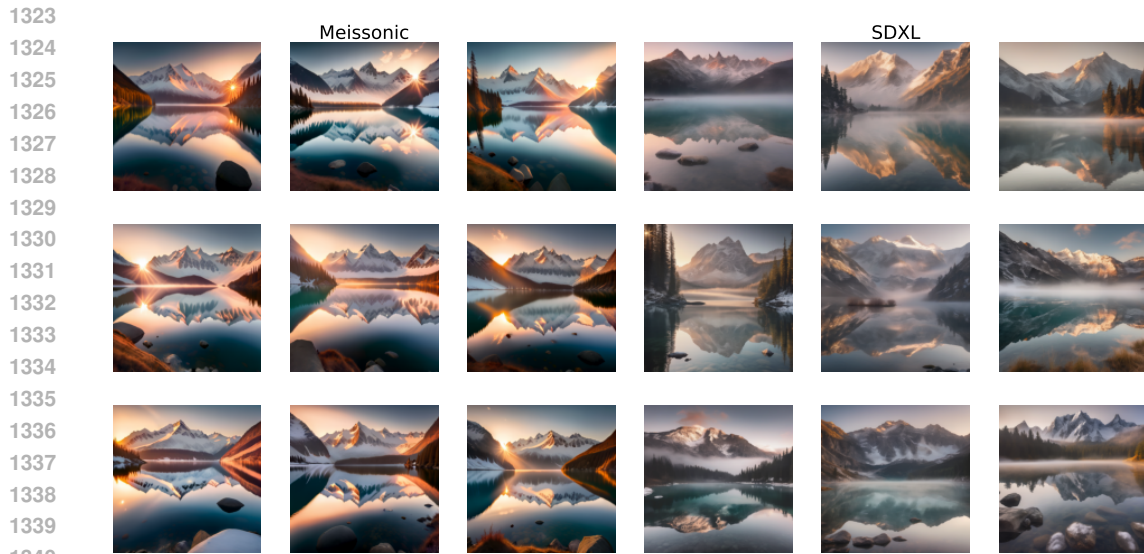

1341 Figure 21: Qualitative comparisons with SDXL for image generation ability. *Prompt*: A breathtaking photo of a serene mountain lake at sunrise, crystal-clear water reflecting the surrounding snow-capped peaks, with a soft mist floating above the surface.

1346 H ABLATION STUDY

1348 **Detailed roadmap to build Meissonic.** We present ablation studies during training Meissonic-512  
1349 in Table. 24. The HPS v2.1 (Wu et al., 2023) scores are calculated for verifying the effectiveness of



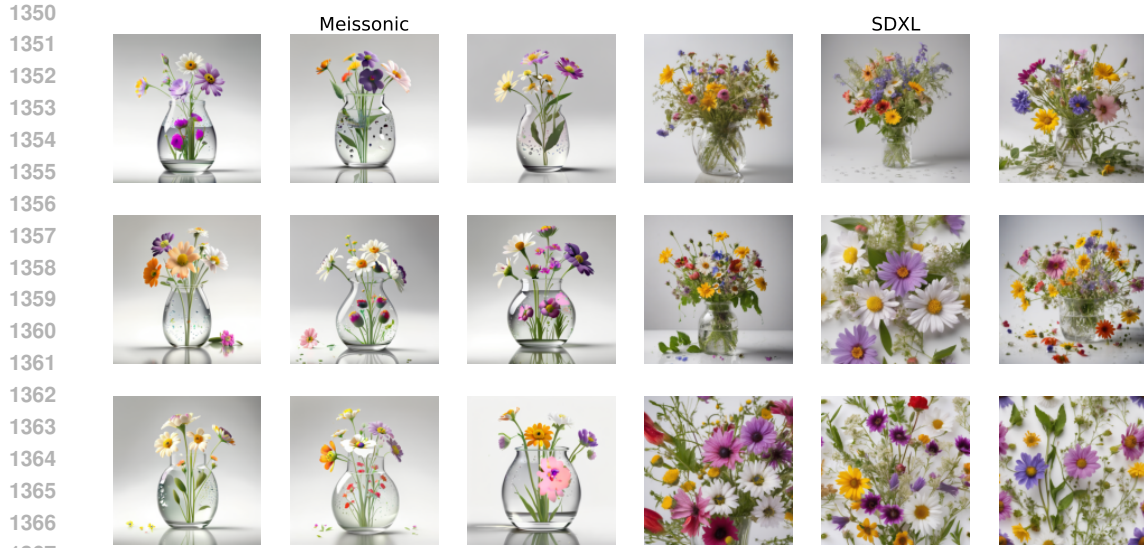

1368 Figure 22: Qualitative comparisons with SDXL for image generation ability. *Prompt*: A professional  
 1369 studio photograph of a fresh bouquet of wildflowers in a glass vase, water droplets visible on the  
 1370 petals and leaves, placed on a clean white background.  
 1371

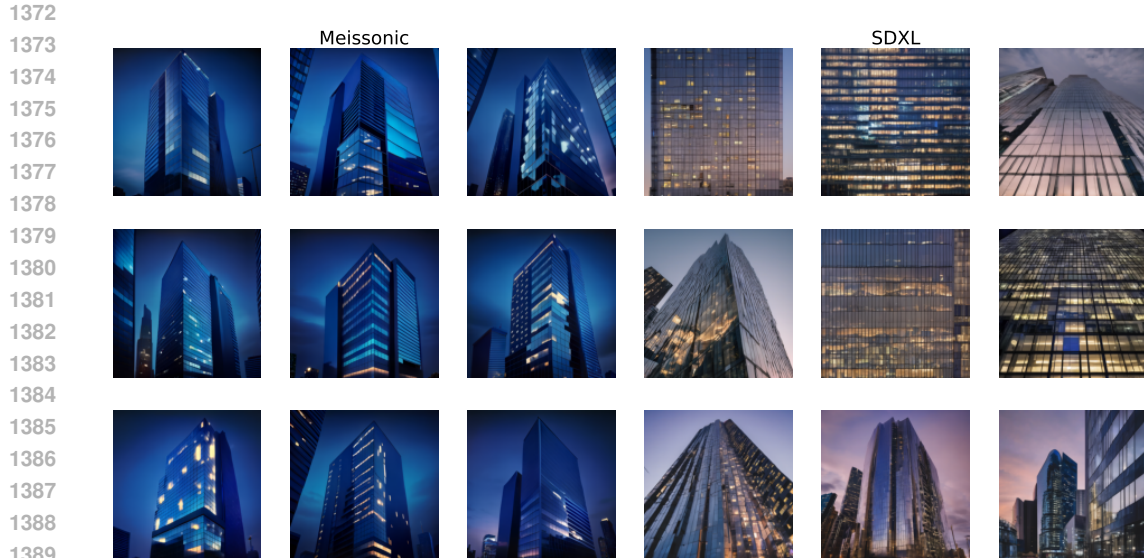

1391 Figure 23: Qualitative comparisons with SDXL for image generation ability. *Prompt*: A sharp photo  
 1392 of a modern skyscraper during blue hour, its glass facade reflecting the city lights and the deep indigo  
 1393 sky in the background.  
 1394

1395

1396 each component. Our ablations are based on training stage 2, ensuring consistency with the training  
 1397 dataset scale, model scale, and other training configurations.  
 1398

## 1399 I OUR MULTIMODAL TRANSFORMER BLOCK

1400

1401

1402 We present a detailed structure of our Multi-modal Transformer Block for MIM in Figure 25. Specif-  
 1403 ically,  $x$  denotes image embedding inputs,  $c$  denotes text embedding inputs, and  $y$  denotes conditions  
 inputs.



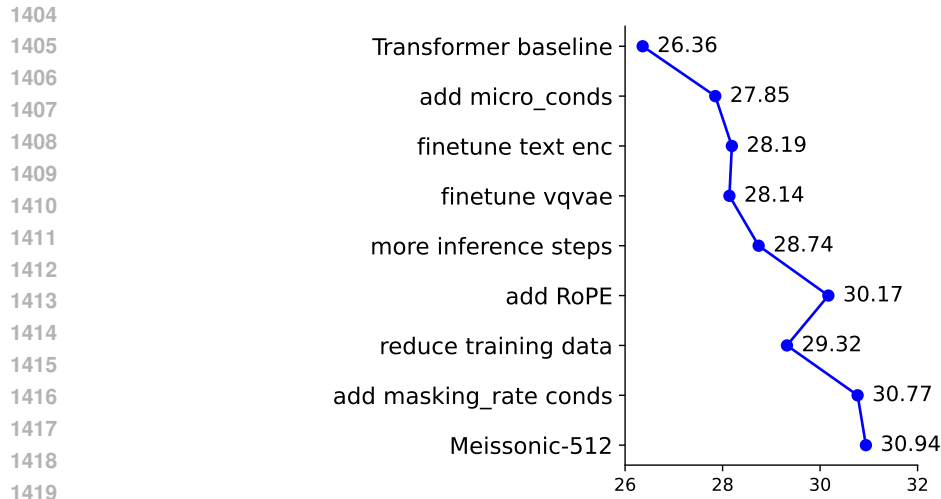

Figure 24: HPS v2.1 Score on internal 1000 prompts

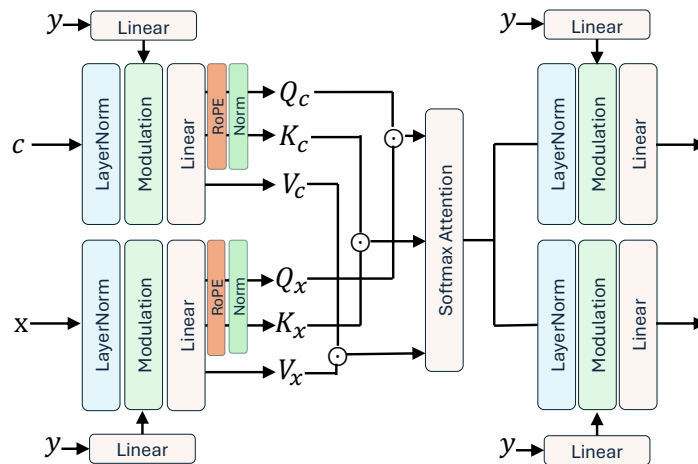

Figure 25: Multi-modal Transformer For MIM.

## J WORD CLOUD OF OUR REALUSER800 BENCHMARK

We present a word cloud image that illustrates the diverse concepts, styles, and themes encompassed within our RealUser-800 prompts benchmark in Figure 26.

## K IMAGES GENERATED DURING DIFFERENT TRAINING STAGES

We present images generated using the same prompt across Meissonic’s four training stages in Figure 27.

## L MORE EXAMPLES OF QUALITATIVE COMPARISONS

We present more examples of qualitative comparisons in Figure 28.



1512

1513

1514

1515

1516

1517

1518

1519

1520

1521

1522

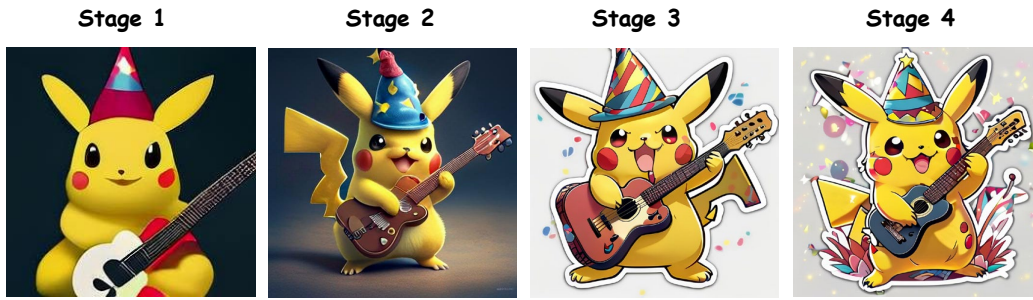

An image of a Pikachu wearing a birthday hat and playing guitar

1523

1524

1525

1526

1527

1528

1529

1530

1531

1532

1533

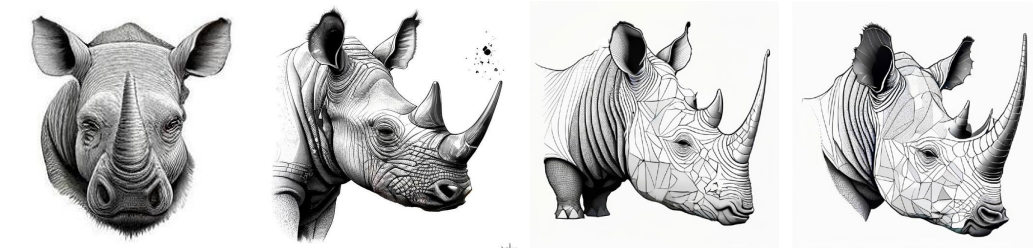

A black and white line drawing of a rhinoceros head.

1534

1535

1536

1537

1538

1539

1540

1541

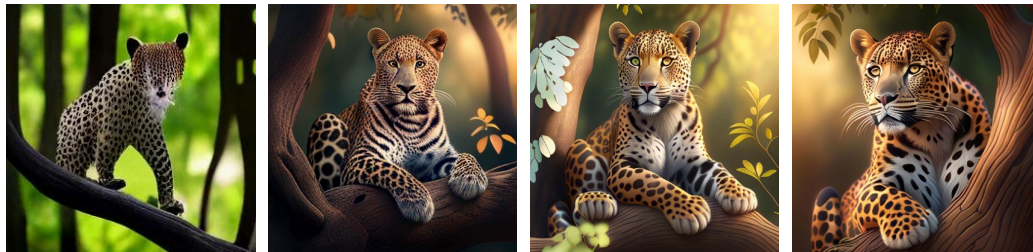

A leopard is sitting on a tree branch in a forest with its front paws resting on the trunk.

1542

1543

1544

1545

1546

1547

1548

1549

1550

1551

1552

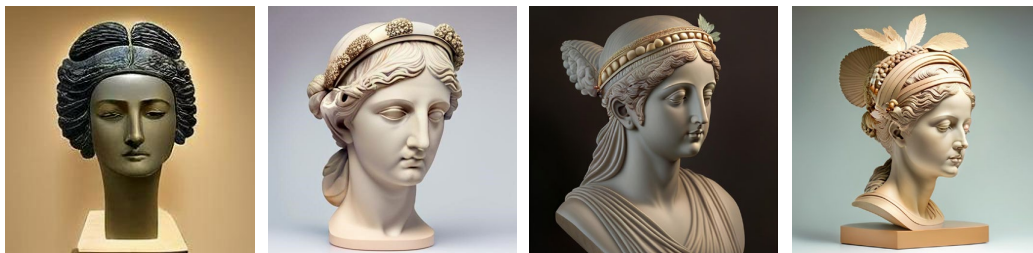

A sculpture of a Greek woman head with a headband and a head of hair.

1553

1554

1555

1556

1557

1558

1559

1560

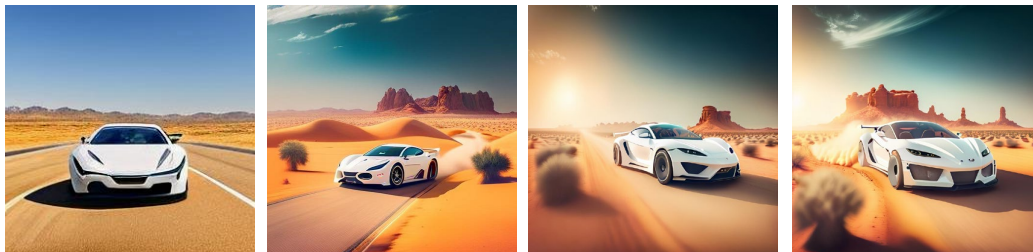

A white sports car is driving down a desert road.

1561

1562

1563

1564

1565

Figure 27: Images generated using the same prompt across Meissonic’s four training stages. The resolutions for stages 1 and 2 are  $256^2$  and  $512^2$ , respectively, while stages 3 and 4 are  $1024^2$ . For clarity and comparison, all images are displayed in a consistent layout.



1566  
 1567  
 1568  
 1569  
 1570  
 1571  
 1572  
 1573  
 1574  
 1575  
 1576  
 1577  
 1578  
 1579  
 1580  
 1581  
 1582  
 1583  
 1584  
 1585  
 1586  
 1587  
 1588  
 1589  
 1590  
 1591  
 1592  
 1593  
 1594  
 1595  
 1596  
 1597  
 1598  
 1599  
 1600  
 1601  
 1602  
 1603  
 1604  
 1605  
 1606  
 1607  
 1608  
 1609  
 1610  
 1611  
 1612  
 1613  
 1614  
 1615  
 1616  
 1617  
 1618  
 1619

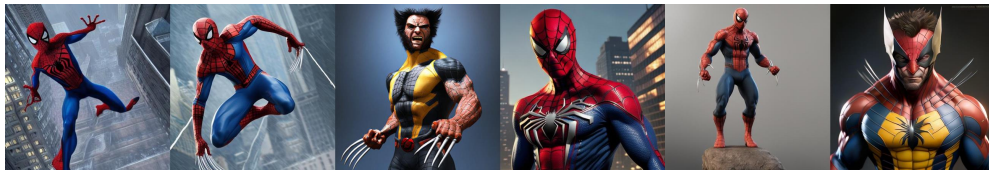

Spiderman as Wolverine with detailed muscular features and a full face, trending on multiple art platforms, created with hyperdetailed Unreal Engine, and optimized for high resolution viewing.

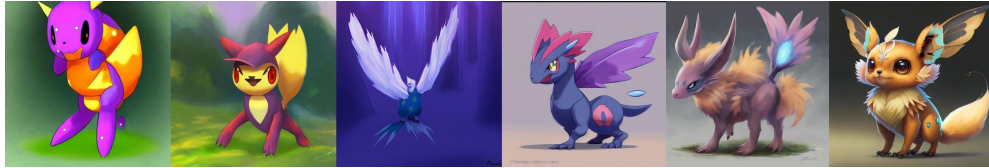

A digital painting of a Pokémon named Faerow in a concept art style.

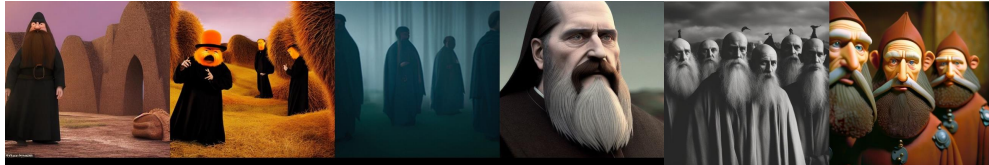

The image features Breton monks resembling Rasputin from The Lorax, with cinematic lighting and a shallow depth of field.

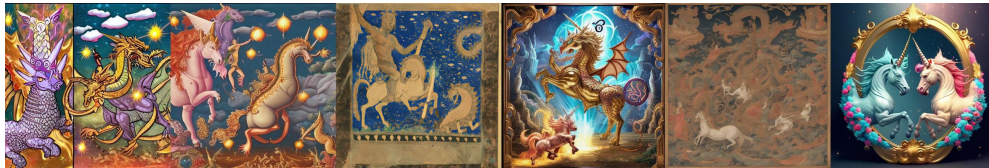

The image depicts a God smashing mirrors, while a detailed unicom-dragon is present in the scene.

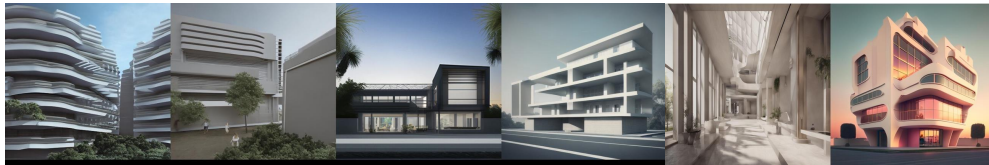

Architecture render with pleasing aesthetics.

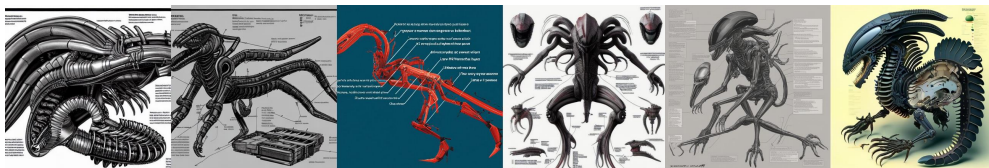

Exploded view diagram of a xenomorph.

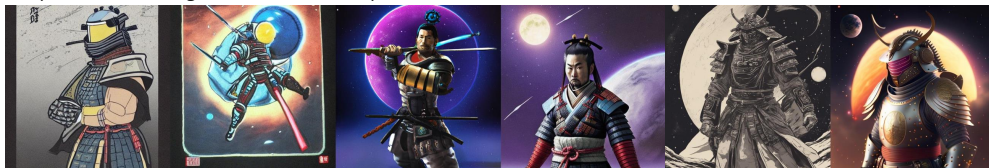

A samurai in space.

SD 1.5

SD 2.1

DeepFloyd-XL

Deliberate

SDXL 1.0

Meissonic

Figure 28: Qualitative Comparisons with SD 1.5, SD 2.1, DeepFloyd-XL, Deliberate, and SDXL.



1620  
1621  
1622  
1623  
1624  
1625  
1626  
1627  
1628  
1629  
1630  
1631  
1632  
1633  
1634  
1635  
1636  
1637  
1638  
1639  
1640  
1641  
1642  
1643  
1644  
1645  
1646  
1647  
1648  
1649  
1650  
1651  
1652  
1653  
1654  
1655  
1656  
1657  
1658  
1659  
1660  
1661  
1662  
1663  
1664  
1665  
1666  
1667  
1668  
1669  
1670  
1671  
1672  
1673

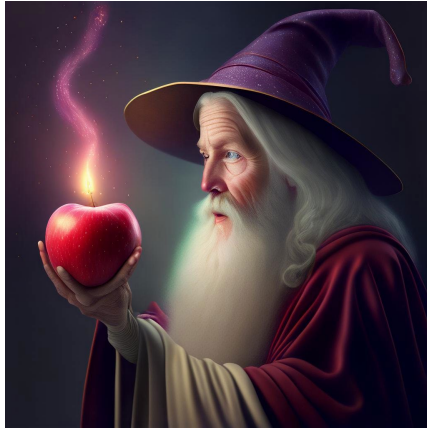

The wizard chants a spell over the apple

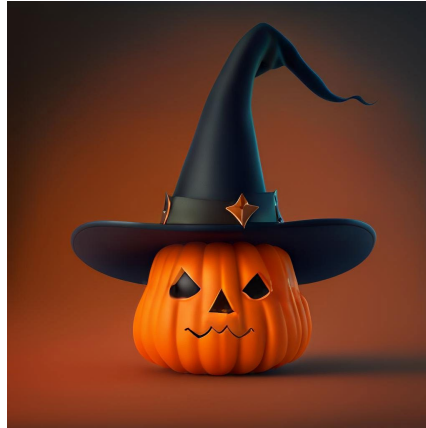

Pumpkin head wearing black wizard hat

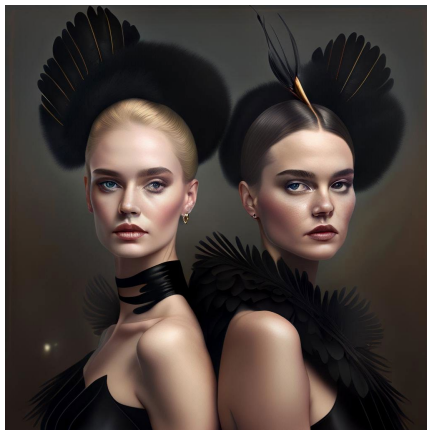

Two women in black dresses with feathers on their heads.

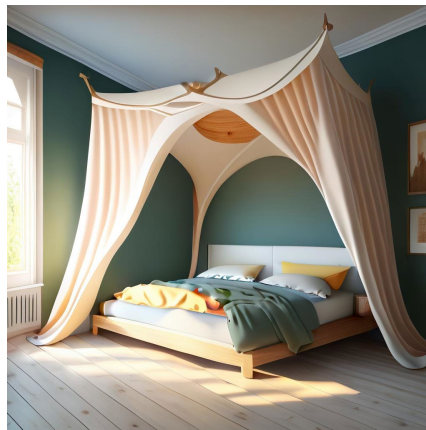

A bedroom with a canopy bed and a wooden floor

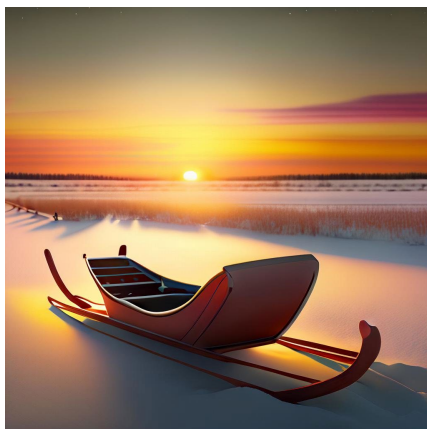

A sled sits in a field with a sunset in the background.

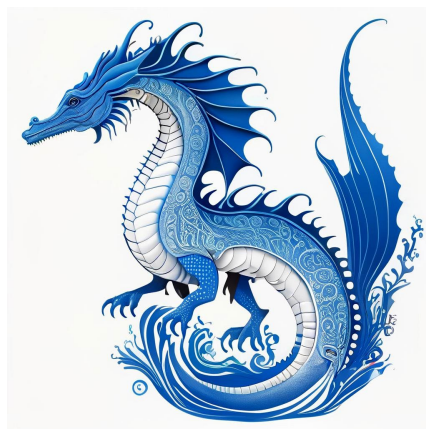

A blue and white drawing of a sea dragon.

Figure 29: High Quality Samples Produced by Meissonic.

1674  
1675  
1676  
1677  
1678  
1679  
1680  
1681  
1682  
1683  
1684  
1685  
1686  
1687  
1688  
1689  
1690  
1691  
1692  
1693  
1694  
1695  
1696  
1697  
1698  
1699  
1700  
1701  
1702  
1703  
1704  
1705  
1706  
1707  
1708  
1709  
1710  
1711  
1712  
1713  
1714  
1715  
1716  
1717  
1718  
1719  
1720  
1721  
1722  
1723  
1724  
1725  
1726  
1727

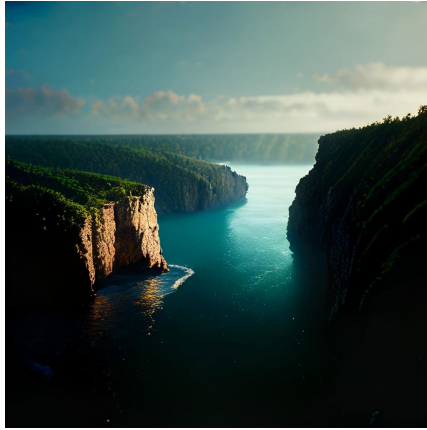

A body of water with a cliff in the background

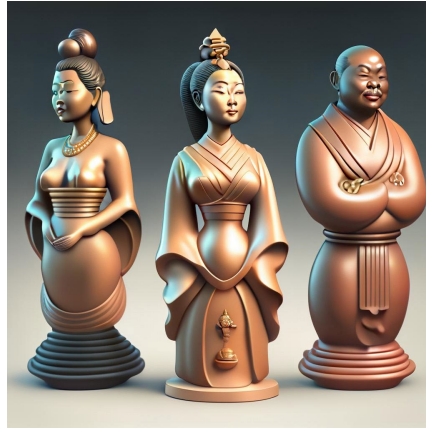

A collection of statues of Asian men and women.

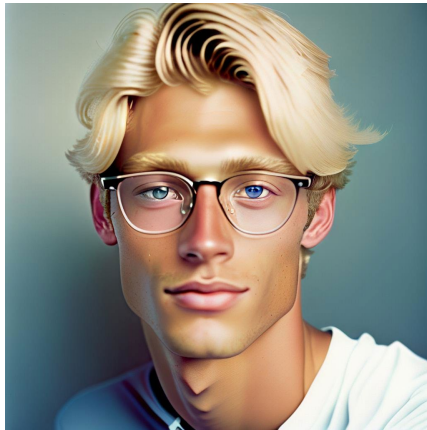

A man with blonde hair and glasses is looking at the camera.

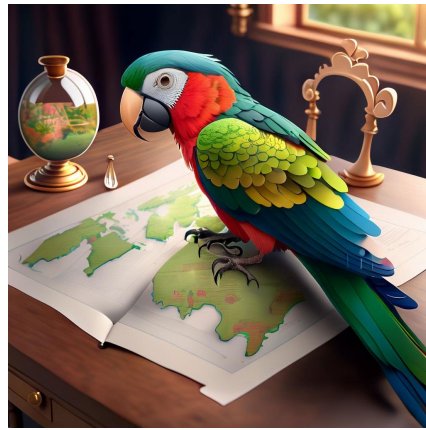

A table with a parrot on it and a map on it.

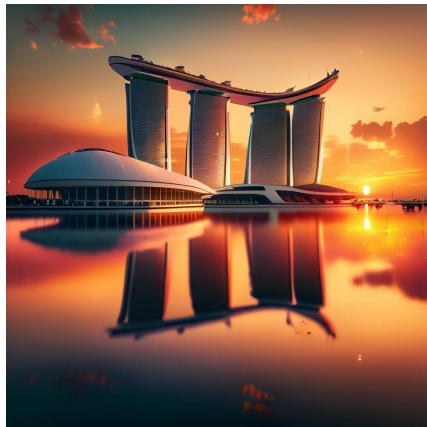

A beautiful sunset with a reflection of the Marina Bay Sands hotel.

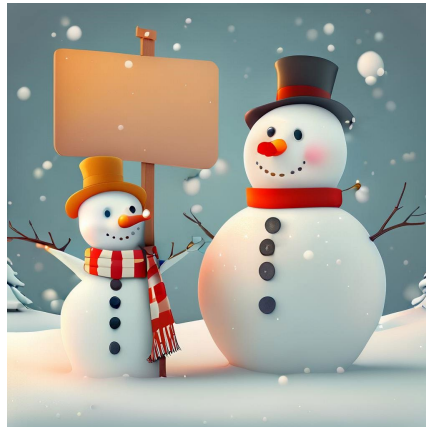

Two snowmen are standing next to a snowman with a blank sign.

Figure 30: High Quality Samples Produced by Meissonic.

1728  
1729  
1730  
1731  
1732  
1733  
1734  
1735  
1736  
1737  
1738  
1739  
1740  
1741  
1742  
1743  
1744  
1745  
1746  
1747  
1748  
1749  
1750  
1751  
1752  
1753  
1754  
1755  
1756  
1757  
1758  
1759  
1760  
1761  
1762  
1763  
1764  
1765  
1766  
1767  
1768  
1769  
1770  
1771  
1772  
1773  
1774  
1775  
1776  
1777  
1778  
1779  
1780  
1781

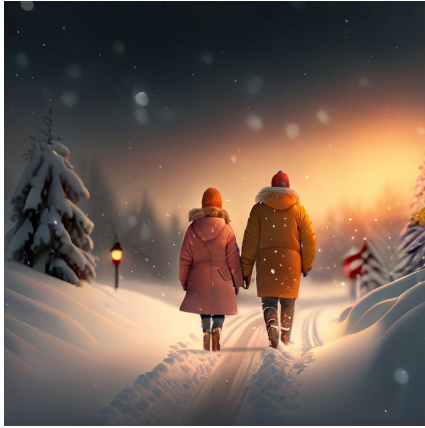

Two people walking in the snow with a sled.

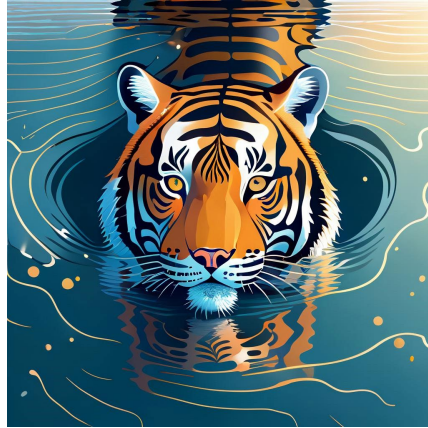

A tiger is swimming in a body of water.

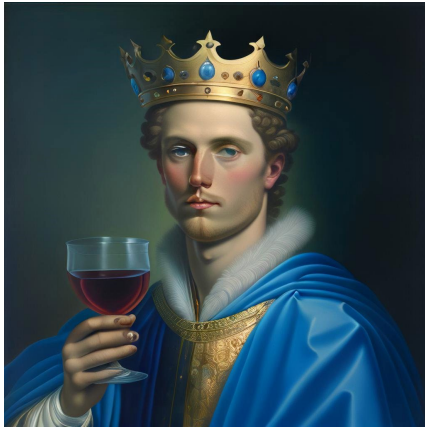

A man with a crown and a blue robe is holding a glass.

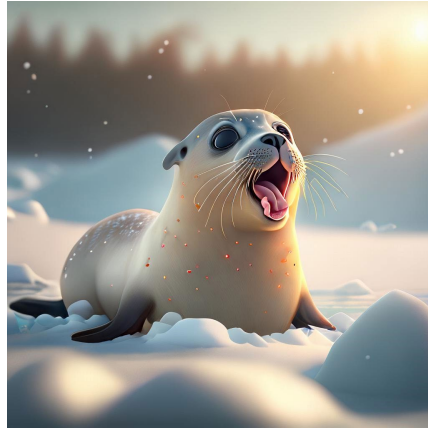

A seal is sitting in the snow with its mouth open.

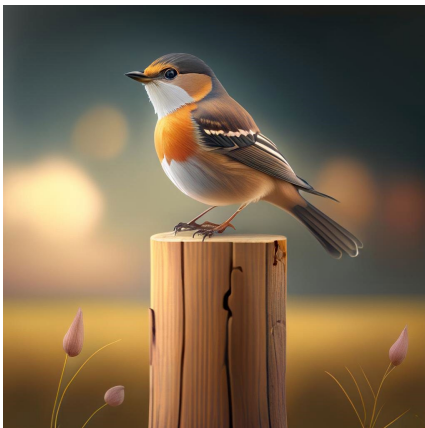

A small bird is perched on a wooden post.

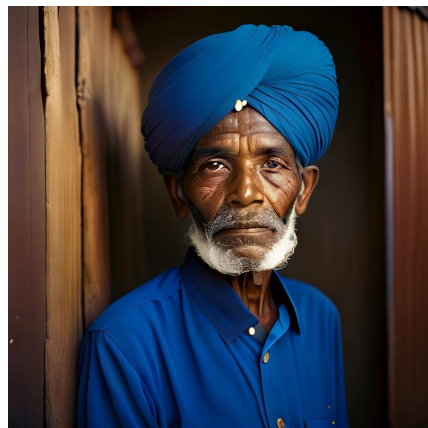

An old man with a blue turban and a blue shirt is standing in front of a wooden wall.

Figure 31: High Quality Samples Produced by Meissonic.



1782  
1783  
1784  
1785  
1786  
1787  
1788  
1789  
1790  
1791  
1792  
1793  
1794  
1795  
1796  
1797  
1798  
1799  
1800  
1801  
1802  
1803  
1804  
1805  
1806  
1807  
1808  
1809  
1810  
1811  
1812  
1813  
1814  
1815  
1816  
1817  
1818  
1819  
1820  
1821  
1822  
1823  
1824  
1825  
1826  
1827  
1828  
1829  
1830  
1831  
1832  
1833  
1834  
1835

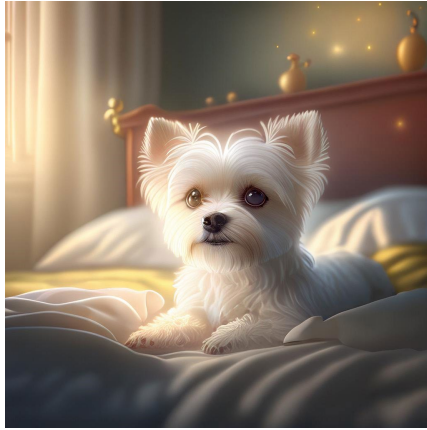

A small cute white dog is sitting on a bed.

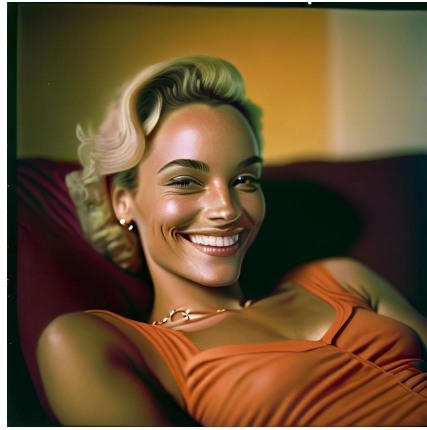

A woman is laying on a couch and smiling.

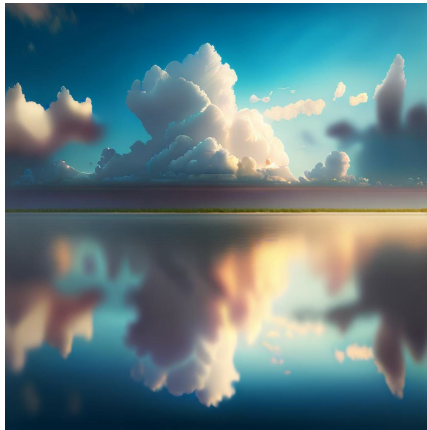

A cloudy sky over a body of water.

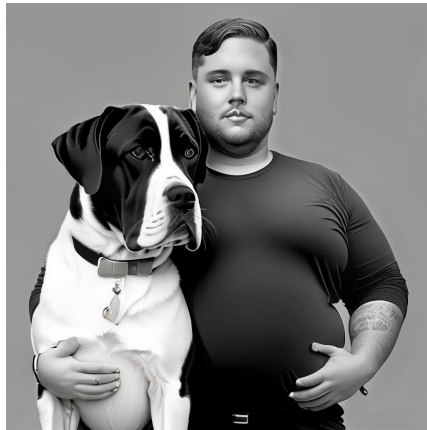

A fat man is holding a large black and white dog in a black-white figure style.

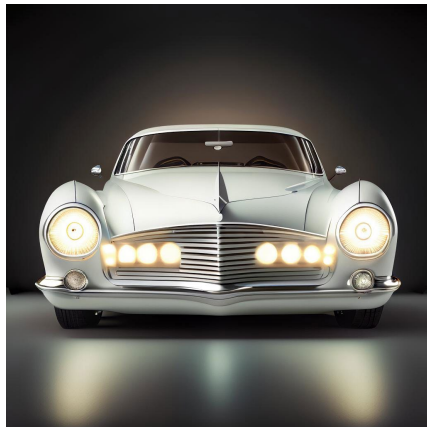

A white car with a silver rim and a headlight.

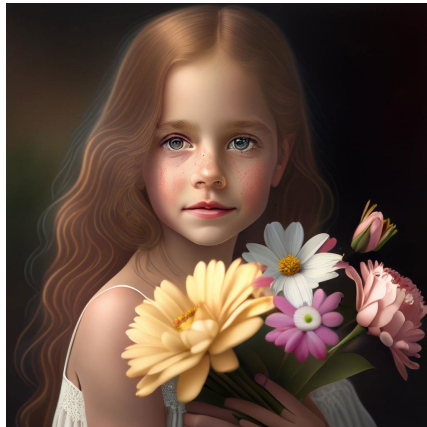

A young girl is holding a bouquet of flowers.

Figure 32: High Quality Samples Produced by Meissonic.

1836  
1837  
1838  
1839  
1840  
1841  
1842  
1843  
1844  
1845  
1846  
1847  
1848  
1849  
1850  
1851  
1852  
1853  
1854  
1855  
1856  
1857  
1858  
1859  
1860  
1861  
1862  
1863  
1864  
1865  
1866  
1867  
1868  
1869  
1870  
1871  
1872  
1873  
1874  
1875  
1876  
1877  
1878  
1879  
1880  
1881  
1882  
1883  
1884  
1885  
1886  
1887  
1888  
1889

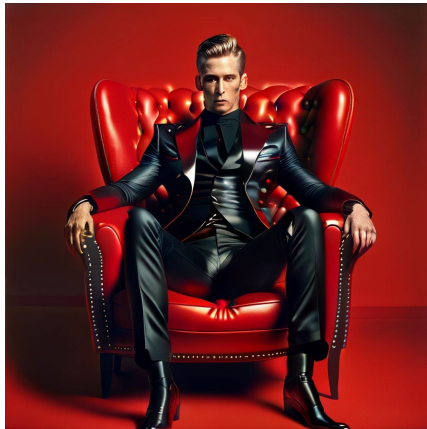

A man in a black leather suit sits in a red chair.

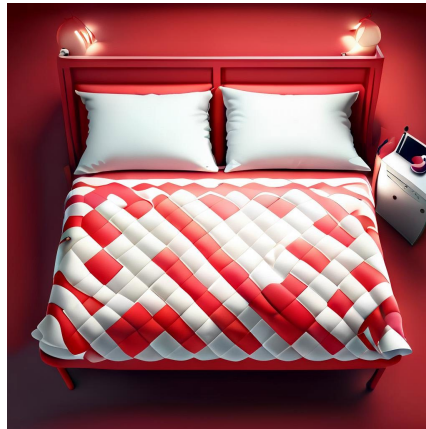

A bed with a red and white quilt on it.

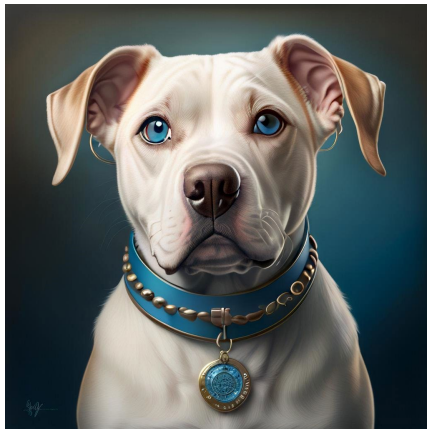

A dog with a blue collar is looking at the camera.

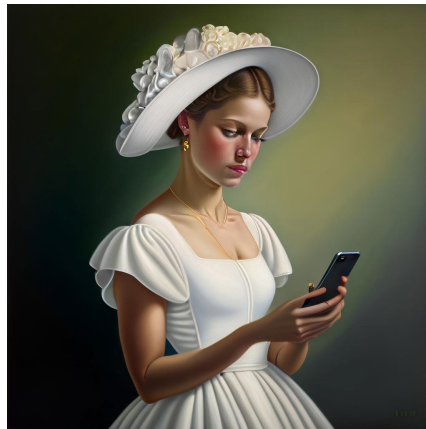

A woman in a white dress is looking at her phone.

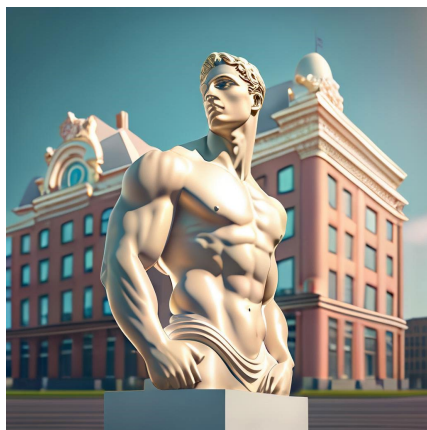

A statue of a man in front of a building.

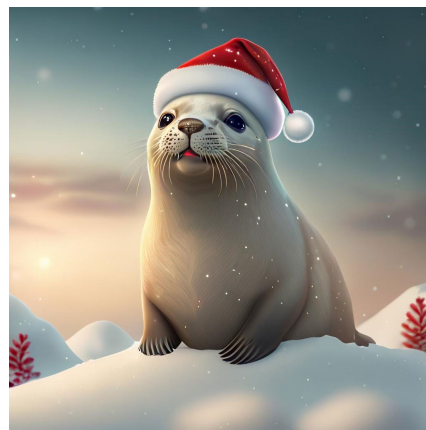

A seal is wearing a Santa hat and is on a snowy hill with the words Happy New Year written below it.

Figure 33: High Quality Samples Produced by Meissonic.

1890  
1891  
1892  
1893  
1894  
1895  
1896  
1897  
1898  
1899  
1900  
1901  
1902  
1903  
1904  
1905  
1906  
1907  
1908  
1909  
1910  
1911  
1912  
1913  
1914  
1915  
1916  
1917  
1918  
1919  
1920  
1921  
1922  
1923  
1924  
1925  
1926  
1927  
1928  
1929  
1930  
1931  
1932  
1933  
1934  
1935  
1936  
1937  
1938  
1939  
1940  
1941  
1942  
1943

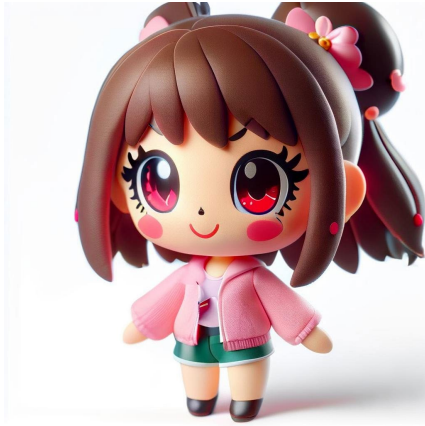

A plush toy of a girl with red eyes and a pink shirt.

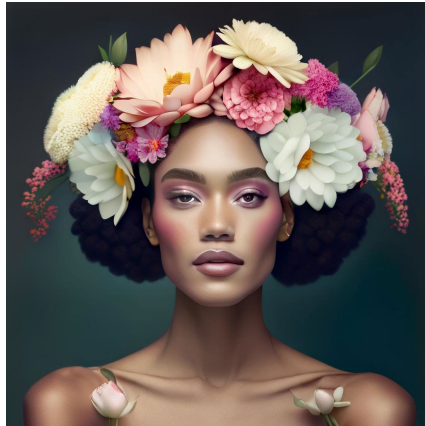

A woman with a flower crown on her head.

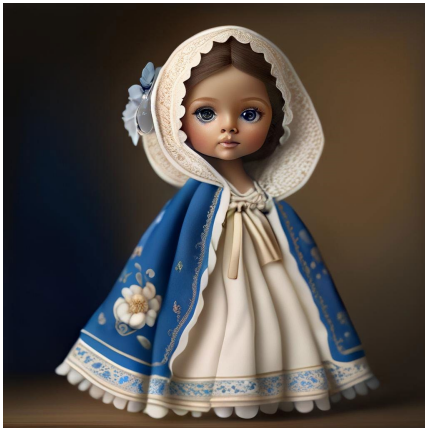

A doll wearing a blue and white dress and a tan shawl.

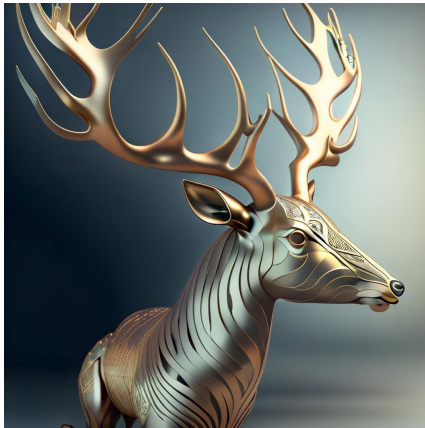

A metal sculpture of a deer with antlers.

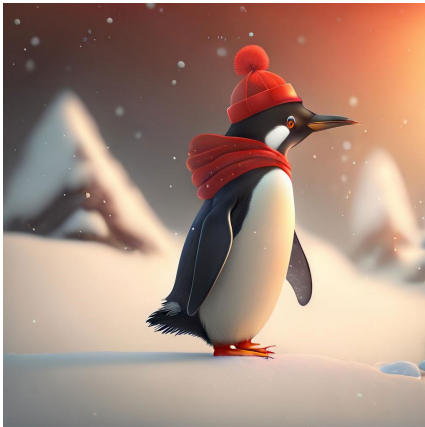

A penguin walks in the snow with a red hat on.

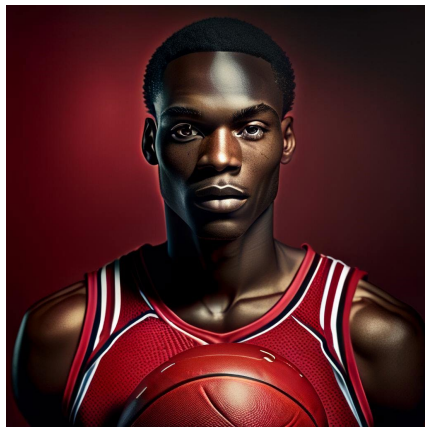

A man in a red jersey holding a basketball.

Figure 34: High Quality Samples Produced by Meissonic.



1944  
1945  
1946  
1947  
1948  
1949  
1950  
1951  
1952  
1953  
1954  
1955  
1956  
1957  
1958  
1959  
1960  
1961  
1962  
1963  
1964  
1965  
1966  
1967  
1968  
1969  
1970  
1971  
1972  
1973  
1974  
1975  
1976  
1977  
1978  
1979  
1980  
1981  
1982  
1983  
1984  
1985  
1986  
1987  
1988  
1989  
1990  
1991  
1992  
1993  
1994  
1995  
1996  
1997

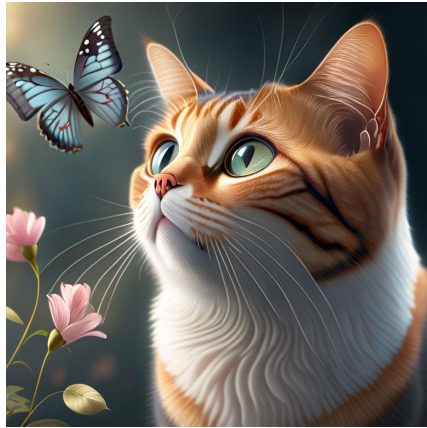

A cat is looking at a butterfly

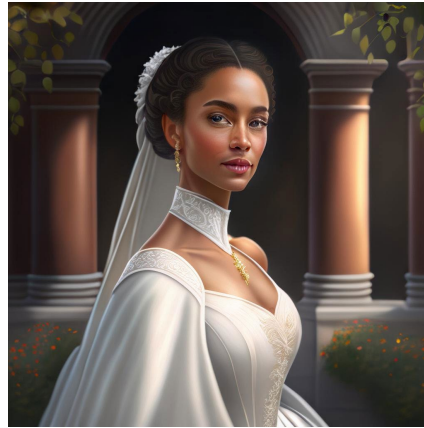

A woman in a white wedding dress stands in a courtyard.

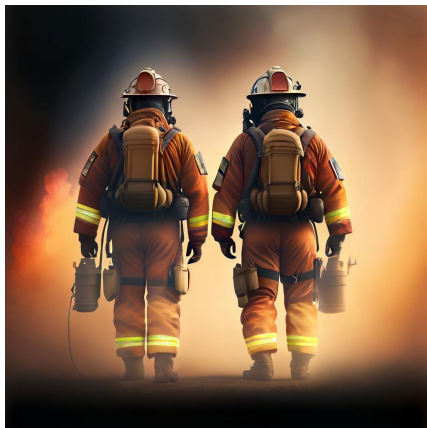

Two firefighters standing in front of a smoky background.

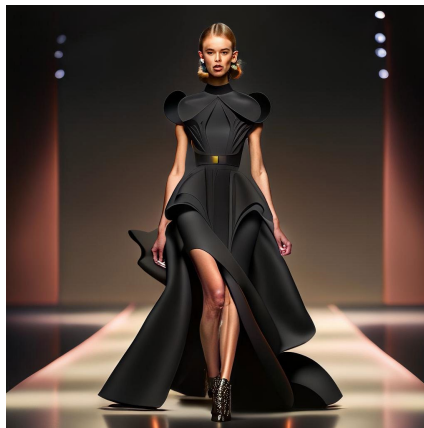

A model walks down a runway in a black dress.

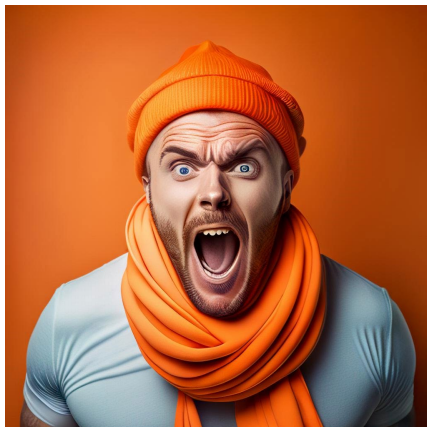

A man wearing an orange hat and scarf is screaming

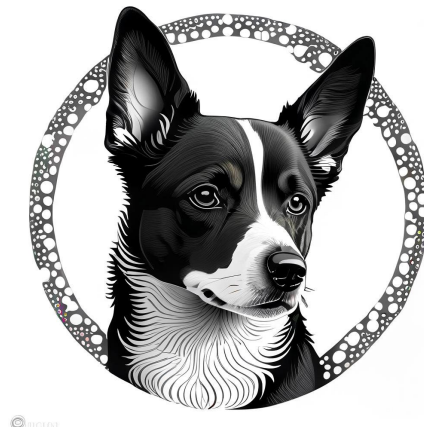

A black and white drawing of a dog's head in a circle.

Figure 35: High Quality Samples Produced by Meissonic.

1998  
1999  
2000  
2001  
2002  
2003  
2004  
2005  
2006  
2007  
2008  
2009  
2010  
2011  
2012  
2013  
2014  
2015  
2016  
2017  
2018  
2019  
2020  
2021  
2022  
2023  
2024  
2025  
2026  
2027  
2028  
2029  
2030  
2031  
2032  
2033  
2034  
2035  
2036  
2037  
2038  
2039  
2040  
2041  
2042  
2043  
2044  
2045  
2046  
2047  
2048  
2049  
2050  
2051

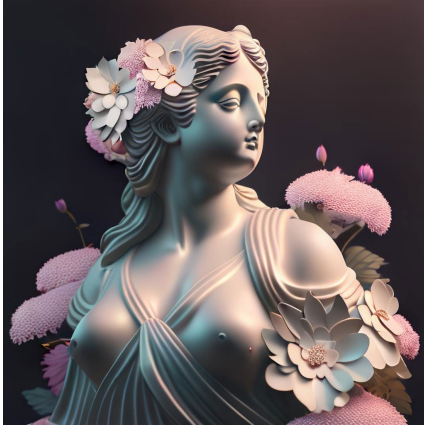

A statue of a woman surrounded by flowers

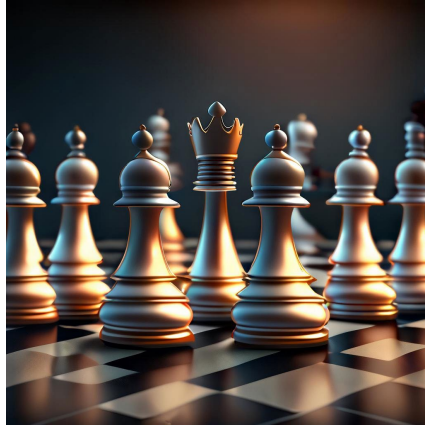

A chess board with a row of chess pieces.

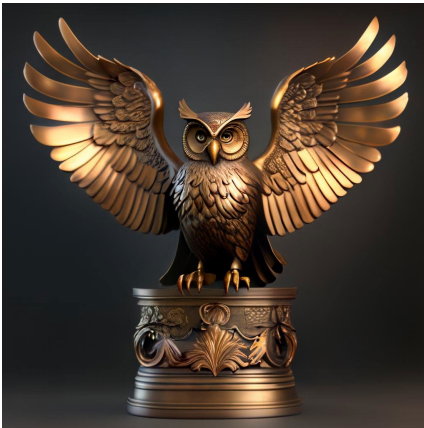

A bronze statue of an owl with its wings spread.

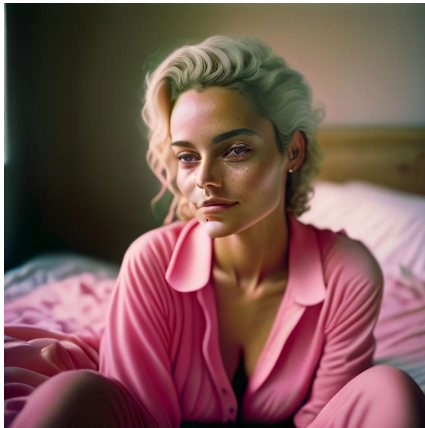

A woman in a pink shirt is sitting on a bed.

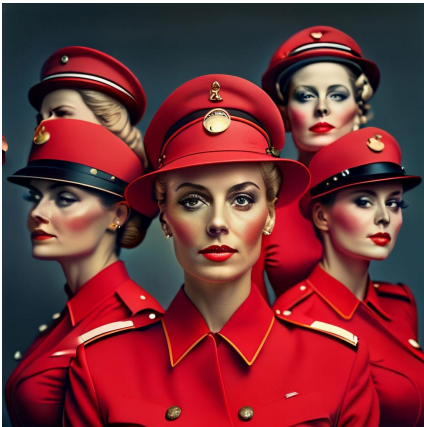

A group of women in red uniforms pose for a picture.

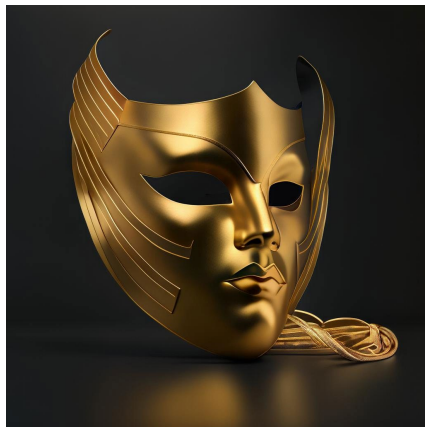

A gold mask with a gold strap is on a black surface.

Figure 36: High Quality Samples Produced by Meissonic.

2052  
2053  
2054  
2055  
2056  
2057  
2058  
2059  
2060  
2061  
2062  
2063  
2064  
2065  
2066  
2067  
2068  
2069  
2070  
2071  
2072  
2073  
2074  
2075  
2076  
2077  
2078  
2079  
2080  
2081  
2082  
2083  
2084  
2085  
2086  
2087  
2088  
2089  
2090  
2091  
2092  
2093  
2094  
2095  
2096  
2097  
2098  
2099  
2100  
2101  
2102  
2103  
2104  
2105

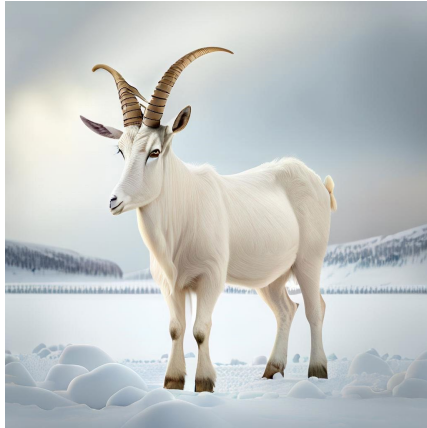

A white goat with horns is standing in the snow.

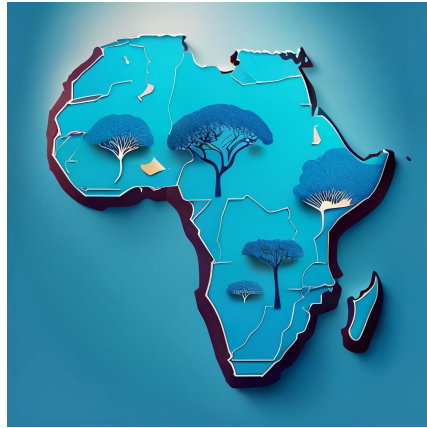

A map of Africa with a blue background.

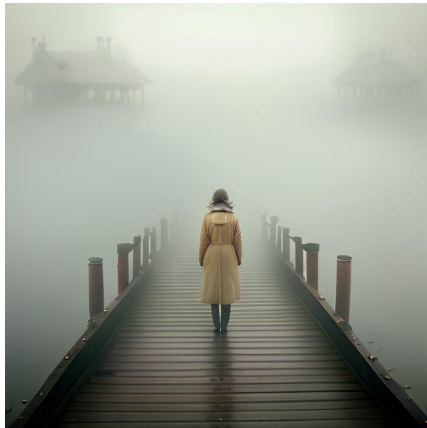

A woman stands on a dock in the fog.

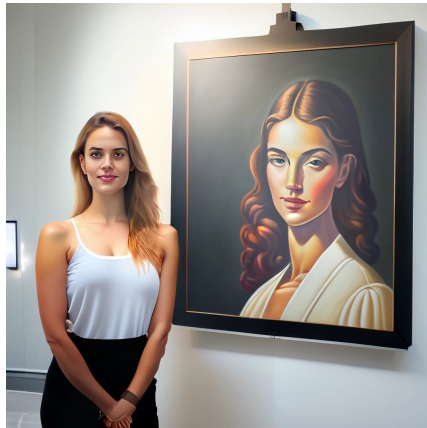

A woman is standing next to a picture of another woman.

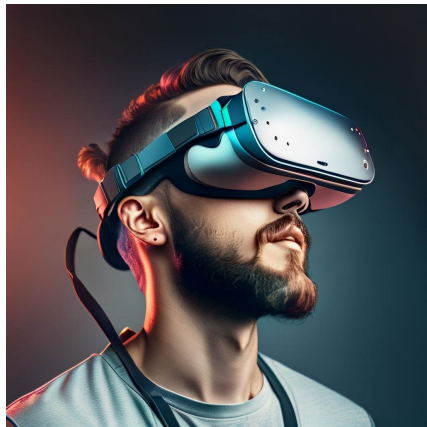

A man wearing a virtual reality headset.

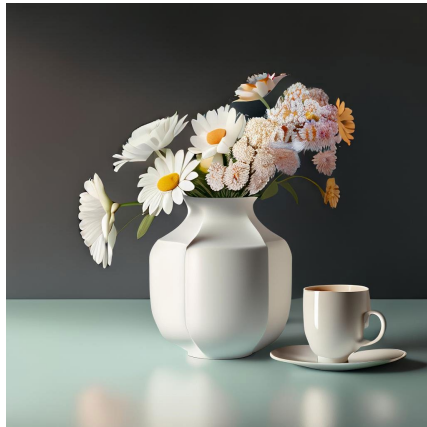

A white table with a vase of flowers and a cup of coffee on top of it.

Figure 37: High Quality Samples Produced by Meissonic.



2106  
2107  
2108  
2109  
2110  
2111  
2112  
2113  
2114  
2115  
2116  
2117  
2118  
2119  
2120  
2121  
2122  
2123  
2124  
2125  
2126  
2127  
2128  
2129  
2130  
2131  
2132  
2133  
2134  
2135  
2136  
2137  
2138  
2139  
2140  
2141  
2142  
2143  
2144  
2145  
2146  
2147  
2148  
2149  
2150  
2151  
2152  
2153  
2154  
2155  
2156  
2157  
2158  
2159

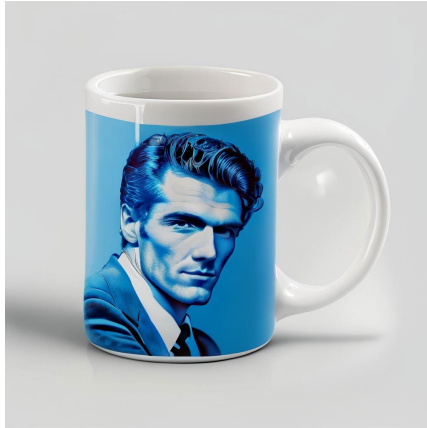

A white and blue coffee mug with a picture of a man on it.

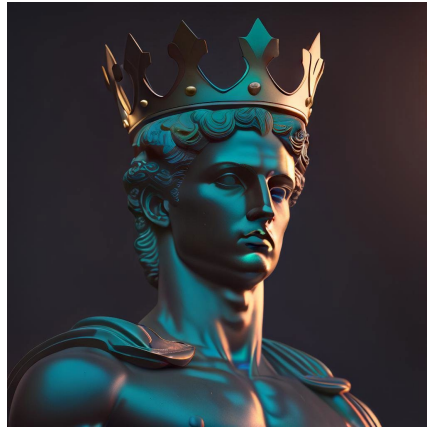

A statue of a man with a crown on his head.

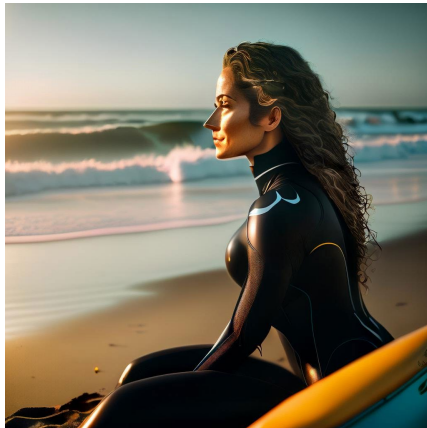

A woman in a black wetsuit sits on a bench gazing at the sea on the beach.

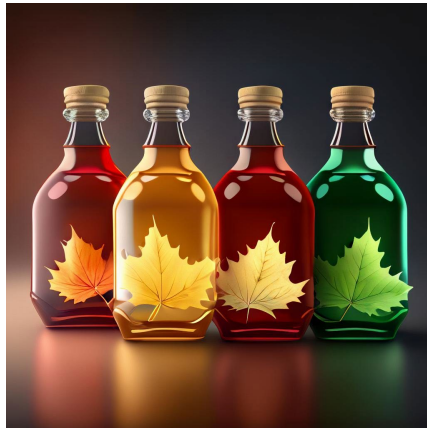

Four bottles of maple syrup in different colors.

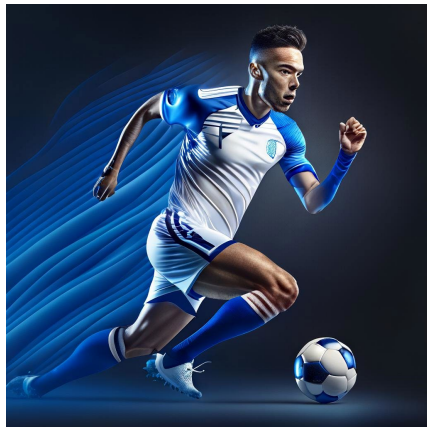

A soccer player in a blue and white uniform runs with the ball.

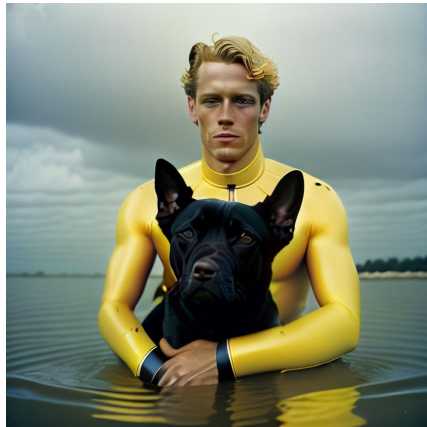

A man in a yellow wet suit is holding a big black dog in the water.

Figure 38: High Quality Samples Produced by Meissonic.

2160  
2161  
2162  
2163  
2164  
2165  
2166  
2167  
2168  
2169  
2170  
2171  
2172  
2173  
2174  
2175  
2176  
2177  
2178  
2179  
2180  
2181  
2182  
2183  
2184  
2185  
2186  
2187  
2188  
2189  
2190  
2191  
2192  
2193  
2194  
2195  
2196  
2197  
2198  
2199  
2200  
2201  
2202  
2203  
2204  
2205  
2206  
2207  
2208  
2209  
2210  
2211  
2212  
2213

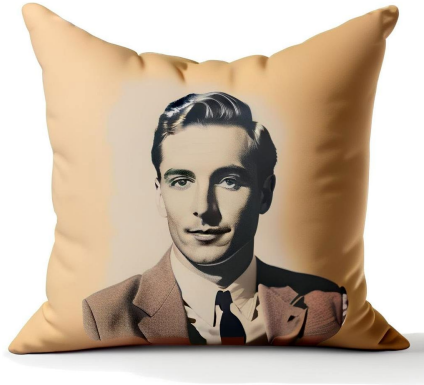

A pillow with a picture of a man on it.

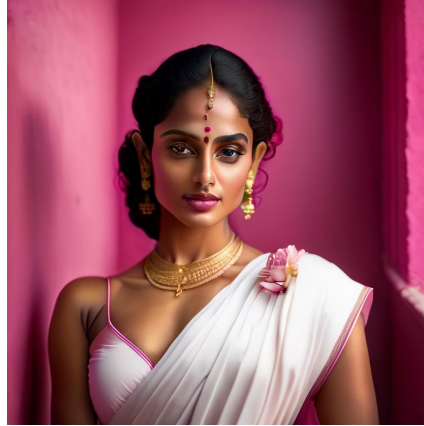

An Indian woman is wearing a white saree and standing in front of a pink wall.

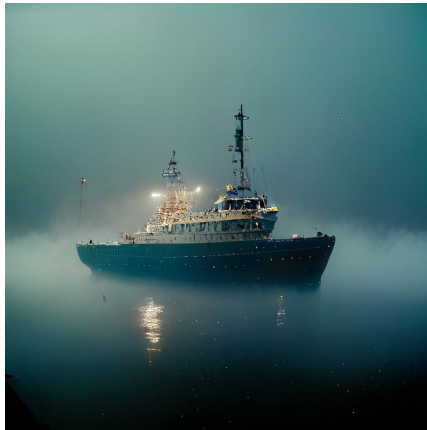

A large ship is in the water with a foggy background.

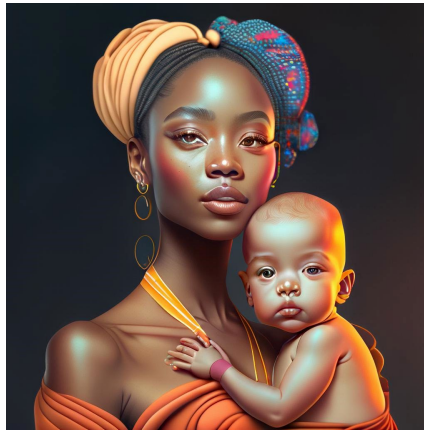

A woman holding a baby.

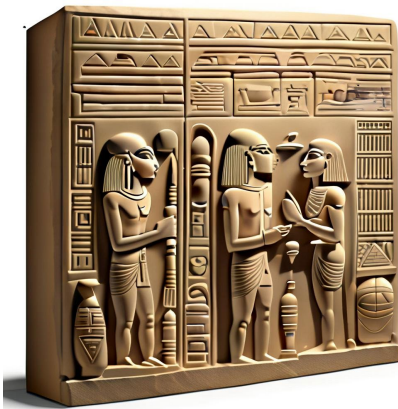

An ancient Egyptian carved stone wall with three figures and hieroglyphics.

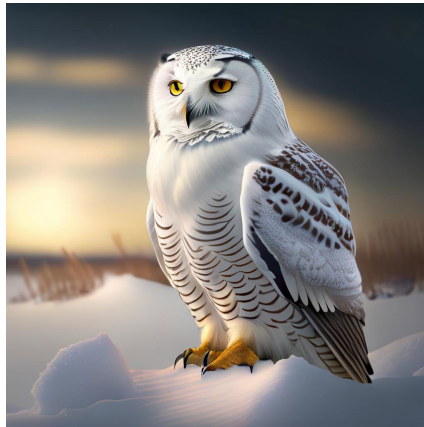

A snowy owl is sitting in the snow.

Figure 39: High Quality Samples Produced by Meissonic.

2214  
2215  
2216  
2217  
2218  
2219  
2220  
2221  
2222  
2223  
2224  
2225  
2226  
2227  
2228  
2229  
2230  
2231  
2232  
2233  
2234  
2235  
2236  
2237  
2238  
2239  
2240  
2241  
2242  
2243  
2244  
2245  
2246  
2247  
2248  
2249  
2250  
2251  
2252  
2253  
2254  
2255  
2256  
2257  
2258  
2259  
2260  
2261  
2262  
2263  
2264  
2265  
2266  
2267

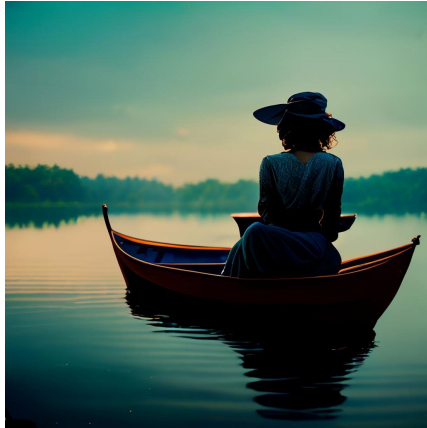

A woman is sitting on a boat and looking at a boat in the water.

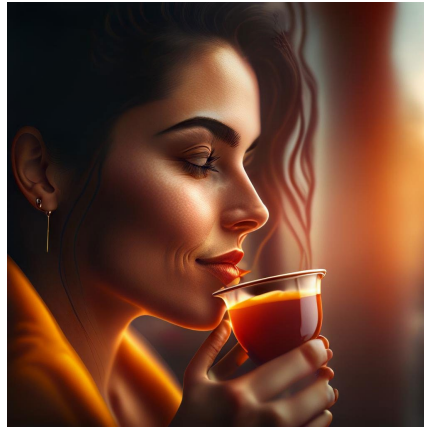

A woman drinking from a cup with a blurry background.

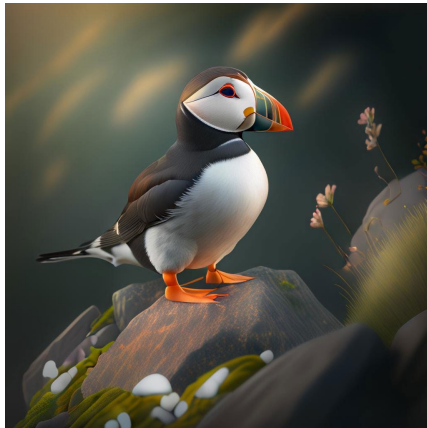

A puffin is sitting on a rock and looking off into the distance.

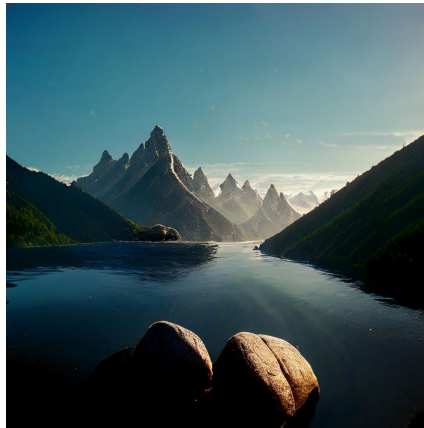

A large body of water with a rock in the middle and mountains in the background.

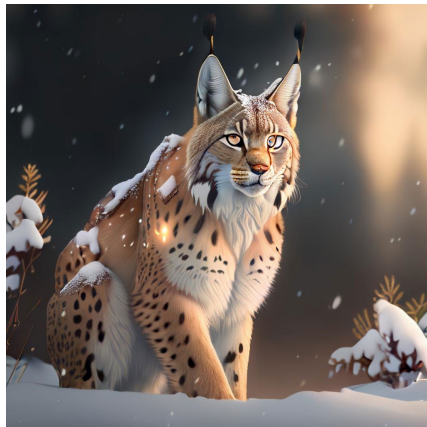

A lynx is standing in the snow.

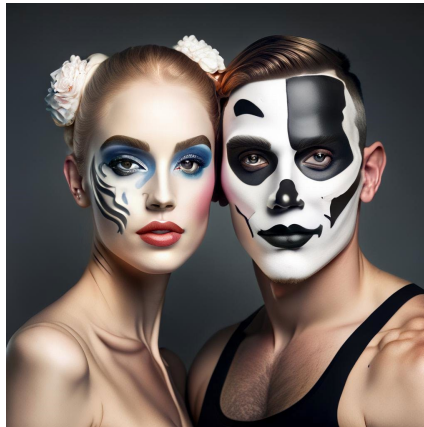

Two actors are posing for a picture with one wearing a black and white face paint.

Figure 40: High Quality Samples Produced by Meissonic.



2268  
2269  
2270  
2271  
2272  
2273  
2274  
2275  
2276  
2277  
2278  
2279  
2280  
2281  
2282  
2283  
2284  
2285  
2286  
2287  
2288  
2289  
2290  
2291  
2292  
2293  
2294  
2295  
2296  
2297  
2298  
2299  
2300  
2301  
2302  
2303  
2304  
2305  
2306  
2307  
2308  
2309  
2310  
2311  
2312  
2313  
2314  
2315  
2316  
2317  
2318  
2319  
2320  
2321

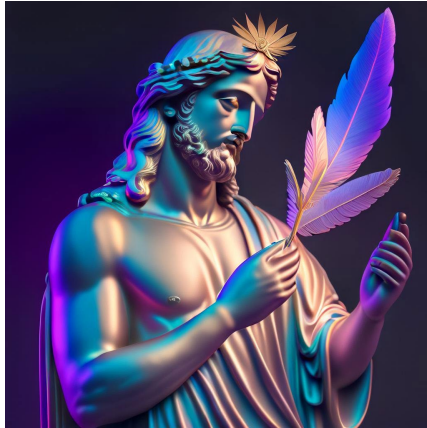

A statue of Jesus Christ is holding a feather in his hand in a purple style.

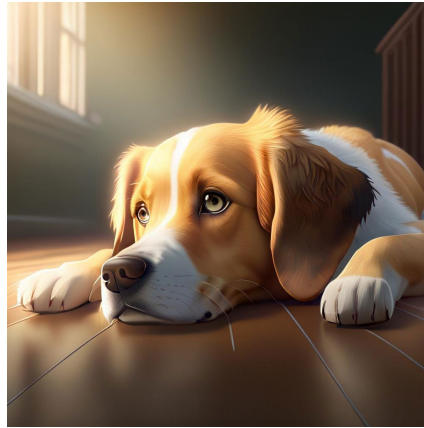

A dog is laying on the floor.

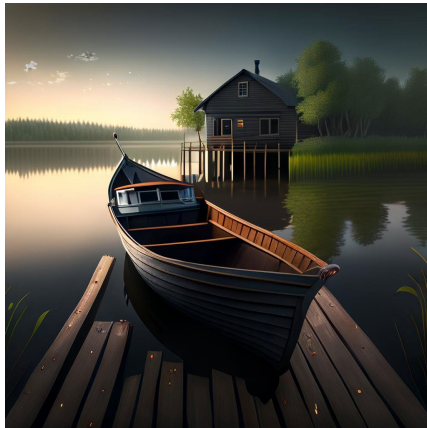

A black boat is tied to a dock on a calm lake.

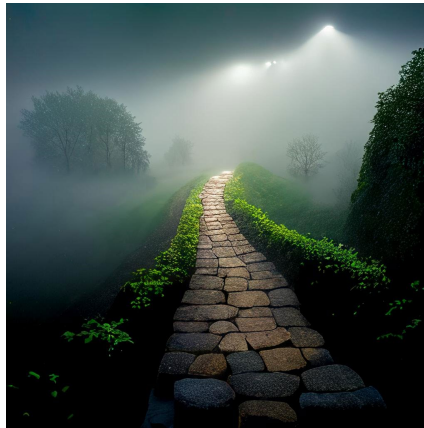

A narrow stone pathway is enveloped by lush greenery and a veil of mist.

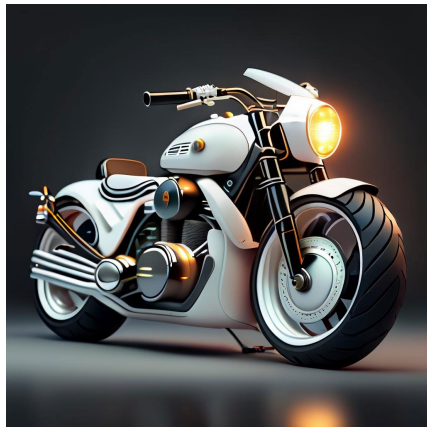

A white and black motorcycle with a headlight on it.

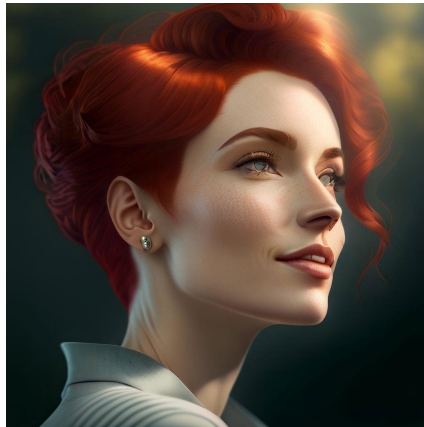

A woman with short red hair is looking off into the distance.

Figure 41: High Quality Samples Produced by Meissonic.

2322  
2323  
2324  
2325  
2326  
2327  
2328  
2329  
2330  
2331  
2332  
2333  
2334  
2335  
2336  
2337  
2338  
2339  
2340  
2341  
2342  
2343  
2344  
2345  
2346  
2347  
2348  
2349  
2350  
2351  
2352  
2353  
2354  
2355  
2356  
2357  
2358  
2359  
2360  
2361  
2362  
2363  
2364  
2365  
2366  
2367  
2368  
2369  
2370  
2371  
2372  
2373  
2374  
2375

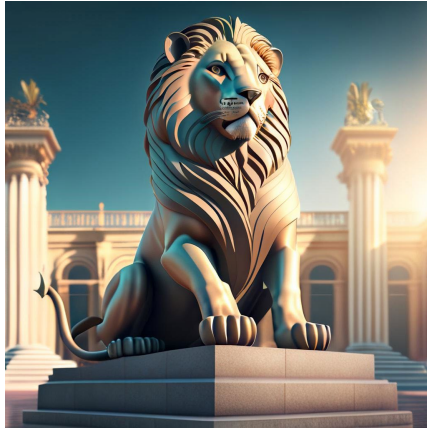

A statue of a lion stands in front of a building.

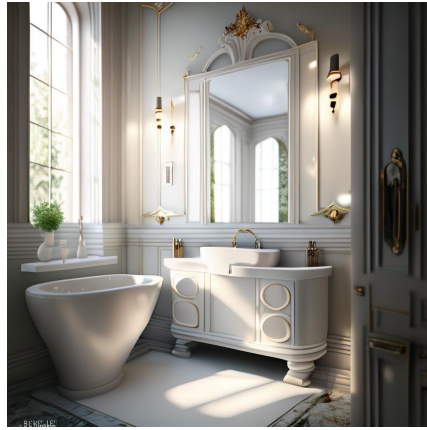

A bathroom with a modern design and a classic design.

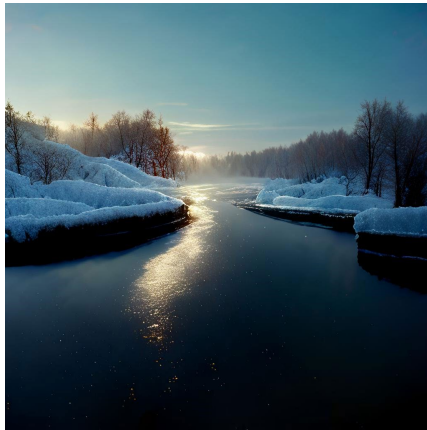

A frozen river with ice on the surface.

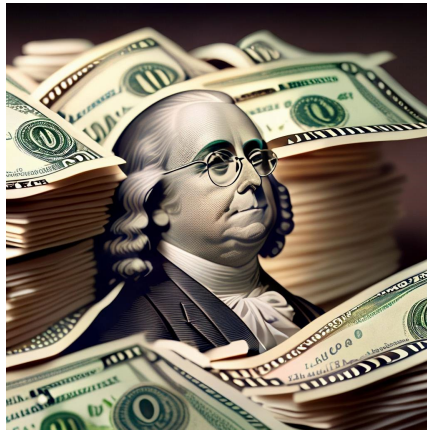

Benjamin Franklin appears among a pile of US dollars

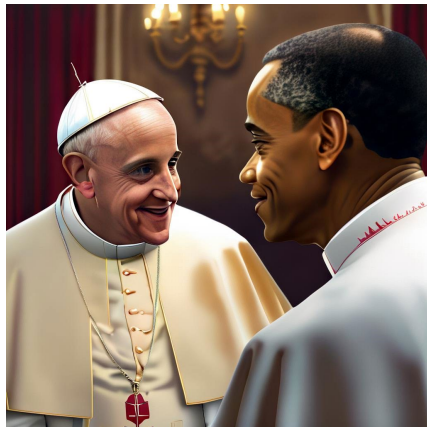

Pope Francis is talking to black priests.

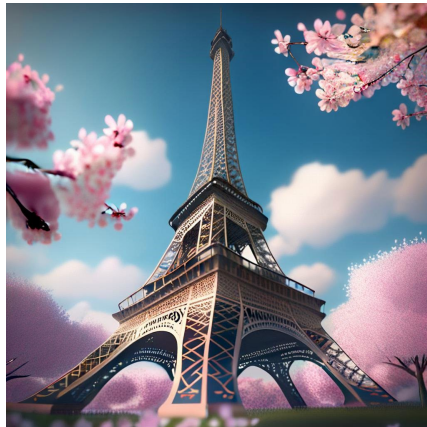

Cherry blossoms bloom under the Eiffel Tower.

Figure 42: High Quality Samples Produced by Meissonic.



2376  
2377  
2378  
2379  
2380  
2381  
2382  
2383  
2384  
2385  
2386  
2387  
2388  
2389  
2390  
2391  
2392  
2393  
2394  
2395  
2396  
2397  
2398  
2399  
2400  
2401  
2402  
2403  
2404  
2405  
2406  
2407  
2408  
2409  
2410  
2411  
2412  
2413  
2414  
2415  
2416  
2417  
2418  
2419  
2420  
2421  
2422  
2423  
2424  
2425  
2426  
2427  
2428  
2429

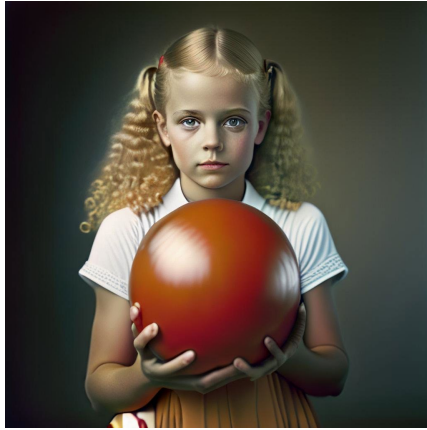

A young girl is holding a bowling ball.

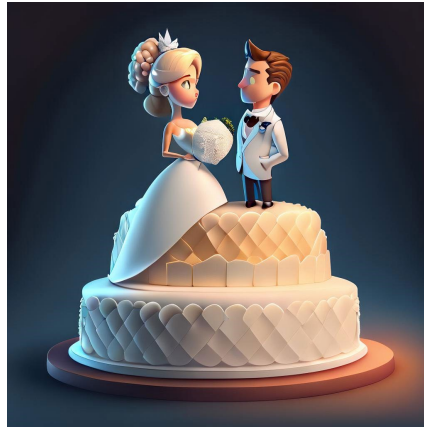

A pair of bride and groom figurines are positioned atop a white, two-tiered cake.

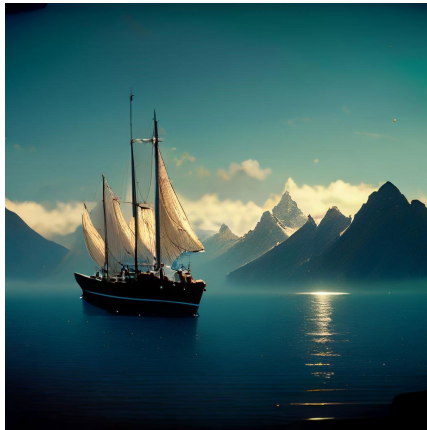

A ship is sailing in the ocean with mountains in the background.

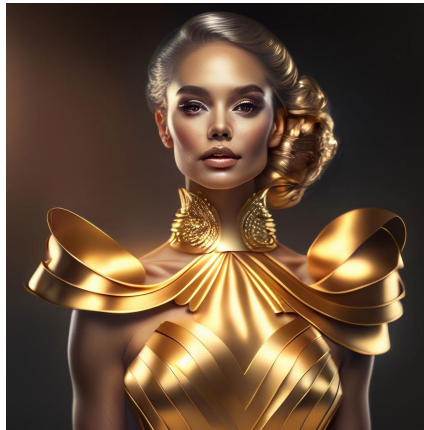

A woman in a gold dress poses for a photo.

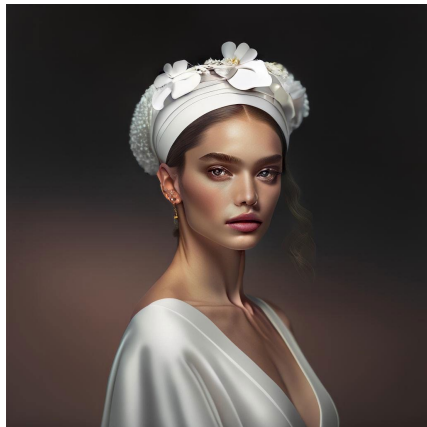

A woman wearing a headband hat and a white dress is walking down a runway.

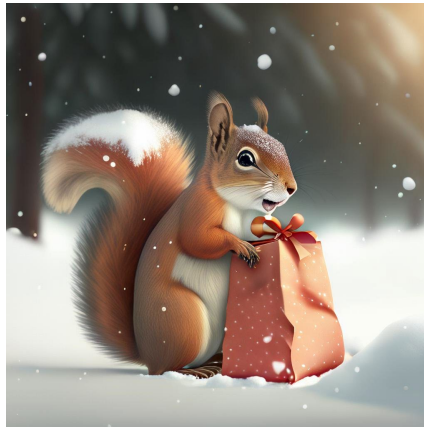

A squirrel is holding a gift bag with mouse open in the snow.

Figure 43: High Quality Samples Produced by Meissonic.



2430  
2431  
2432  
2433  
2434  
2435  
2436  
2437  
2438  
2439  
2440  
2441  
2442  
2443  
2444  
2445  
2446  
2447  
2448  
2449  
2450  
2451  
2452  
2453  
2454  
2455  
2456  
2457  
2458  
2459  
2460  
2461  
2462  
2463  
2464  
2465  
2466  
2467  
2468  
2469  
2470  
2471  
2472  
2473  
2474  
2475  
2476  
2477  
2478  
2479  
2480  
2481  
2482  
2483

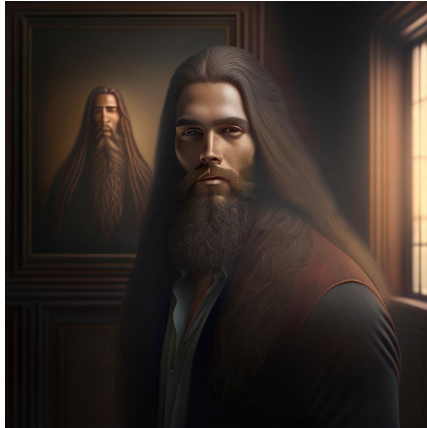

A man with long hair and a beard stands in a room, with a portrait of himself positioned behind him.

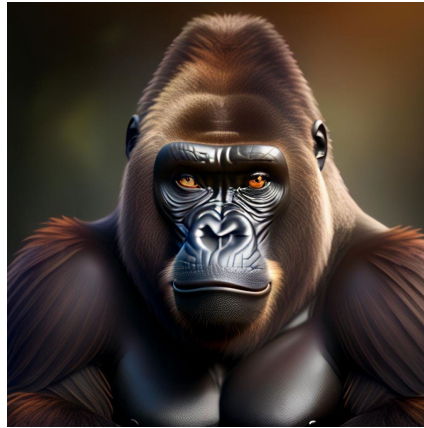

A gorilla is looking at the camera with a serious expression.

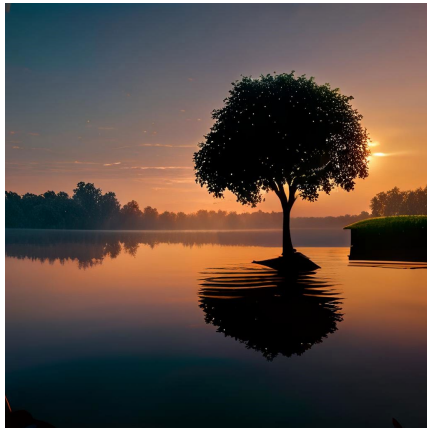

A sunset over a body of water with a tree in a small island.

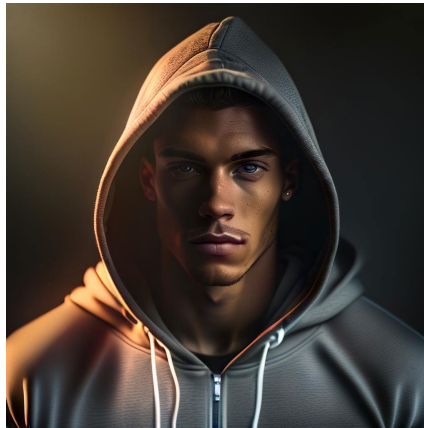

A man with a hoodie on is looking at the camera.

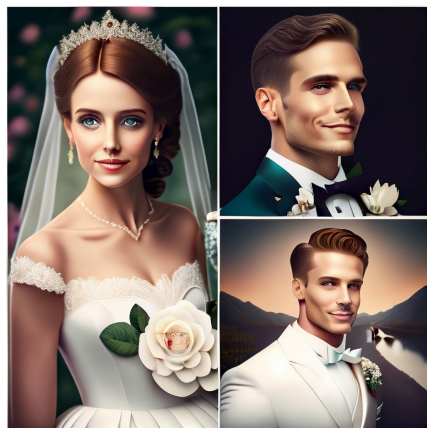

The collage consists of photos featuring the bride and groom. The bride occupies half of the collage. The groom appears in two photos, one in a white suit and the other in a black suit.

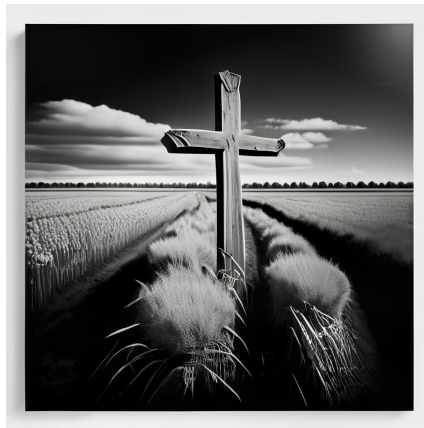

A black and white photo of a cross in a field.

Figure 44: High Quality Samples Produced by Meissonic.

2484  
2485  
2486  
2487  
2488  
2489  
2490  
2491  
2492  
2493  
2494  
2495  
2496  
2497  
2498  
2499  
2500  
2501  
2502  
2503  
2504  
2505  
2506  
2507  
2508  
2509  
2510  
2511  
2512  
2513  
2514  
2515  
2516  
2517  
2518  
2519  
2520  
2521  
2522  
2523  
2524  
2525  
2526  
2527  
2528  
2529  
2530  
2531  
2532  
2533  
2534  
2535  
2536  
2537

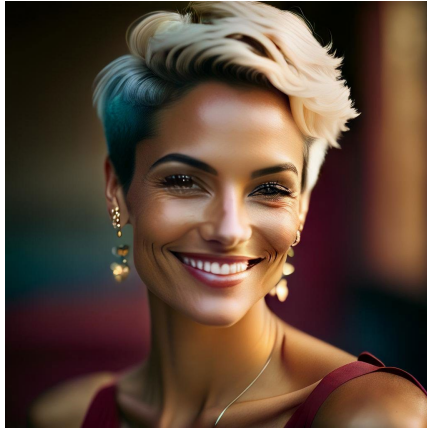

A woman with short hair and earrings is smiling.

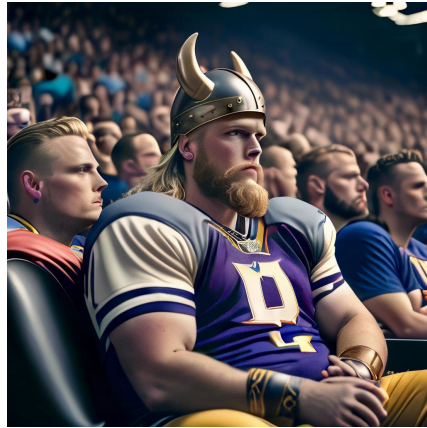

A man dressed in Viking attire is seated among the crowd.

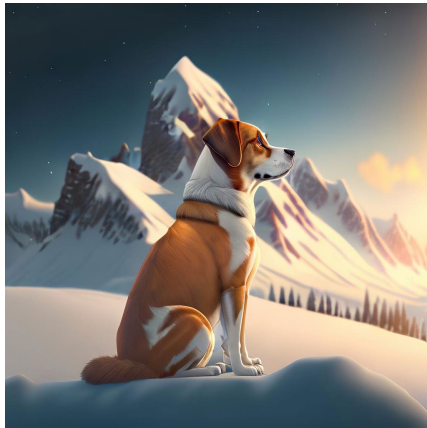

A dog is sitting in the snow in front of a mountain.

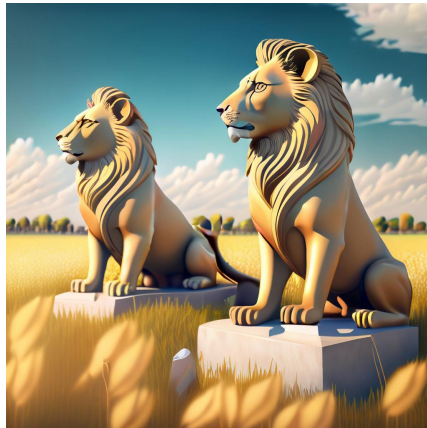

Two golden statues of lions standing in a field.

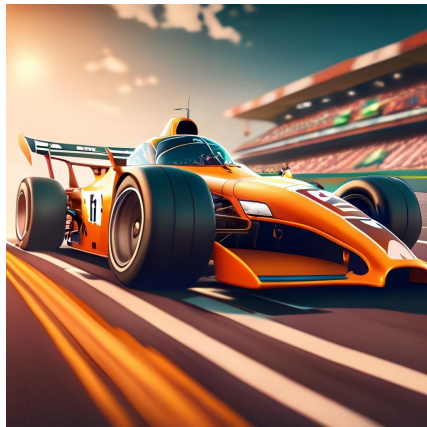

A race car is driving on a track.

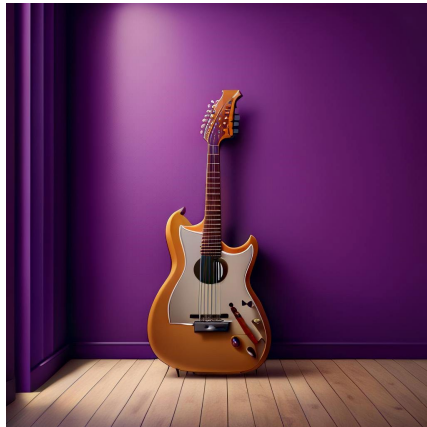

A guitar is sitting on a wooden floor in front of a purple wall.

Figure 45: High Quality Samples Produced by Meissonic.



2538  
2539  
2540  
2541  
2542  
2543  
2544  
2545  
2546  
2547  
2548  
2549  
2550  
2551  
2552  
2553  
2554  
2555  
2556  
2557  
2558  
2559  
2560  
2561  
2562  
2563  
2564  
2565  
2566  
2567  
2568  
2569  
2570  
2571  
2572  
2573  
2574  
2575  
2576  
2577  
2578  
2579  
2580  
2581  
2582  
2583  
2584  
2585  
2586  
2587  
2588  
2589  
2590  
2591

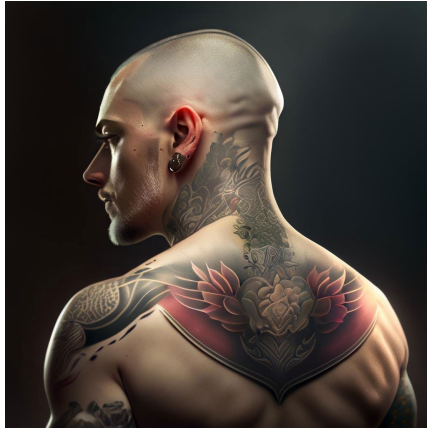

A man with a shaved head and a tattoo on his back.

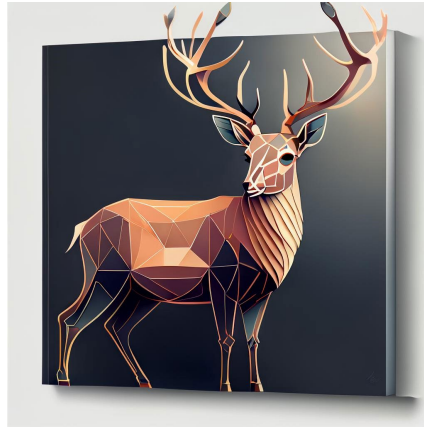

A deer is drawn in a geometric style.

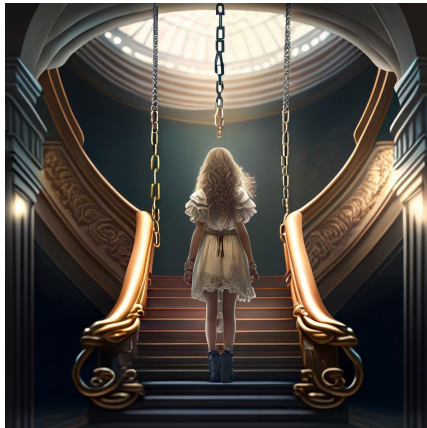

A woman is standing on a staircase, back to the camera with three chains hanging from the ceiling.

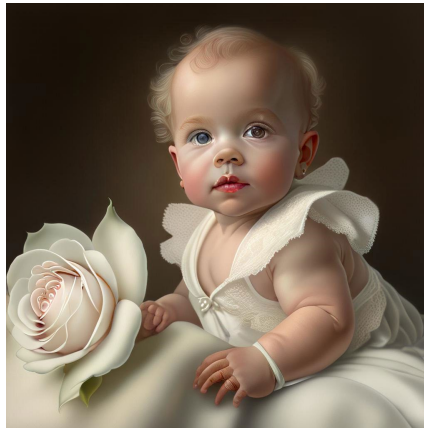

A baby is sitting on a white blanket holding a white rose.

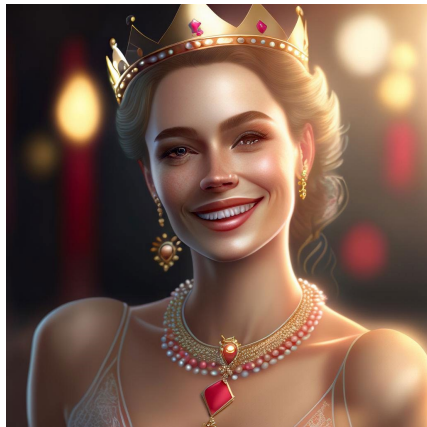

A woman wearing a crown and a necklace is smiling.

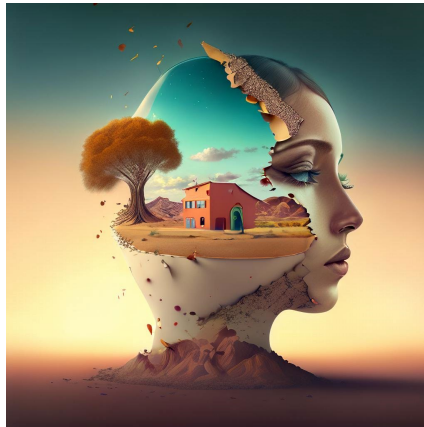

A surreal mental landscape, in which elements of nature and a house emerge from the back of a woman's head.

Figure 46: High Quality Samples Produced by Meissonic.



2592  
2593  
2594  
2595  
2596  
2597  
2598  
2599  
2600  
2601  
2602  
2603  
2604  
2605  
2606  
2607  
2608  
2609  
2610  
2611  
2612  
2613  
2614  
2615  
2616  
2617  
2618  
2619  
2620  
2621  
2622  
2623  
2624  
2625  
2626  
2627  
2628  
2629  
2630  
2631  
2632  
2633  
2634  
2635  
2636  
2637  
2638  
2639  
2640  
2641  
2642  
2643  
2644  
2645

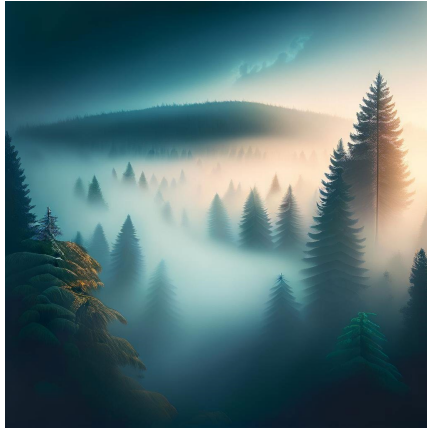

A forest with trees and fog.

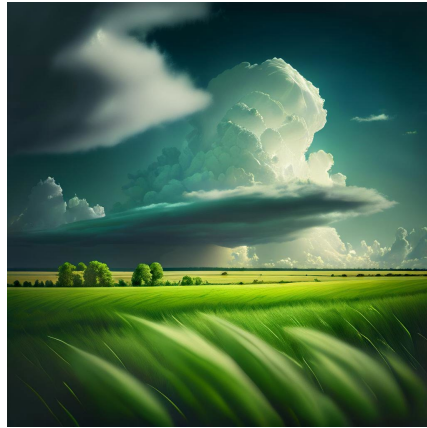

A cloudy sky over a green field.

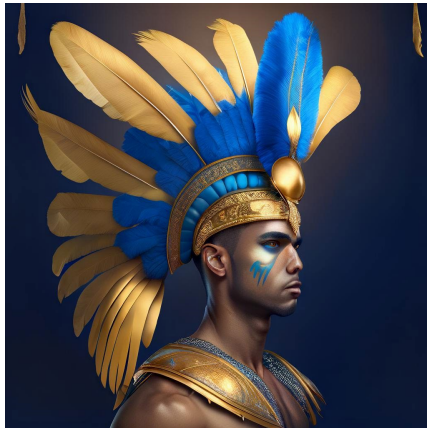

A man wearing a large blue and gold feathered headdress.

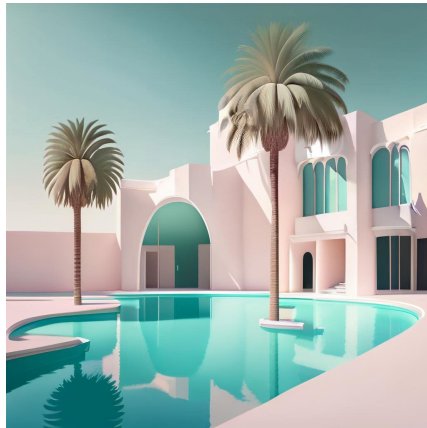

An image depicting a minimalist design featuring a pool situated in front of a white building with palm

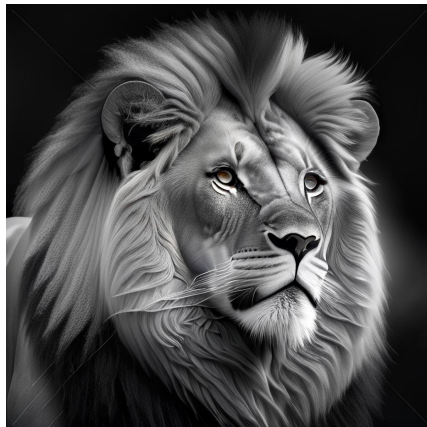

A lion's head is shown in a grayscale image.

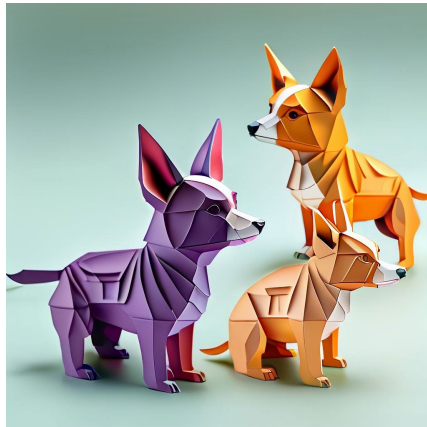

Three origami dogs, one of which is purple, while the others are yellow.

Figure 47: High Quality Samples Produced by Meissonic.

2646  
2647  
2648  
2649  
2650  
2651  
2652  
2653  
2654  
2655  
2656  
2657  
2658  
2659  
2660  
2661  
2662  
2663  
2664  
2665  
2666  
2667  
2668  
2669  
2670  
2671  
2672  
2673  
2674  
2675  
2676  
2677  
2678  
2679  
2680  
2681  
2682  
2683  
2684  
2685  
2686  
2687  
2688  
2689  
2690  
2691  
2692  
2693  
2694  
2695  
2696  
2697  
2698  
2699

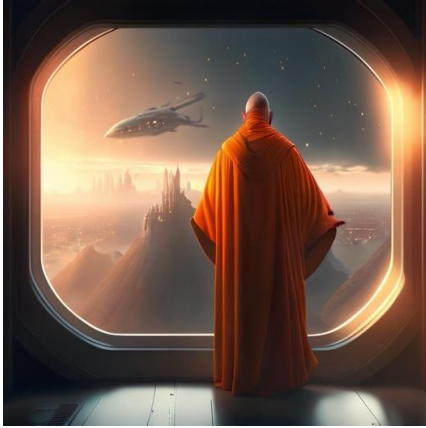

A blind monk wearing an orange robe stares out the window of a spaceship in a dramatic lighting as depicted in a matte painting.

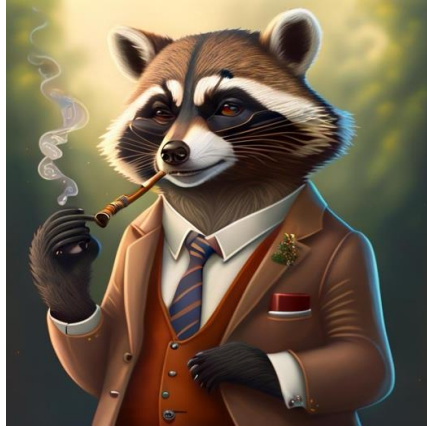

A racoon wearing a suit smoking a cigar in the style of James Gurney.

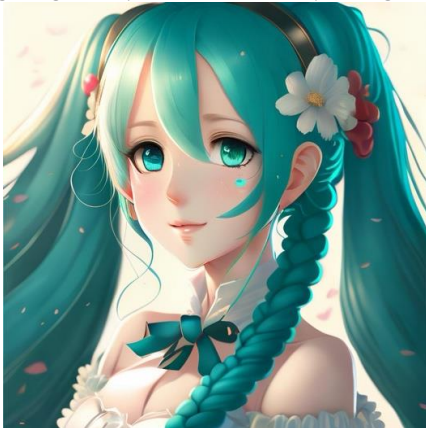

Classical romantic painting of Hatsune Miku with blue hair.

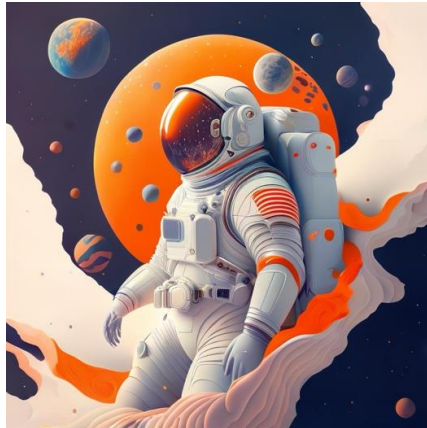

An astronaut floats amidst planets against a cosmic backdrop in a highly detailed, refreshing digital painting by James Jean.

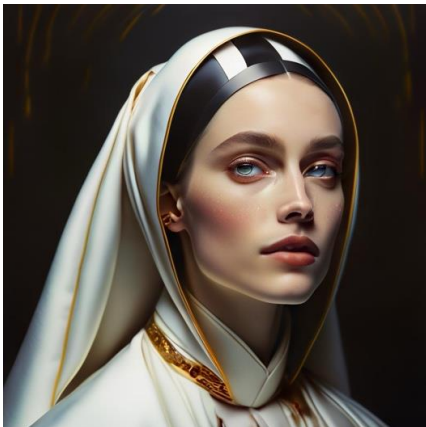

Close-up hyperrealistic oil painting portrait of a nun fashion model looking up against a black background, with classicism and 80s sci-fi Japanese book art influences.

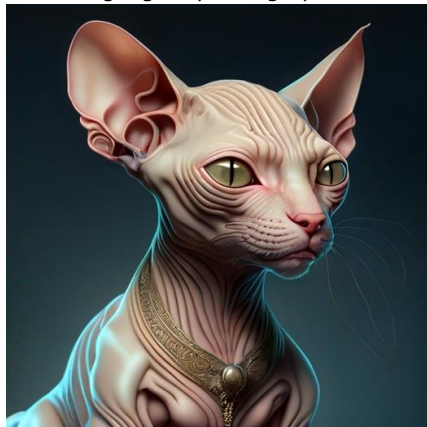

A digital painting of a hairless, inside-out cat with intricate details and a horror theme.

Figure 48: High Quality Samples Produced by Meissonic.



2700  
2701  
2702  
2703  
2704  
2705  
2706  
2707  
2708  
2709  
2710  
2711  
2712  
2713  
2714  
2715  
2716  
2717  
2718  
2719  
2720  
2721  
2722  
2723  
2724  
2725  
2726  
2727  
2728  
2729  
2730  
2731  
2732  
2733  
2734  
2735  
2736  
2737  
2738  
2739  
2740  
2741  
2742  
2743  
2744  
2745  
2746  
2747  
2748  
2749  
2750  
2751  
2752  
2753

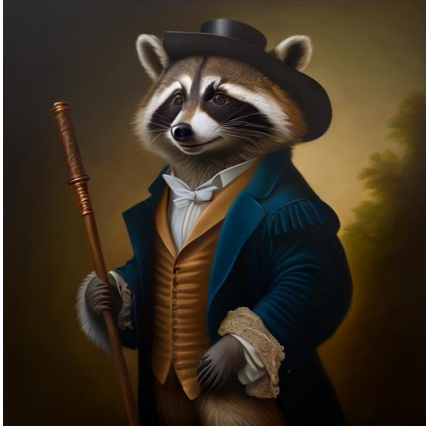

A raccoon in formal attire, carrying a bag and cane, depicted in a Rembrandt-style oil painting.

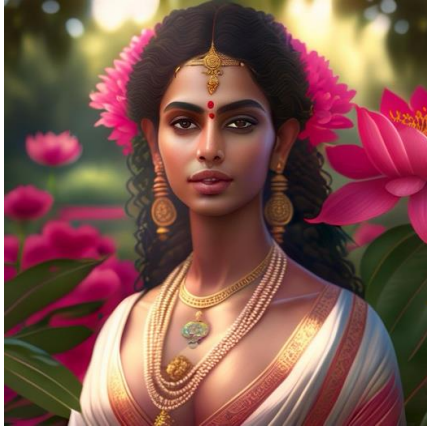

A cinematic fashion portrait of a Hindu goddess standing in a beautiful garden.

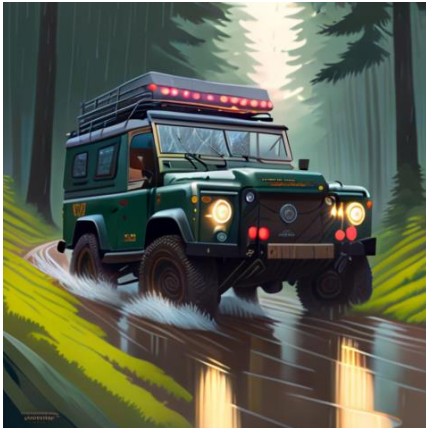

A Landrover crosses a forest path in the rain in a highly-detailed digital painting by artists Greg Rutkowski and Artgerm.

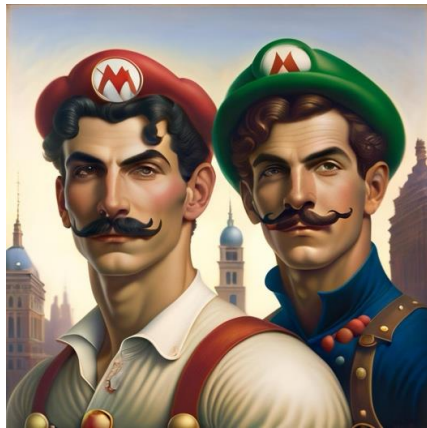

A portrait of Mario and Luigi from Mario Bros with a detailed face and a city background, painted by Bouguereau.

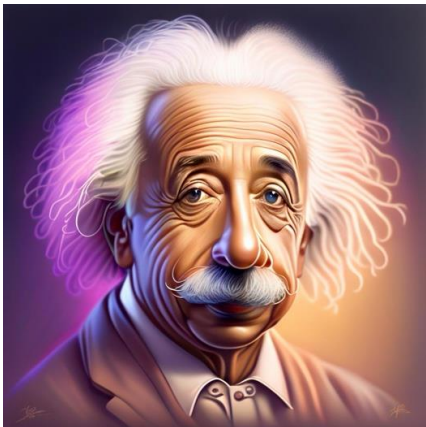

Image of Albert Einstein created by Park Jun Seong.

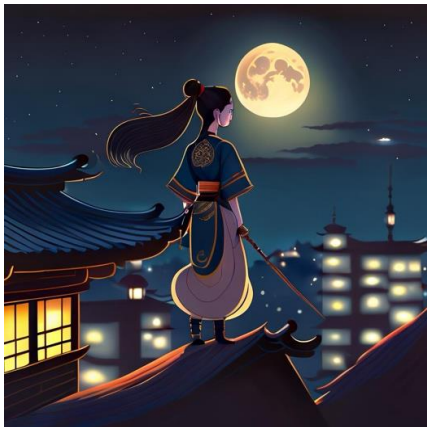

A painting depicting a wuxia character standing on a roof under a moonlit night.

Figure 49: High Quality Samples Produced by Meissonic.



2754  
2755  
2756  
2757  
2758  
2759  
2760  
2761  
2762  
2763  
2764  
2765  
2766  
2767  
2768  
2769  
2770  
2771  
2772  
2773  
2774  
2775  
2776  
2777  
2778  
2779  
2780  
2781  
2782  
2783  
2784  
2785  
2786  
2787  
2788  
2789  
2790  
2791  
2792  
2793  
2794  
2795  
2796  
2797  
2798  
2799  
2800  
2801  
2802  
2803  
2804  
2805  
2806  
2807

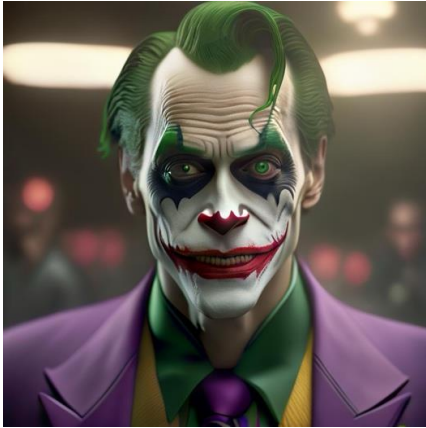

Steve Buscemi portrays the Joker.

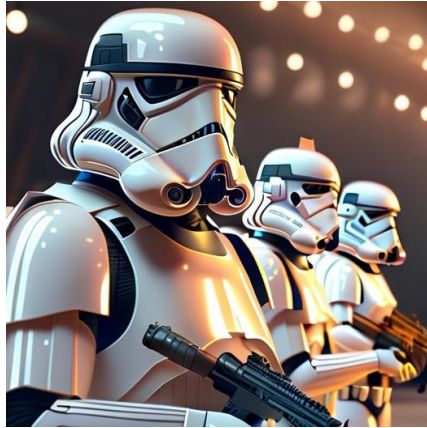

The image depicts stormtroopers in a hyper realistic style, with intricate and hyper detailed design, characterized by ambient and volumetric lighting, reminiscent of Star Wars concept art by George Lucas and Ralph McQuarrie, with a style similar to GTA V.

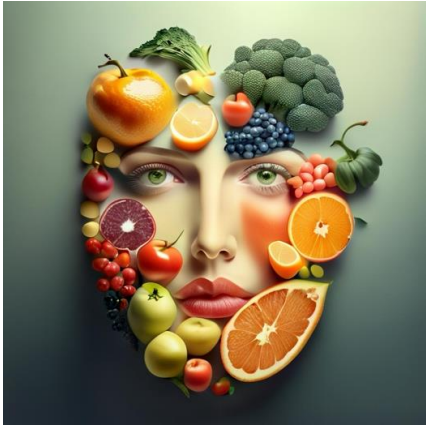

Image depicting a person's face composed entirely of fruits and vegetables.

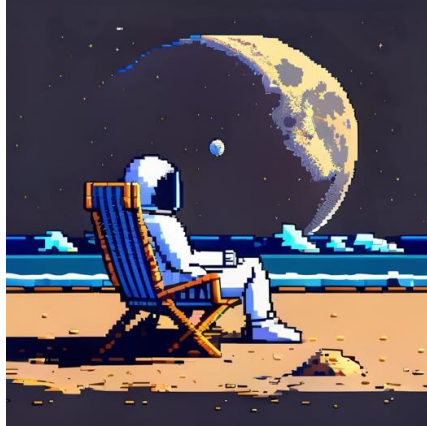

A space man sat on a beach chair on the moon, pixel art.

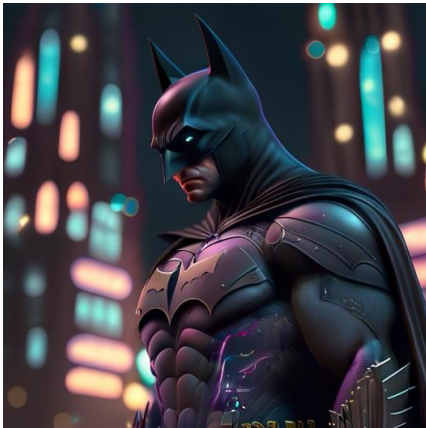

A cyberpunk-style Batman in a dark city, depicted in an extremely detailed piece of artwork by Chris Labrooy.

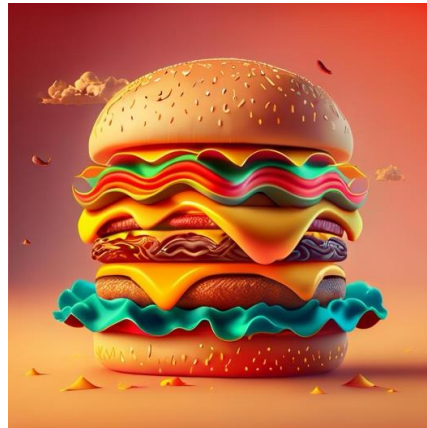

The image is a trippy cheeseburger with warm colors, depicted in highly detailed illustration and rendered in octane, created by the award winning studio 4.

Figure 50: High Quality Samples Produced by Meissonic.

2808  
2809  
2810  
2811  
2812  
2813  
2814  
2815  
2816  
2817  
2818  
2819  
2820  
2821  
2822  
2823  
2824  
2825  
2826  
2827  
2828  
2829  
2830  
2831  
2832  
2833  
2834  
2835  
2836  
2837  
2838  
2839  
2840  
2841  
2842  
2843  
2844  
2845  
2846  
2847  
2848  
2849  
2850  
2851  
2852  
2853  
2854  
2855  
2856  
2857  
2858  
2859  
2860  
2861

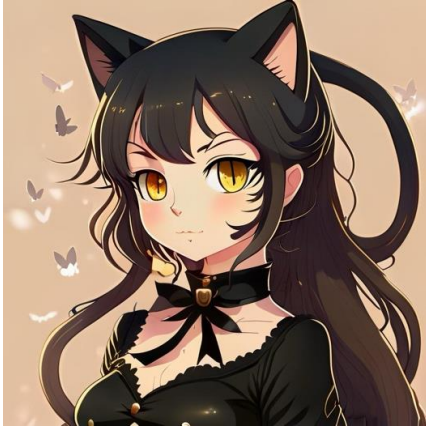

A Salem black cat girl in anime style with a simple background.

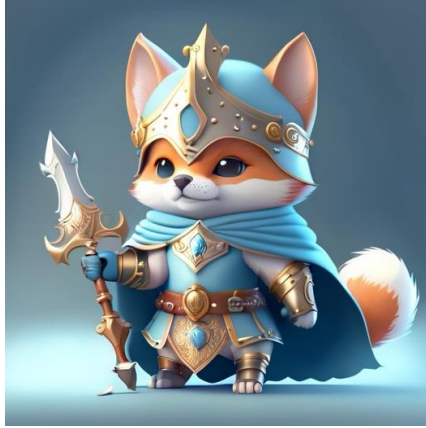

A cute anthropomorphic fox knight wearing a cape and crown in pale blue armor.

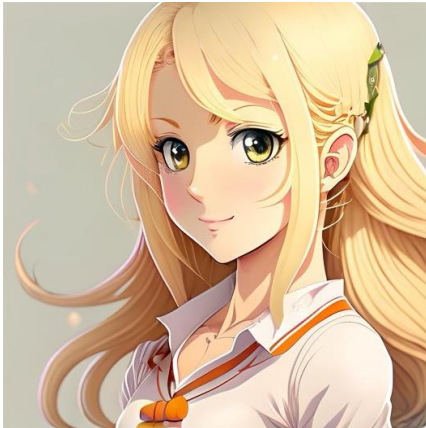

Blond-haired girl depicted in anime style.

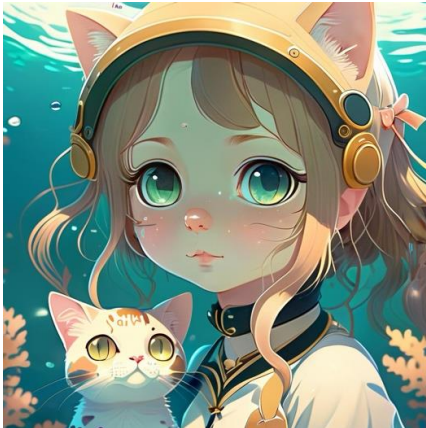

A cute anime-style female cat girl with large eyes is pictured underwater with a simple background.

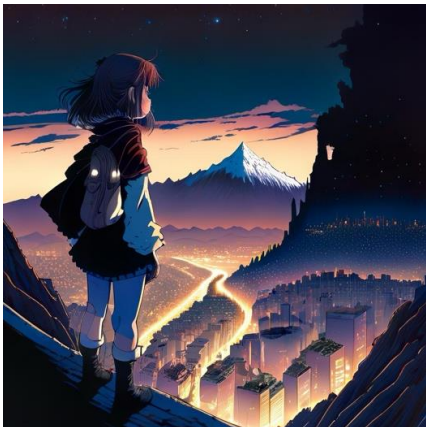

A girl peers over the edge of a mountain at a giant city in the dark of night, depicted in a manga illustration by Kentaro Miura and Hiromu Arakawa.

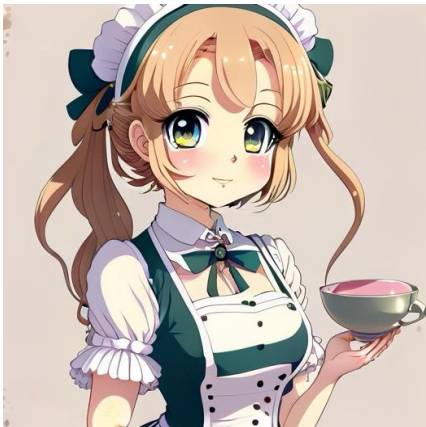

Illustration of an anime maid with a pretty face and eyes, shown in a full-body upper shot.

Figure 51: High Quality Samples Produced by Meissonic.



2862  
2863  
2864  
2865  
2866  
2867  
2868  
2869  
2870  
2871  
2872  
2873  
2874  
2875  
2876  
2877  
2878  
2879  
2880  
2881  
2882  
2883  
2884  
2885  
2886  
2887  
2888  
2889  
2890  
2891  
2892  
2893  
2894  
2895  
2896  
2897  
2898  
2899  
2900  
2901  
2902  
2903  
2904  
2905  
2906  
2907  
2908  
2909  
2910  
2911  
2912  
2913  
2914  
2915

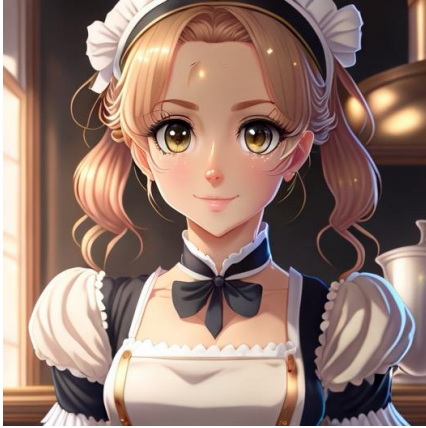

A full-body shot of an anime maid with rich detail, featuring a pretty face and eyes.

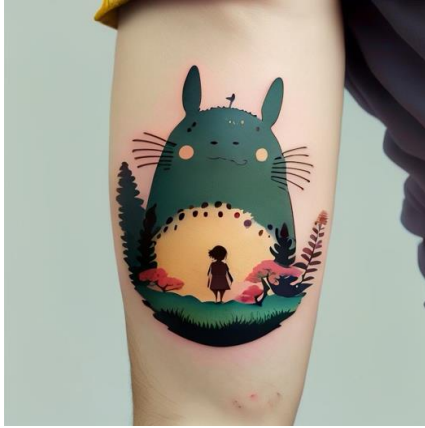

A minimalist tattoo inspired by the Studio Ghibli films

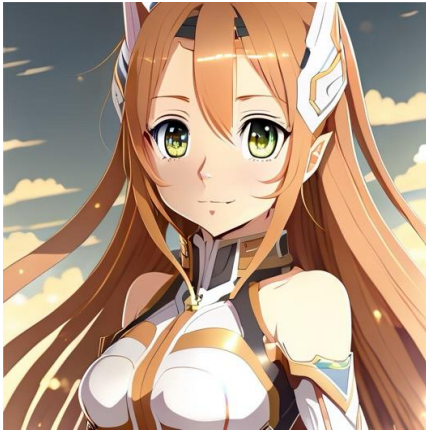

A puppy driving a car in a film still.

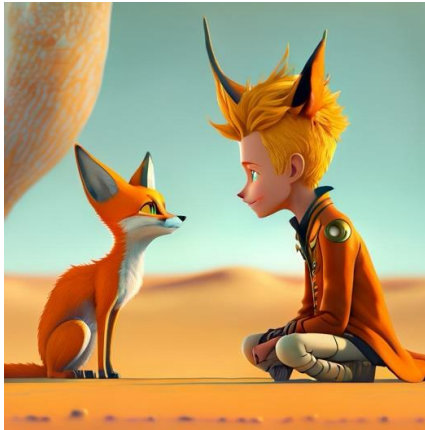

The Little Prince talking to the fox in an animation shot by Tim Burton's art.

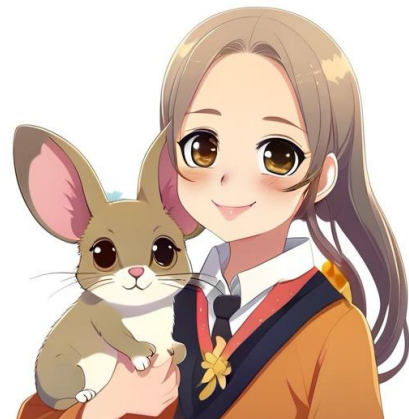

Anime portrait of an Asian schoolgirl with her pet sugar glider.

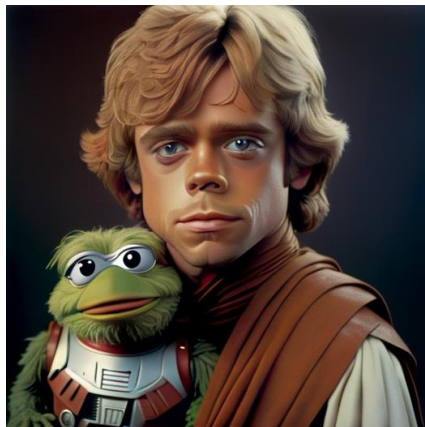

Luke Skywalker with Muppets.

Figure 52: High Quality Samples Produced by Meissonic.



2916  
2917  
2918  
2919  
2920  
2921  
2922  
2923  
2924  
2925  
2926  
2927  
2928  
2929  
2930  
2931  
2932  
2933  
2934  
2935  
2936  
2937  
2938  
2939  
2940  
2941  
2942  
2943  
2944  
2945  
2946  
2947  
2948  
2949  
2950  
2951  
2952  
2953  
2954  
2955  
2956  
2957  
2958  
2959  
2960  
2961  
2962  
2963  
2964  
2965  
2966  
2967  
2968  
2969

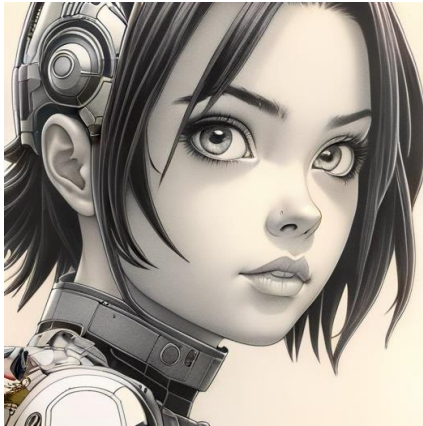

Medium shot black and white manga pencil drawing with a highly detailed face of Alita by Yukito Kishiro.

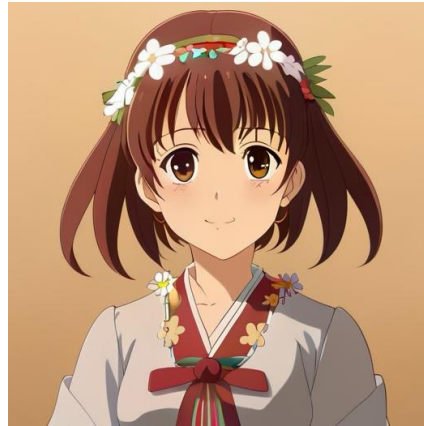

Studio photo portrait of Lain Iwakura from Serial Experiments Lain wearing floral garlands over her traditional dress.

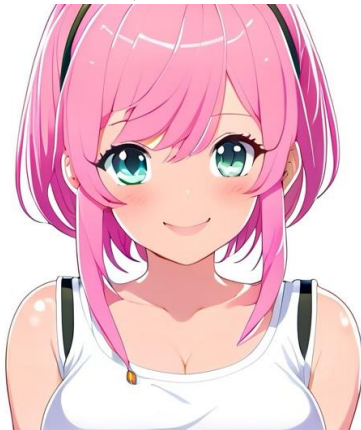

Frontal portrait of anime girl with pink hair wearing white t-shirt and smiling.

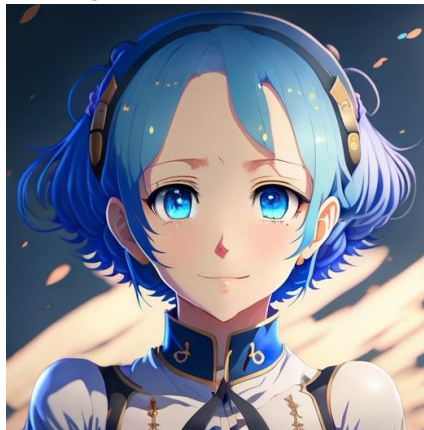

Anime oil painting of Rem from Re Zero.

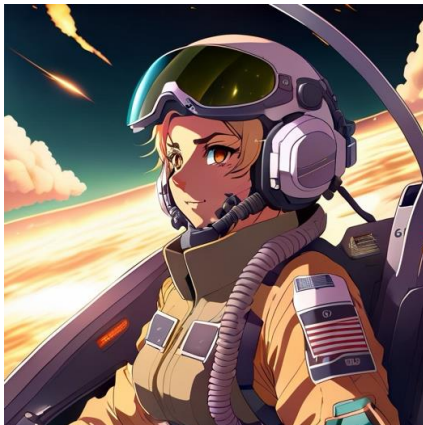

Anime-style fighter pilot in cockpit engaged in a night air battle with explosions.

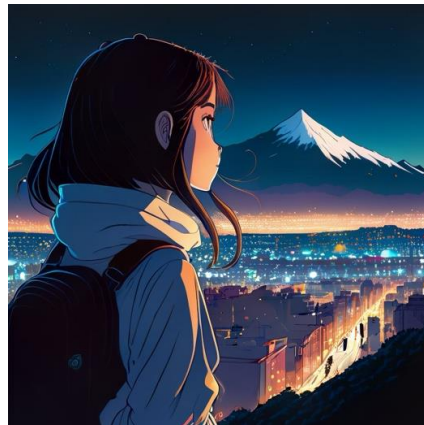

A girl gazes at a city from a mountain at night in a colored manga illustration by Diego Facio.

Figure 53: High Quality Samples Produced by Meissonic.

2970  
2971  
2972  
2973  
2974  
2975  
2976  
2977  
2978  
2979  
2980  
2981  
2982  
2983  
2984  
2985  
2986  
2987  
2988  
2989  
2990  
2991  
2992  
2993  
2994  
2995  
2996  
2997  
2998  
2999  
3000  
3001  
3002  
3003  
3004  
3005  
3006  
3007  
3008  
3009  
3010  
3011  
3012  
3013  
3014  
3015  
3016  
3017  
3018  
3019  
3020  
3021  
3022  
3023

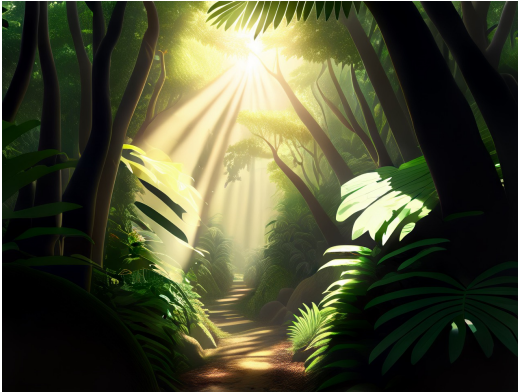

960 x 1280, A dense jungle with sunlight filtering through the canopy.

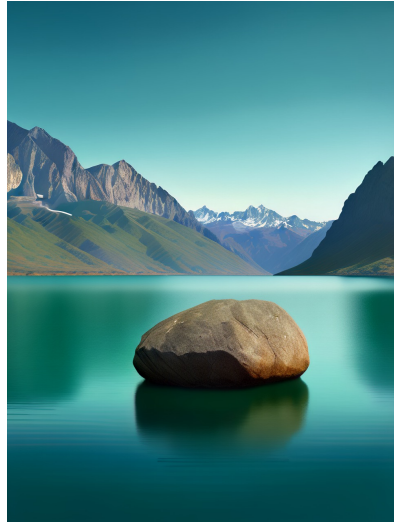

1280 x 960, A large body of water with a rock in the middle and mountains in the background.

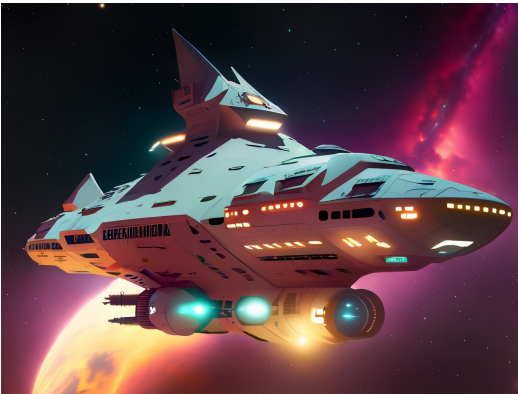

960 x 1280, A massive starship docked in a glowing nebula.

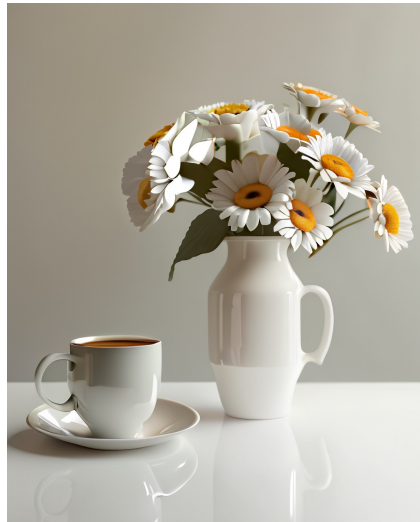

1280 x 1024, A white table with a vase of flowers and a cup of coffee on top of it.

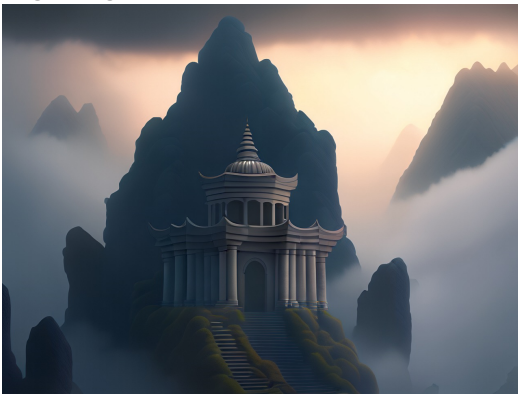

960 x 1280, A mystical temple hidden deep within a cloud-covered mountain.

Figure 54: More Images Produced by Meissonic at Diverse Resolutions.



3024  
3025  
3026  
3027  
3028  
3029  
3030  
3031  
3032  
3033  
3034  
3035  
3036  
3037  
3038  
3039  
3040  
3041  
3042  
3043  
3044  
3045  
3046  
3047  
3048  
3049  
3050  
3051  
3052  
3053  
3054  
3055  
3056  
3057  
3058  
3059  
3060  
3061  
3062  
3063  
3064  
3065  
3066  
3067  
3068  
3069  
3070  
3071  
3072  
3073  
3074  
3075  
3076  
3077

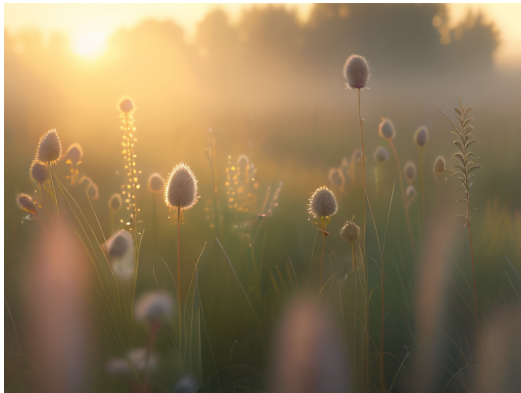

960 x 1280, A quiet meadow bathed in soft morning dew.

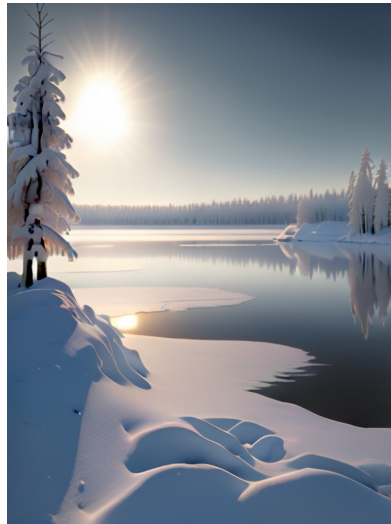

1280 x 960, A frozen lake surrounded by snow-covered trees under a pale winter sun.

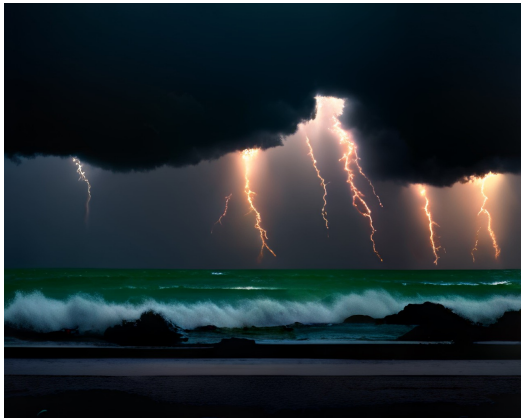

1024 x 1280, A stormy sea with crashing waves and lightning illuminating the clouds.

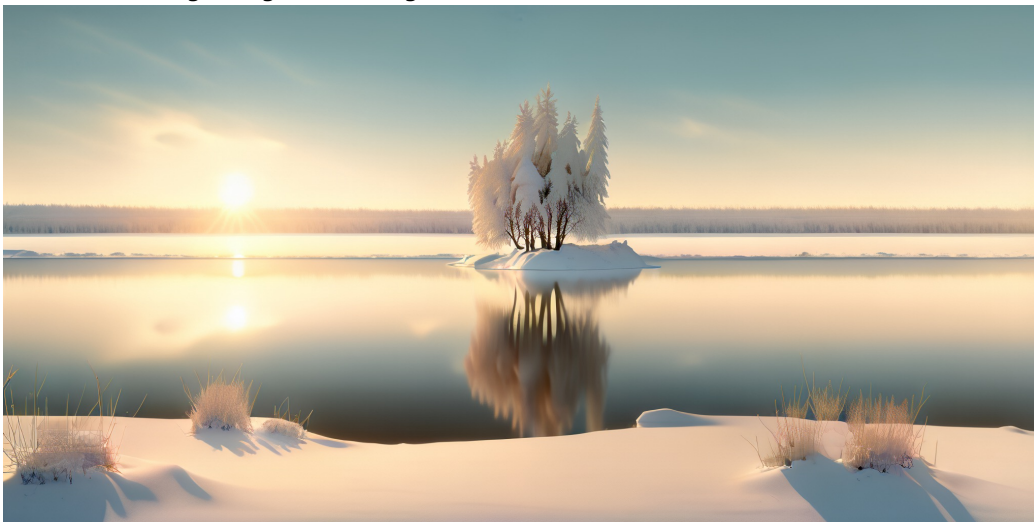

1024 x 2048, A frozen lake surrounded by snow-covered trees under a pale winter sun.

Figure 55: More Images Produced by Meissonic at Diverse Resolutions.
